# Supplementary material for: Degree of personalisation in tailored activities and its effect on behavioural and psychological symptoms and quality of life among people with dementia: a systematic review and meta-analysis
Source: PubMed Central journal article supplement — BMJ Open. 2021 Nov 29;11(11):e048917. doi: 10.1136/bmjopen-2021-048917 (PMC8634002; doi:10.1136/bmjopen-2021-048917), 2021-11-29
Supplement: bmjopen-2021-048917.draft_revisions.pdf [file bmjopen-2021-048917.draft_revisions.pdf]

# BMJ Open

BMJ Open is committed to open peer review. As part of this commitment we make the peer review history of every article we publish publicly available.

When an article is published we post the peer reviewers' comments and the authors' responses online. We also post the versions of the paper that were used during peer review. These are the versions that the peer review comments apply to.

The versions of the paper that follow are the versions that were submitted during the peer review process. They are not the versions of record or the final published versions. They should not be cited or distributed as the published version of this manuscript.

BMJ Open is an open access journal and the full, final, typeset and author-corrected version of record of the manuscript is available on our site with no access controls, subscription charges or pay-per-view fees (<http://bmjopen.bmj.com>).

If you have any questions on BMJ Open's open peer review process please email [info.bmjopen@bmj.com](mailto:info.bmjopen@bmj.com)

# BMJ Open

## Tailored activities for older adults with dementia: A systematic review and meta-analysis

|                               |                                                                                                                                                                                                                                                                                                                                                                                                                                                                                                                                                                                                                                                                                                          |
|-------------------------------|----------------------------------------------------------------------------------------------------------------------------------------------------------------------------------------------------------------------------------------------------------------------------------------------------------------------------------------------------------------------------------------------------------------------------------------------------------------------------------------------------------------------------------------------------------------------------------------------------------------------------------------------------------------------------------------------------------|
| Journal:                      | <i>BMJ Open</i>                                                                                                                                                                                                                                                                                                                                                                                                                                                                                                                                                                                                                                                                                          |
| Manuscript ID                 | bmjopen-2021-048917                                                                                                                                                                                                                                                                                                                                                                                                                                                                                                                                                                                                                                                                                      |
| Article Type:                 | Original research                                                                                                                                                                                                                                                                                                                                                                                                                                                                                                                                                                                                                                                                                        |
| Date Submitted by the Author: | 12-Jan-2021                                                                                                                                                                                                                                                                                                                                                                                                                                                                                                                                                                                                                                                                                              |
| Complete List of Authors:     | Lu, Shiyu ; University of Hong Kong, Sau Po Centre on Ageing<br>Zhang, Anna Y.; University of Hong Kong, Department of Social Work and Social Administration<br>Liu, Tianyin; University of Hong Kong, Department of Social Work and Social Administration<br>Choy, Jacky CP ; University of Hong Kong, Department of Social Work and Social Administration<br>Ma, Maggie S.L.; University of Hong Kong, Department of Social Work and Social Administration<br>Wong, Gloria; University of Hong Kong, Department of Social Work and Social Administration; Sau Po Centre on Ageing<br>Lum, Terry; University of Hong Kong, Department of Social Work and Social Administration; Sau Po Centre on Ageing |
| Keywords:                     | Dementia < NEUROLOGY, MENTAL HEALTH, Old age psychiatry < PSYCHIATRY                                                                                                                                                                                                                                                                                                                                                                                                                                                                                                                                                                                                                                     |
|                               |                                                                                                                                                                                                                                                                                                                                                                                                                                                                                                                                                                                                                                                                                                          |

SCHOLARONE™  
Manuscripts

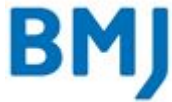

I, the Submitting Author has the right to grant and does grant on behalf of all authors of the Work (as defined in the below author licence), an exclusive licence and/or a non-exclusive licence for contributions from authors who are: i) UK Crown employees; ii) where BMJ has agreed a CC-BY licence shall apply, and/or iii) in accordance with the terms applicable for US Federal Government officers or employees acting as part of their official duties; on a worldwide, perpetual, irrevocable, royalty-free basis to BMJ Publishing Group Ltd ("BMJ") its licensees and where the relevant Journal is co-owned by BMJ to the co-owners of the Journal, to publish the Work in this journal and any other BMJ products and to exploit all rights, as set out in our [licence](#).

The Submitting Author accepts and understands that any supply made under these terms is made by BMJ to the Submitting Author unless you are acting as an employee on behalf of your employer or a postgraduate student of an affiliated institution which is paying any applicable article publishing charge ("APC") for Open Access articles. Where the Submitting Author wishes to make the Work available on an Open Access basis (and intends to pay the relevant APC), the terms of reuse of such Open Access shall be governed by a Creative Commons licence – details of these licences and which [Creative Commons](#) licence will apply to this Work are set out in our licence referred to above.

Other than as permitted in any relevant BMJ Author's Self Archiving Policies, I confirm this Work has not been accepted for publication elsewhere, is not being considered for publication elsewhere and does not duplicate material already published. I confirm all authors consent to publication of this Work and authorise the granting of this licence.

1  
2  
3 **Title:** Tailored activities for older adults with dementia: A systematic review and meta-  
4  
5 analysis  
6  
7

8  
9 **Authors & Affiliations:** Shiyu Lu,<sup>1</sup> Anna Y. Zhang,<sup>2</sup> Tianyin Liu,<sup>2</sup> Jacky C. P. Choy,<sup>2</sup>  
10  
11 Maggie S. L. Ma,<sup>2</sup> Gloria H. Y. Wong,<sup>1, 2</sup> & Terry Y. S. Lum<sup>1, 2</sup>  
12  
13

14  
15 <sup>1</sup> Sau Po Centre on Ageing, The University of Hong Kong.  
16

17 <sup>2</sup> Department of Social Work and Social Administration, The University of Hong Kong.  
18  
19

20  
21  
22 **Correspondence to:** Terry Y. S. Lum, Department of Social Work and Social  
23  
24 Administration, The University of Hong Kong, Pok Fu Lam, Hong Kong (Email:  
25 [tlum@hku.hk](mailto:tlum@hku.hk))  
26  
27

28  
29 **Word count :** 3,999  
30

31 **Tables & Figures:** 1 Table & 4 Figures  
32

33 **Supplementary Materials:** 4 Supplementary Tables; 7 Supplementary Figures;  
34

35 **Research Checklist:** 1 PRISMA checklist  
36  
37  
38  
39  
40  
41  
42  
43  
44  
45  
46  
47  
48  
49  
50  
51  
52  
53  
54  
55  
56  
57  
58  
59  
60

## ABSTRACT

**Objectives** To understand and assess the degree of tailoring of tailored activities for people with dementia (PWD); and to estimate the magnitude of effects of levels of tailoring activities on reducing behavioural and psychological symptoms of dementia (BPSDs), improving Quality of life (QoL) and other relevant outcomes among PWDs.

**Design** Systematic review with meta-analysis. ProQuest, PubMed, Ovid, Cochrane Library, Web of Science and CINAHL were searched from the start of indexing to May 2020.

**Results** Thirty-five studies covering a total of 2,390 participants from 16 countries/regions were included in the review. We developed a rating schema based on three dimensions: approaches to assessing PWD's characteristics for the design of tailored activities, the degree of individualization in intervention design, and to what extent the implementation manifested person-centered care. Studies with a high level of tailoring interventions (n=8) had a significant and moderate effect on reducing BPSDs (Standardized Mean Differences, SMD= -0.52, p <0.05), followed by medium (n=6; SMD= -0.38, p =0.071) and low level of tailoring interventions (n=4; SMD= -0.15, p =0.076). A high level of tailoring activities had a moderate effect size on improving QoL (n=5; SMD=0.52, p<0.05), followed by a medium level (n=3; SMD=0.41, p <0.05) of tailoring.

**Conclusions** Our review provides new directions for tailored activities development. To develop high-level tailoring activities to reduce BPSD and improve QoL among PWD, we recommended the application of structured and comprehensive assessments to identify and address two or more PWD characteristics in designed tailored activities, and allow modification of interventions to respond to changing PWD needs or circumstances.

### Strengths and limitations of this study

- The major contribution of this systematic reviews and meta-analyses is to develop a rating schema of the level of tailoring interventions
- To provide empirical evidence to the rating schema by investigating the effects of different levels of tailoring interventions on reducing behavioural and psychological symptoms of dementia and improving quality of life among people with dementia.
- Exclusion of papers not published in English may mean that important additional findings are missed.

## Tailored activities for older adults with dementia: A systematic review and meta-analysis

### INTRODUCTION

Dementia is particularly common among older adults, affecting 5-8% of people aged 60 and over at any given time worldwide.<sup>1</sup> Behavioural and psychological symptoms of dementia (BPSDs) are common among people living with dementia (PWD), such as agitation, depression, and resistance to care,<sup>2</sup> which occur throughout the disease process, associated with decreased quality of life (QoL).<sup>3</sup>

Non-pharmacological interventions are recommended as first-line treatments over pharmacological approaches to treat BPSDs and have less adverse effects.<sup>4</sup> Tailored activities to PWD are promising non-pharmacological approaches that reduce BPSDs and increase QoL. Two recently published NICE guidelines recommend that healthcare professionals offer activities to promote QoL that are tailored to personal preferences and consider using a structured tool to assess their likes, dislikes, routines and personal history.<sup>5,6</sup>

To our knowledge, six systematic reviews and meta-analyses have attempted to synthesize the effects of tailored activities on reducing BPSDs and enhancing QoL among PWD, based on tailored strategies, activity types, personal characteristics, and frequency and duration of delivery.<sup>7-12</sup> The first of these, published between 2000 and 2011 focused on the effectiveness of various tailored strategies to foster activity engagement and reduce BPSDs in PWD.<sup>7</sup> Changes to tools and materials used in activities were most common but yielded mixed outcomes of BPSDs reduction; modifications to space and social demands were rarely tested but yielded consistently positive outcomes.<sup>7</sup> In addition, a systematic review of studies published between 2000 and 2012 found that personalized pleasant activities yielded strong evidence for treating BPSDs, but limited evidence for physical and music activities<sup>8</sup>. Another meta-analysis found that individualized recreational activities were effective for reducing

1  
2  
3 BPSDs.<sup>9</sup> Recently, Mohler and colleagues conducted three meta-analyses regarding the effects  
4  
5 of tailored activities among PWD living in care facilities, communities and home settings,  
6  
7 respectively, found that, compared with usual care, tailored activities slightly reduced  
8  
9 BPSDs.<sup>10-12</sup> However, no differences in other desired outcomes between intervention and  
10  
11 control groups among different specific types of activities or duration of delivery were  
12  
13 evident. Although different activity components (e.g. activity types, PWD's characteristics,  
14  
15 frequency and duration of delivery) were discussed,<sup>7-12</sup> none of these reviews further  
16  
17 investigated the degree of tailoring among the tailored activities and synthesized its  
18  
19 associations with the desired outcomes.  
20  
21  
22

23  
24 Understanding the degree of tailoring of tailored activities is important. We define the  
25  
26 degree of tailoring of the tailored activities as the extent to which non-pharmacological  
27  
28 interventions are tailored, individualized or personalized for PWD. The conceptualization of  
29  
30 the degree of tailoring echoes the rationales and principles of effective interventions working  
31  
32 on BPSDs, level of engagement and QoL, embedded in occupational therapy,<sup>13</sup> engagement in  
33  
34 meaningful activities,<sup>14</sup> and person-centered care.<sup>15</sup> Occupational therapy emphasizes the fit  
35  
36 between PWD's capabilities and the occupation (e.g. activities or roles) through task  
37  
38 simplification and removing barriers in the physical and social environment.<sup>13</sup> Environmental  
39  
40 docility theory suggests that both underloading and overloading of external stimulations (e.g.  
41  
42 cognitive activities and social interactions) may lead to PWD's disengagement or excessive  
43  
44 disability.<sup>16</sup> Thus, maintaining PWD's engagement in meaningful activities through tailored  
45  
46 activities based on their physical strength, mental state, and psychosocial needs is essential.<sup>14</sup>  
47  
48 The person-centered care approach stresses service providers' and caregivers' autonomy to  
49  
50 determine specific ways of delivering care to maintain participants' engagement during the  
51  
52 intervention.<sup>15</sup> These theories imply that the degree of tailoring can significantly influence the  
53  
54 effectiveness of tailored tailored for PWD. Thus, the degree of tailoring could depend on how  
55  
56  
57  
58  
59  
60

1  
2  
3 to assess PWD's characteristics and their environment, how to design tailored activities based  
4 on PWD's characteristics, and interventionists' autonomy to address PWD's spontaneous  
5 needs.  
6  
7  
8  
9

10 Conceptualizing and quantifying the tailoring levels of existing tailored activities can  
11 advance our knowledge on developing highly tailored activities for PWD, deciding on the  
12 appropriate "dose" of tailoring, and translating this cumulative evidence into clinical practice.  
13  
14 However, there is little knowledge about how to assess the degree of tailoring among tailored  
15 activities and their effectiveness on targeted outcomes in existing literature.  
16  
17  
18  
19  
20

## 21 **OBJECTIVES**

22  
23 This systematic review and meta-analysis aimed to: (1) assess the degree of tailoring of existing  
24 tailored activities for PWD; (2) estimate the magnitude of the effects of levels of tailoring  
25 among existing tailored activities on reducing BPSDs, improving QoL and the level of  
26 engagement among PWD.  
27  
28  
29  
30  
31

## 32 **METHODS AND ANALYSIS**

33  
34 We conducted the review in accordance with the PRISMA procedure (see PRISMA-Checklist).  
35 Eligibility criteria required studies to: (a) include **participants** with dementia or cognitive  
36 impairment and aged 60 years or older; (b) include activities tailored to at least one of the  
37 participants' characteristics (e.g. needs, physical or/and mental ability, present or previous  
38 preference for particular activities or interests, habits, and physical living environment like  
39 housing conditions and caregiver management style); (c) report BPSDs (measured by multi-  
40 domain scales, such as Neuropsychiatric Inventory, and scales specific to agitation and  
41 depression/anxiety, such as Cohen-Mansfield Agitation Inventory and Cornell Scale for  
42 Depression in Dementia), QoL and level of engagement as outcomes; (d) include randomized  
43 controlled trials or quasi-experimental **study design**; and (e) apply a **control group** (e.g. usual  
44  
45  
46  
47  
48  
49  
50  
51  
52  
53  
54  
55  
56  
57  
58  
59  
60



1  
2  
3 care, wait-list, attention control etc.). The review included studies published in English from  
4  
5 the start of indexing to May 2020.  
6

7  
8 We searched ProQuest, PubMed, Ovid, Cochrane Library, Web of Science and CINAHL,  
9  
10 using the search terms: (1) “cognitive impairment” OR “cognitive disorder” OR “dement\*”  
11  
12 OR “Alzheimer”; (2) “tailor\*” OR “engag\*” OR “individual\*” OR “personal\*”; and (3)  
13  
14 “activit\*” OR “program\*” OR “therap\*” OR “intervention\*” OR “treatment\*”. The full search  
15  
16 strategy is shown in Supplementary Table 1.  
17

18  
19 The studies were initially screened for relevance by SYL and the final stage was undertaken  
20  
21 by SYL and AYZ. Data were extracted and checked by SYL and MSLM. Where there were  
22  
23 disagreements, data were rechecked for relevance and accuracy. Where available, raw data  
24  
25 (e.g. clinical interventions, strategies, outcomes and results) were extracted and entered into a  
26  
27 spreadsheet.<sup>17</sup> For each intervention we additionally extracted the following information:  
28  
29 PWD’s characteristics taken into account, intervention delivery, and information about the  
30  
31 tailoring process.  
32  
33

### 34 35 ***Patient and Public Involvement***

36  
37 No patient involved.  
38

### 39 40 ***Developing the tailoring and classification scheme***

41  
42 The authors formed an expert panel to develop a scheme for the level of tailoring interventions  
43  
44 based on the included studies. It comprised AYZ (a licensed social worker in Hong Kong with  
45  
46 two years’ clinical experience of dementia care and five years’ research experience focusing  
47  
48 on the mechanisms of non-pharmacological interventions for PWD), TYL, JCPC and SYL  
49  
50 (each of whom had over ten years’ experience in psychology and elderly care).  
51  
52

53  
54 Based on the theories and approaches mentioned above, we hypothesized that tailoring is  
55  
56 embedded in the whole process at three interrelated phases: assessments, design and  
57  
58 implementation, and the degree of tailoring is determined by these three dimensions: how to  
59  
60

1  
2  
3 assess PWD's characteristics before designing the intervention, the extent to which  
4 interventions are tailored according to PWD's characteristics, and the level of the  
5 interventionists' autonomy to address PWD's needs, as suggested by occupational therapy,  
6 engagement in meaningful activities, and the person-centered care approach.<sup>13-15</sup> To this end,  
7 we developed three corresponding criteria to rate levels of tailoring (Supplementary Table 2):

8  
9  
10  
11  
12  
13  
14 ***Assessment for the purpose of tailoring*** indicates how much detail about the targeted  
15 dimensions of PWD's characteristics is taken into account for designing tailored activities.  
16 Operationally, we distinguished levels of assessments based on their comprehensivity and  
17 systematicity, such as whether simple pre-assessments were conducted mainly on the  
18 individual's capacities, unstructured/semi-structured assessments, or well-structured  
19 assessments that captured a full picture of the individual's characteristics.

20  
21  
22  
23  
24  
25  
26  
27  
28 ***Individualization in intervention design*** refers to how the intervention design accounted  
29 for individuals' uniqueness and variations of their needs. To avoid counting the number or  
30 arbitrarily weighting specific PWD's characteristics, we distinguished the degree of  
31 individualization based on whether the protocol tailored for one versus two or more PWDs'  
32 characteristics.

33  
34  
35  
36  
37  
38  
39  
40  
41 ***Person-centered care in implementation*** refers to the extent to which the interventionists  
42 was able to adjust the intervention based on their professional judgement of changing dynamics  
43 or PWD's needs during implementation. For examples, the intervention is a standardized  
44 protocol of tailored activities regardless of spontaneous needs of PWD would be rated as low  
45 feasibility to pursuing person-centred care.

46  
47  
48  
49  
50  
51 ***Rating criteria.*** Based on these dimensions, we rated the level of tailoring of tailored  
52 activities as high, medium or low. High level refers to interventions targeting two or more  
53 domains (e.g., capabilities, preference, interests, life experience, and external environment)  
54 using systematic assessments and comprehensive activity plans while allowing the  
55  
56  
57  
58  
59  
60

1  
2  
3 interventionists to exercise their professional judgement to adjust the intervention in  
4  
5 accordance with PWD's needs. Medium level refers to tailoring that is assessed by unstructured  
6  
7 or semi-structured interviews rather than a systematic approach and professional judgements  
8  
9 are treated as supplements for pre-defined activity plans. Low level interventions targeted one  
10  
11 domain only with or without clear measures, and either did not mention professional judgement  
12  
13 or afforded it little weight. AYZ and SYL independently rated the level of tailoring for the  
14  
15 included tailored activities. Any conflicting ratings were resolved through discussions.  
16  
17  
18

### 19 ***Data synthesis and analysis***

20  
21 Given that outcomes in our review were continuous, effect sizes were expressed using  
22  
23 standardized mean differences (SMD) at 95% confidence intervals (CI),<sup>20</sup> interpreted as  
24  
25 Cohen's d.<sup>18</sup> Specifically, the values of 0.2, 0.5, and 0.8 reflected small, moderate and large  
26  
27 effect sizes, respectively.<sup>18</sup> Due to differences in settings and methods, we used the random-  
28  
29 effects model to pool the results. Heterogeneity was determined by Chi<sup>2</sup> and I<sup>2</sup> statistics.<sup>19, 20</sup>  
30  
31 We classified subgroup analyses of the effectiveness of tailored activities according to the  
32  
33 levels of tailoring of the interventions. All meta-analyses were conducted using Comprehensive  
34  
35 Meta-Analysis Software. Where raw data are not provided, summary results are given in the  
36  
37 text but not the forest plots.  
38  
39  
40

### 41 ***Quality Appraisal***

42  
43 SYL and MSLM independently assessed the risk of bias for the studies using a revised  
44  
45 Cochrane risk of bias tool for randomized trials,<sup>19, 21</sup> including: (a) bias arising from the  
46  
47 randomization process; (b) deviations from intended interventions; (c) bias due to missing  
48  
49 outcome data; (d) bias in measurement of the outcome; and (e) bias in selection of the reported  
50  
51 results. Risk Of Bias In Non-randomised Studies - of Interventions was used to categorize risk  
52  
53 of bias as "low," "high" or "some concerns".<sup>22</sup> Conflicting results were resolved through  
54  
55 discussions.  
56  
57  
58  
59  
60

## RESULTS

### *Summary of Search Results*

The search and study selection process is summarized in the PRISMA flow diagram (Supplementary Figure 1). In the identification phase, 14,238 abstracts were identified and imported into Endnote; 7,471 duplicate articles were removed. In the screening phase, the titles and abstracts of 6,767 articles were screened, and 6,476 irrelevant articles were excluded. In the eligibility phase, full-text screening was conducted for 291 articles according to the inclusion and exclusion criteria, and 35 studies were finally included in this review.

Included studies were conducted in 16 countries/regions: Australia, Brazil, Mainland China, Denmark, France, Germany, Hong Kong, Italy, Japan, Korea, the Netherlands, Norway, Switzerland, Taiwan, the United Kingdom, and the United States, published between 2000 and 2020. The average age of participants ranged from 62.1 to 89.2 years. Twenty-six studies included participants with dementia only, and the remaining studies included participants with different level of cognitive impairment (mild to moderate). The total size of the intervention groups (IG) was 1,248 (range = 6-158), and the total size of the control groups (CG) was 1,142 (range = 5-107). Fourteen studies (40%) had no more than 20 participants for each arm. Thirty studies were randomized controlled trials (RCTs). Five applied a quasi-experimental study design. Twenty-two applied usual care as the comparison, and the remaining applied placebo control, active control or wait-list control. Twenty-four studies were conducted in care facilities (such as a nursing home, geriatric health service facility, or hospital), and remaining studies were conducted in community settings or home-based settings (Supplementary Table 3).

### *Description of the interventions*

The components of activities can be categorized into four groups: physical (n=3),<sup>22-24</sup> cognitive (n=2),<sup>25, 26</sup> music (n=7)<sup>27-33</sup> and multiple activities (n=23).<sup>16, 34-55</sup> Twenty-three studies reported their interventions as individual mode, five reported group-based mode, and six reported mixed

1  
2  
3 modes, while the remaining studies did not provide details. Intervention was provided by  
4 specialists (e.g. occupational therapists, clinicians, psychologists, physical therapists, and  
5 speech therapists), researchers and by trained nursing home caregivers and staff. A detailed  
6 description of interventions is shown in Supplementary Table 4.  
7  
8  
9  
10  
11

### 12 ***Level of tailoring***

13  
14 Table 1 shows the level of tailoring in the interventions reported in the reviewed studies.

15  
16 *Level of assessment for tailoring.* Sixteen studies systematically assessed PWD's  
17 characteristics.<sup>16, 22, 31, 34-38, 42, 45, 47, 49-52, 55</sup> For instance, five studies followed the protocols of  
18 the Tailored Activity Program (TAP), which posits that with disease progression, dementia  
19 patients become increasingly vulnerable to their environment and experience lower thresholds  
20 for tolerating stimuli, which can result in behavioral disturbances. Therefore, TAP applied  
21 systematic approaches to discern PWD and their caregivers' daily routines, identify previous  
22 and current activity interests and collection information about dyadic communication and home  
23 environmental features for designing the activities for the participants.  
24  
25  
26  
27  
28  
29  
30  
31  
32  
33  
34

35  
36 *Degree of individualization in design.* Activities tailored according to PWD's characteristics  
37 included cognitive or/and physical capacities (n = 22),<sup>22-24, 26, 34, 35, 37-43, 45, 47, 49-55</sup> personal  
38 experience and history (n=2),<sup>30, 44</sup> role identity (n=3),<sup>35, 47, 51</sup> preferences and interests (n=14)  
39  
40  
41  
42  
43  
44  
45  
46  
47  
48  
49  
50  
51  
52  
53  
54  
55  
56  
57  
58  
59  
60  
22, 25, 36-38, 42, 43, 46, 49-53, 55 habits (n=2),<sup>47, 50</sup> music preference (n=6),<sup>27-29, 31-33</sup> cultural  
backgrounds (n=1),<sup>43</sup> and living environment (n=5).<sup>45, 47, 49, 50, 52</sup> Five studies also considered  
caregivers' characteristics.<sup>42, 47, 49, 50, 52</sup> Twelve studies tailored the intervention for a single  
aspect of PWD's characteristics only, while the remainder tailored the activities for at least  
two. One study used 3-arm in intervention groups with one tailoring both for PWD's capacity  
and interests, the second only tailoring for the capacities yet opposite to PWD's preference and  
the third only tailoring for the interests yet challenging to PWD's capacity.<sup>37</sup>

1  
2  
3 *Degree of person-centered care in delivery.* Twenty-six studies indicted the level of  
4 flexibility for modification of activities during the intervention. Sixteen studies explicitly  
5 permitted the interventionists to review and modify the intervention according to participants'  
6 spontaneous needs and circumstances,<sup>16, 22, 31, 32, 35-38, 42, 45, 47-52</sup> thus were rated as offering a  
7 high degree of person-centered care. Five allowed some flexibility for adjusting interventions  
8 during implementation,<sup>30, 43, 53-55</sup> thus were rated as offering some flexibility. Five studies  
9 enabled relatively limited adjustment of intervention to take account of PWD's changed needs  
10 or circumstances.<sup>23, 28, 30, 33, 46</sup> The remaining studies provided insufficient information to judge  
11 the extent of flexibility allowed during the intervention.  
12  
13  
14  
15  
16  
17  
18  
19  
20  
21  
22

23  
24 Based on the three-dimension rating schema, we identified the tailoring level of 12 studies  
25 as high,<sup>16, 22, 31, 35, 36, 42, 45, 47, 49-52</sup> 11 as medium,<sup>30, 32, 34, 38, 40, 41, 43, 48, 54, 55</sup> and 11 as the low.<sup>23-29,</sup>  
26  
27  
28  
29  
30  
31  
32  
33  
34  
35  
36  
37  
38  
39  
40  
41  
42  
43  
44  
45  
46  
47  
48  
49  
50  
51  
52  
53  
54  
55  
56  
57  
58  
59  
60

<Insert Table 1>

### ***Quality appraisal***

The risk bias of 10 RCT studies was judged as low, while that of 12 was rated as high, and the remainder were judged as giving some concern (Supplementary Figure 2). Among all RCT studies, 19 reported the method of random sequence generation (e.g. computer generated programs, random list generator, random allocation by an external researchers and block randomization).<sup>16, 24-26, 29, 30, 33, 37-39, 42, 45, 47, 49-52, 54, 55</sup> Eleven were rated as high risk of deviation from intended intervention as they were judged as high risk of blinding participants, personnel and appropriate analysis used to estimate the effect of assignment to intervention.<sup>23-26, 29, 32, 36, 38, 39, 44, 48</sup> Five quasi-experimental studies were excluded from the meta-analysis since none were rated at low risk of bias and thus comparable to RCTs (Supplementary Figure 3).

### ***Effects of tailored interventions***

1  
2  
3 Twenty-six studies reported the outcomes of BPSDs measured by multi-dimension or specific  
4 scales of agitation.<sup>16, 23-25, 27, 29-33, 35-38, 40, 42, 43, 46, 47, 49-55</sup> The higher scores indicated more BPSDs.  
5  
6  
7 According to our meta-analysis, 18 RCTs with 20 tailored activities had an overall small effect  
8 on BPSDs at post-intervention ( $SMD_{pooled} = -0.38$ ; 95% CI: -0.54 to -0.23,  $p < 0.001$ ), although  
9 significant heterogeneity was found ( $I^2 = 64.17\%$ ,  $p < 0.001$ ) (Figure 1). Eight studies were  
10 excluded from the meta-analysis either because of their quasi-experimental design or lack of  
11 comparable data,<sup>27, 32, 33, 40, 43, 46, 51, 53</sup> and four of these did not find difference in reducing BPSDs  
12 between IG and CG.<sup>27, 32, 33, 46</sup>

21 <Insert Figure 1>

22  
23  
24 Nine studies reported the outcome of QoL.<sup>16, 30, 44, 45, 47, 48, 50, 52, 54</sup> The higher score indicates  
25 higher QoL. Tailored interventions had an overall small effect on QoL at post-intervention  
26 ( $SMD_{pooled} = 0.45$ ; 95% CI: 0.25 to 0.64,  $p < 0.001$ ), and no significant heterogeneity was  
27 found ( $I^2 = 11.56\%$ ,  $p > 0.05$ ) (Figure 2).

32 <Insert Figure 2>

33  
34  
35 Sixteen studies reported the outcome of depression,<sup>16, 22, 24-26, 28, 35, 39-42, 44-46, 48, 54</sup> measured  
36 by the Cornell Scale for Depression in Dementia, Geriatric Depression Scale, Multidimensional  
37 Observation Scale for Elderly Subjects, Geriatric Depression Scale, Neuropsychiatric  
38 Inventory subscale for depression, or Patient Health Questionnaire-9. The higher score  
39 indicates more depression. Thirteen RCT studies with 14 tailored activities indicated those  
40 activities had a small overall effect on depression at post-intervention ( $SMD_{pooled} = -0.26$ ; 95%  
41 CI: -0.40 to -0.12,  $p < 0.001$ ), and no significant heterogeneity was found (Supplementary  
42 Figure 4). The remaining three studies were excluded from the meta-analysis because of their  
43 quasi-experimental design or lack of comparable data,<sup>28, 40, 46</sup> and only one study did not find  
44 difference in reducing depression between IG and CG.<sup>40</sup>

1  
2  
3 Seven studies with nine interventions reported the outcome of engagement.<sup>16, 34, 35, 37, 38, 47,</sup>  
4  
5  
6 <sup>48</sup> Higher scores indicate higher level of engagement. The meta-analysis indicated that tailored  
7  
8 interventions of eight matched IGs and CGs in six studies had an overall large effect on level  
9  
10 of engagement at post-intervention (SMD<sub>pooled</sub> = 0.86; 95% CI: 0.23 to 1.48, p < 0.001)  
11  
12 (Supplementary Figure 5). Significant heterogeneity was found, primarily generated by the  
13  
14 outlier study whose intervention specifically targeted participants' self-identity roles and which  
15  
16 reported large effects on the engagement (SMD<sub>pooled</sub> = 3.52; 95% CI: 2.87 to 4.17, p < 0.001).<sup>35</sup>  
17  
18 Removal of this study resulted in lower and non-significant heterogeneity with significant  
19  
20 small effect size (SMD<sub>adjusted pooled</sub> = 0.47; 95% CI: 0.23 to 0.60, p < 0.001). One study with a  
21  
22 quasi-experimental design reported increased engagement at post-intervention.<sup>34</sup>  
23  
24  
25

### 26 ***Subgroup analysis***

27  
28 Subgroup analysis was performed to test the difference of the effects of the level of tailoring  
29  
30 on outcomes (Figures 3 & 4). Studies with a high level of tailoring activities had significant  
31  
32 and the largest effect size regarding the reduction of BPSDs (SMD<sub>pooled</sub> = -0.52, p < 0.001)  
33  
34 with non-significant heterogeneity, followed by medium (SMD<sub>pooled</sub> = -0.38, p = 0.071) and  
35  
36 low groups (SMD<sub>pooled</sub> = -0.15, p = 0.076), although both the latter two groups had marginally  
37  
38 significant effect sizes and significant heterogeneity. The high group had a moderate effect size  
39  
40 on improvement in QoL (SMD<sub>pooled</sub> = 0.52, p < 0.01), followed by the medium group (SMD  
41  
42 <sub>pooled</sub> = 0.41, p < 0.05). Only one study with low level of tailoring reported the outcome of QoL  
43  
44 with moderate effect size (SMD = 0.72, p < 0.05).  
45  
46  
47  
48

49 <Insert Figure 3>

50  
51 <Insert Figure 4>

52  
53  
54 Subgroup analysis was performed to test the difference of the effects of level of tailoring on  
55  
56 depression and engagement (Supplementary Figures 6 & 7). The medium group had a moderate  
57  
58 effect size regarding reduction in depression (SMD<sub>pooled</sub> = -0.64, p < 0.05), followed by the  
59  
60



1  
2  
3 high group ( $SMD_{pooled} = -0.33, p < 0.01$ ). The three studies with medium level of tailoring  
4  
5 activities all involved social or group interaction components that have beneficial effects on  
6  
7 PWD's mental health. Only one study rated high on tailoring had a large effect on improving  
8  
9 engagement level at post-intervention ( $SMD = 0.85, p < 0.01$ ). The medium group had small  
10  
11 effect size ( $SMD_{pooled} = 0.44, p < 0.05$ ), followed by the low group ( $SMD_{pooled} = 0.39, p <$   
12  
13  $0.05$ ).  
14  
15

## 16 17 **Discussion**

18  
19 Our systematic review aimed to assess the degree of individualization/personalization of  
20  
21 tailored activities and estimate the effect of levels of tailoring interventions on reducing BPSD,  
22  
23 improving QoL and other relevant outcomes among PWDs. Thirty-five studies met our  
24  
25 inclusion criteria, covering a total of 2,390 participants from 16 countries/regions. The  
26  
27 activities included in the interventions comprised physical, cognitive, music and multiple  
28  
29 activities. The number of studies in our review helped increase the generalizability of our  
30  
31 findings.  
32  
33

34  
35 We employed meta-analysis to estimate the overall effects of tailored activities on the  
36  
37 outcomes of BPSD, QoL, depression and engagement. We found that tailored activities slightly  
38  
39 reduced BPSDs, consistent with previous meta-analyses targeting facilities, communities, and  
40  
41 PWDs' own home.<sup>10-12</sup> We also found that tailored activities had a small effect on improving  
42  
43 QoL. In contrast, previous reviews found inconclusive evidence regarding QoL: no effect in  
44  
45 facilities, and a slight improvement in both community- and home-based settings.<sup>10-12</sup> Our  
46  
47 findings also showed that tailored activities had small effects on depression, and large effects  
48  
49 on engagement, contradicting previous reviews reporting little or no effect on these outcomes.<sup>11,</sup>  
50  
51

52  
53  
54  
55  
56  
57  
58  
59  
60

56 We developed the rating schema of tailoring level based on three essential components:  
57  
58 assessment for tailoring, individualization in intervention design and person-centered care in  
59  
60

1  
2  
3 implementation. Overall, we rated only 12 studies as high regarding activities, 11 as medium,  
4  
5 11 as low and 1 study was rated as mixed because it has 3-arm intervention groups with one  
6  
7 medium and two low levels of tailoring activities for comparison.  
8  
9

10 We further investigated how the degree of tailoring influenced intervention effectiveness on  
11  
12 the interested outcomes. Interventions with a high level of tailoring activities had a significant  
13  
14 and moderate effect, followed by medium (small) and low groups (trivial), and the latter two  
15  
16 groups had significant heterogeneity and marginally significant effect sizes. Interventions with  
17  
18 a high level of tailoring intervention had a moderate effect size on improving QoL, followed  
19  
20 by the medium group. Only one study with a low level of tailoring reported the outcome of  
21  
22 QoL with moderate effect size. These findings lend support to our rating schema as the overall  
23  
24 goals of tailoring activities are to reduce BPSDs and improve QoL.<sup>50, 52</sup> A similar pattern was  
25  
26 found in the level of engagement; but since the degree of tailoring was rated high in only one  
27  
28 study, this should be interpreted with caution.  
29  
30  
31  
32

33 This systematic review has several limitations. The generalizability of our results may be  
34  
35 limited since we only included studies reported in English. The included studies had risks of  
36  
37 bias that may undermine the quality of evidence. Furthermore, noticeable heterogeneity was  
38  
39 found among studies with outcomes of BPSDs and engagement, which may affect the  
40  
41 conclusions synthesized from these studies. Thus, these results must be interpreted with caution.  
42  
43

44 This review has implications for clinical practice. It provides new insights into non-  
45  
46 pharmacological tailored activities by developing a rating schema for the level of tailoring and  
47  
48 tested its validity by investigating the effectiveness of interventions with different levels of  
49  
50 tailoring on BPSDs and QoL. Healthcare professionals and practitioners can use our findings  
51  
52 to tailor interventions to benefit patients' outcomes. We recommended the application of  
53  
54 structural and comprehensive assessment approaches to identify and address two or more  
55  
56 PWD's characteristics (capacities, preference, habits and living environment etc.) in designing  
57  
58  
59  
60

1  
2  
3 tailored activities, and allow interventionists to use their professional judgement to modify the  
4  
5 interventions to respond to spontaneous needs of PWD to develop a high level of tailoring  
6  
7 interventions.  
8  
9

10 Our systematic review has implications for future intervention research. Fourteen studies  
11  
12 had no more than 20 participants for each arm, and only 10 RCT studies were judged as low  
13  
14 risk. Evaluation studies should adhere to current methodological standards, e.g. a randomized  
15  
16 and concealed allocation; adequate blinding (at least participants and outcome assessors); and  
17  
18 recruitment of adequate samples.<sup>19</sup>  
19  
20

## 21 **CONCLUSION**

22  
23 This systematic review shows that tailored activities slightly reduced BPSDs and depression,  
24  
25 had a small effect on improving QoL, and have large effects on facilitating level of engagement  
26  
27 among PWD. Additionally, we advanced existing literature by proposing and testing the  
28  
29 validity of a rating schema for level of tailoring. Our findings can provide new directions into  
30  
31 developing tailored activities. Additional high-quality tailored intervention studies with  
32  
33 sufficient samples are needed.  
34  
35  
36  
37  
38  
39  
40  
41  
42  
43  
44  
45  
46  
47  
48  
49  
50  
51  
52  
53  
54  
55  
56  
57  
58  
59  
60

1  
2  
3 **Contributors** SYL wrote the systematic review, performed the preliminary searches and data  
4 extraction, conducted quality assessments and drafted the systematic review paper. AYZ,  
5 TYL and JCPC designed the level of tailoring rating schema. MSLM cross-checked data  
6 extraction and performed quality ratings independently. GHYW and TYSL made substantial  
7 contributions to conception and design of the systematic review and, assisted SYL, AYZ,  
8 TYL and JCPC to resolve any discrepancies regarding study inclusion, data extraction and  
9 quality ratings. All authors offered critical revisions for the systematic review manuscript.  
10  
11

12 **Funding** This work was supported by a donation from Mr Tin Hing-Sin Sam for the  
13 promotion of non-pharmacological interventions for people with dementia and their  
14 caregivers in community.  
15

16 **Competing interests** none.  
17

18 **Provenance and peer review** Not commissioned; externally peer reviewed.  
19  
20

21 **Data sharing statement** No additional data are available.  
22  
23  
24  
25  
26  
27  
28  
29  
30  
31  
32  
33  
34  
35  
36  
37  
38  
39  
40  
41  
42  
43  
44  
45  
46  
47  
48  
49  
50  
51  
52  
53  
54  
55  
56  
57  
58  
59  
60

## References

1. World Health Organization. Dementia 2019 [Available from: <https://www.who.int/news-room/fact-sheets/detail/dementia>].
2. Kales HC, Gitlin LN, Lyketsos CG. Assessment and management of behavioral and psychological symptoms of dementia. *Bmj-Brit Med J*. 2015;350.
3. Gitlin LN, Kales HC, Lyketsos CG. Nonpharmacologic management of behavioral symptoms in dementia. *Journal of the American Medical Association*. 2012;308(19):2020-9.
4. de Oliveira AM, Radanovic M, de Mello PCH, Buchain PC, Vizzotto ADB, Celestino DL, et al. Nonpharmacological Interventions to Reduce Behavioral and Psychological Symptoms of Dementia: A Systematic Review. *Biomed Res Int*. 2015;2015:218980-.
5. NICE. Dementia: Assessment, management and support for people living with dementia and their carers [NG97] 2018 [updated June 2018. Available from: <https://www.nice.org.uk/guidance/ng97>].
6. NICE. Dementia: Quality standard [QS184]. 2019.
7. Trahan MA, Kuo J, Carlson MC, Gitlin LN. A systematic review of strategies to foster activity engagement in persons with dementia. *Health Educ Behav*. 2014;41(1 Suppl):70S-83S.
8. Testad I, Corbett A, Aarsland D, Lexow KO, Fossey J, Woods B, et al. The value of personalized psychosocial interventions to address behavioral and psychological symptoms in people with dementia living in care home settings: a systematic review. *International Psychogeriatrics*. 2014;26(7):1083-98.
9. Travers C, Brooks D, Hines S, O'Reilly M, McMaster M, He W, et al. Effectiveness of meaningful occupation interventions for people living with dementia in residential aged care: a systematic review. *JBI Database System Rev Implement Rep*. 2016;14(12):163-225.
10. Mohler R, Renom A, Renom H, Meyer G. Personally tailored activities for improving psychosocial outcomes for people with dementia in long-term care. *Cochrane Db Syst Rev*. 2018(2).
11. Mohler R, Renom A, Renom H, Meyer G. Personally tailored activities for improving psychosocial outcomes for people with dementia in community settings. *Cochrane Db Syst Rev*. 2020(8).
12. Möhler R, Renom A, Renom H, Meyer G. Personally tailored activities for people with dementia living in their own homes. *Cochrane Database of Systematic Reviews 2020*. 2020.
13. Bennett S, Laver K, Voigt-Radloff S, Letts L, Clemson L, Graff M, et al. Occupational therapy for people with dementia and their family carers provided at home: a systematic review and meta-analysis. *BMJ open*. 2019;9(11).
14. Macaulay S. The broken lens of BPSD: Why we need to rethink the way we label the behavior of people who live with Alzheimer disease. *Journal of the American Medical Directors Association*. 2018;19(2):177-80.
15. Chenoweth L, King MT, Jeon Y-H, Brodaty H, Stein-Parbury J, Norman R, et al. Caring for Aged Dementia Care Resident Study (CADRES) of person-centred care, dementia-care mapping, and usual care in dementia: a cluster-randomised trial. *The Lancet Neurology*. 2009;8(4):317-25.
16. Gitlin LNP, Winter LP, Burke JPOTRLF, Chernett NMPH, Dennis MPP, Hauck WWP. Tailored Activities to Manage Neuropsychiatric Behaviors in Persons With Dementia and Reduce Caregiver Burden: A Randomized Pilot Study. *The American Journal of Geriatric Psychiatry*. 2008;16(3):229-39.
17. Cochrane Effective Practice and Organisation of Care (EPOC). Describing interventions in EPOC reviews 2017 [Available from: <https://epoc.cochrane.org/resources/epoc-resources-review-authors>].
18. Cohen J. Statistical power analysis for the behavioral sciences: Academic press; 2013.
19. Higgins JP, Green S. Cochrane handbook for systematic reviews of interventions. Chichester: John Wiley & Sons; 2011.
20. Higgins JP, Li T, Deeks JJ. Choosing effect measures and computing estimates of effect: The Cochrane Collaboration; 2019 [Available from: [www.training.cochrane.org/handbook](http://www.training.cochrane.org/handbook)].

21. Sterne JAC, Savovic J, Page MJ, Elbers RG, Blencowe NS, Boutron I, et al. RoB 2: a revised tool for assessing risk of bias in randomised trials. *Bmj-Brit Med J*. 2019;366.
22. Lam CWL, Lui WCV, Luk NYD, Chau R, So C, Poon V, et al. Effectiveness of an individualized functional training program on affective disturbances and functional skills in mild and moderate dementia - a randomized control trial. *International Journal of Geriatric Psychiatry*. 2009;25(2):133-41.
23. Holthoff VA, Marschner K, Scharf M, Steding J, Meyer S, Koch R, et al. Effects of Physical Activity Training in Patients with Alzheimer's Dementia: Results of a Pilot RCT Study. *Plos One*. 2015;10(4).
24. Telenius EW, Engedal K, Bergl A. Effect of a High-Intensity Exercise Program on Physical Function and Mental Health in Nursing Home Residents with Dementia: An Assessor Blinded Randomized Controlled Trial. *Plos One*. 2015;10(5).
25. Davison TED, Nayer KBID, Coxon SP, de Bono AP, Eppingstall BMA, Jeon Y-HP, et al. A personalized multimedia device to treat agitated behavior and improve mood in people with dementia: A pilot study. *Geriatric Nursing*. 2016;37(1):25.
26. Giuli C, Papa R, Lattanzio F, Postacchini D. The Effects of Cognitive Training for Elderly: Results from My Mind Project. *Rejuvenation Research*. 2016;19(6):485-+.
27. Garland K, Beer E, Eppingstall B, O'Connor DW. A comparison of two treatments of agitated behavior in nursing home residents with dementia: simulated family presence and preferred music. *Am J Geriatr Psychiatry*. 2007;15(6):514-21.
28. Sung H-C, Chang AM, Lee W-L. A preferred music listening intervention to reduce anxiety in older adults with dementia in nursing homes. *Journal of Clinical Nursing*. 2009;19(7):1056-64.
29. Lin Y, Chu H, Yang C-Y, Chen C-H, Chen S-G, Chang H-J, et al. Effectiveness of group music intervention against agitated behavior in elderly persons with dementia. *International Journal of Geriatric Psychiatry*. 2011;26(7):670-8.
30. Ridder HMO, Stige B, Qvale LG, Gold C. Individual music therapy for agitation in dementia: an exploratory randomized controlled trial. *Aging & Mental Health*. 2013;17(6):667-78.
31. Sakamoto M, Ando H, Tsutou A. Comparing the effects of different individualized music interventions for elderly individuals with severe dementia. *Int Psychogeriatr*. 2013;25(5):775-84.
32. Kwak J, Anderson K, O'Connell Valuch K. Findings From a Prospective Randomized Controlled Trial of an Individualized Music Listening Program for Persons With Dementia. *J Appl Gerontol*. 2018:733464818778991.
33. Weise L, Töpfer NF, Deux J, Wilz G. Feasibility and effects of individualized recorded music for people with dementia: A pilot RCT study. *Nordic Journal of Music Therapy*. 2020;29(1):39-56.
34. Orsulic-Jeras S, Judge KS, Camp CJ. Montessori-based activities for long-term care residents with advanced dementia: Effects on engagement and affect. *Gerontologist*. 2000;40(1):107-11.
35. Cohen-Mansfield J, Parpura-Gill A, Gol, er H. Utilization of self-identity roles for designing interventions for persons with dementia. *Journals of Gerontology Series B-Psychological Sciences and Social Sciences*. 2006;61(4):P202-P12.
36. Cohen-Mansfield J, Libin A, Marx MS. Nonpharmacological treatment of agitation: a controlled trial of systematic individualized intervention. *J Gerontol A Biol Sci Med Sci*. 2007;62(8):908-16.
37. Kolanowski A, Litaker M, Buettner L, Moeller J, Costa PT, Jr. A randomized clinical trial of theory-based activities for the behavioral symptoms of dementia in nursing home residents. *Journal of the American Geriatrics Society*. 2011;59(6):1032-41.
38. van der Ploeg ES, Eppingstall B, Camp CJ, Runci SJ, Taffe J, O'Connor DW. A randomized crossover trial to study the effect of personalized, one-to-one interaction using Montessori-based activities on agitation, affect, and engagement in nursing home residents with Dementia. *Int Psychogeriatr*. 2013;25(4):565-75.
39. Yoon JE, Lee SM, Lim HS, Kim TH, Jeon JKN, Mun MH. The Effects of Cognitive Activity Combined with Active Extremity Exercise on Balance, Walking Activity, Memory Level and Quality of

- 1  
2  
3 Life of an Older Adult Sample with Dementia. *Journal of Physical Therapy Science*. 2013;25(12):1601-  
4 4.  
5  
6 40. Toba K, Nakamura Y, Endo H, Okochi J, Tanaka Y, Inaniwa C, et al. Intensive rehabilitation for  
7 dementia improved cognitive function and reduced behavioral disturbance in geriatric health service  
8 facilities in Japan. *Geriatr Gerontol Int*. 2014;14(1):206-11.  
9  
10 41. Lu YYF, Bakas T, Yang ZY, Weaver MT, Austrom MG, Haase JE. Feasibility and Effect Sizes of  
11 the Revised Daily Engagement of Meaningful Activities Intervention for Individuals With Mild  
12 Cognitive Impairment and Their Caregivers. *Journal of Gerontological Nursing*. 2016;42(3):45-58.  
13  
14 42. Prick AE, de Lange J, Scherder E, Twisk J, Pot AM. The effects of a multicomponent dyadic  
15 intervention on the mood, behavior, and physical health of people with dementia: a randomized  
16 controlled trial. *Clinical Interventions in Aging*. 2016;11:383-95.  
17  
18 43. Li DM, Li XX. The effect of folk recreation program in improving symptoms: a study of  
19 Chinese elder dementia patients. *International Journal of Geriatric Psychiatry*. 2016;32(8):901-8.  
20  
21 44. Tanaka S, Honda S, Nakano H, Sato Y, Araya K, Yamaguchi H. Comparison between group and  
22 personal rehabilitation for dementia in a geriatric health service facility: single-blinded randomized  
23 controlled study. *Psychogeriatrics*. 2017;17(3):177-85.  
24  
25 45. Jeon Y-H, Krein L, Simpson JM, Szanton SL, Clemson L, Naismith SL, et al. Feasibility and  
26 potential effects of interdisciplinary home-based reablement program (i-harp) for people with  
27 cognitive and functional decline: A pilot trial. *Aging & Mental Health*. 2019.  
28  
29 46. Huber A, Oppikofer S, ra, Meister L, Langensteiner F, Meier N, et al. Music & memory:  
30 The impact of individualized music listening on depression, agitation, and positive emotions in  
31 persons with dementia. *Activities, Adaptation & Aging*. 2020.  
32  
33 47. Gitlin LNP, Winter LP, Dennis MPPE, Hodgson NPRN, Hauck WWP. A Biobehavioral Home-  
34 Based Intervention and the Well-being of Patients With Dementia and Their Caregivers: The COPE  
35 Randomized Trial: The Journal of the American Medical Association The Journal of the American  
36 Medical Association. *JAMA*. 2010;304(9):983-91.  
37  
38 48. Bailey EM, Stevens AB, LaRocca MA, Scogin F. A Randomized Controlled Trial of a  
39 Therapeutic Intervention for Nursing Home Residents With Dementia and Depressive Symptoms. *J*  
40 *Appl Gerontol*. 2017;36(7):895-908.  
41  
42 49. Gitlin LN, Arthur P, Piersol C, Hessels V, Wu SS, Dai YF, et al. Targeting Behavioral Symptoms  
43 and Functional Decline in Dementia: A Randomized Clinical Trial. *Journal of the American Geriatrics*  
44 *Society*. 2017;66(2):339-45.  
45  
46 50. Novelli M, Machado SCB, Lima GB, Cantatore L, Sena BP, Rodrigues RS, et al. Effects of the  
47 Tailored Activity Program in Brazil (TAP-BR) for Persons With Dementia A Randomized Pilot Trial.  
48 *Alzheimer Disease & Associated Disorders*. 2018;32(4):339-45.  
49  
50 51. Oliveira A, Martini r, Radanovic M, Homem de Mello PC, Buchain PC, Dias Vizzotto A, et al.  
51 An intervention to reduce neuropsychiatric symptoms and caregiver burden in dementia:  
52 Preliminary results from a randomized trial of the tailored activity program—outpatient version.  
53 *International Journal of Geriatric Psychiatry*. 2018.  
54  
55 52. O'Connor CM, Clemson L, Brodaty H, Low LF, Jeon YH, Gitlin LN, et al. The tailored activity  
56 program (TAP) to address behavioral disturbances in frontotemporal dementia: a feasibility and pilot  
57 study. *Disability and Rehabilitation*. 2019;41(3):299-310.  
58  
59 53. Van Haitsma KS, Curyto K, Abbott KM, Towsley GL, Spector A, Kleban M. A randomized  
60 controlled trial for an individualized positive psychosocial intervention for the affective and  
behavioral symptoms of dementia in nursing home residents. *J Gerontol B Psychol Sci Soc Sci*.  
2013;70(1):35-45.  
54  
55 54. Dechamps A, Alban R, Jen J, Decamps A, Traissac T, Dehail P. Individualized Cognition-Action  
56 intervention to prevent behavioral disturbances and functional decline in institutionalized older  
57 adults: a randomized pilot trial. *International Journal of Geriatric Psychiatry*. 2009;25(8):850-60.

1  
2  
3 55. Cohen-Mansfield J, Thein K, Marx MS, Dakheel-Ali M, Freedman L. Efficacy of  
4 nonpharmacologic interventions for agitation in advanced dementia: a randomized, placebo-  
5 controlled trial. *J Clin Psychiatry*. 2012;73(9):1255-61.  
6  
7  
8  
9  
10  
11  
12  
13  
14  
15  
16  
17  
18  
19  
20  
21  
22  
23  
24  
25  
26  
27  
28  
29  
30  
31  
32  
33  
34  
35  
36  
37  
38  
39  
40  
41  
42  
43  
44  
45  
46  
47  
48  
49  
50  
51  
52  
53  
54  
55  
56  
57  
58  
59  
60

For peer review only



Table 1. Level of tailoring of interventions

| # | Author (Year)                 | Level of assessment for tailoring                                                                                                                                                                                                                                                                                      | Degree of individualization in design                                                                                                                | Degree of person-centered care in intervention delivery                                                                                                                                                                     | Level of tailoring |
|---|-------------------------------|------------------------------------------------------------------------------------------------------------------------------------------------------------------------------------------------------------------------------------------------------------------------------------------------------------------------|------------------------------------------------------------------------------------------------------------------------------------------------------|-----------------------------------------------------------------------------------------------------------------------------------------------------------------------------------------------------------------------------|--------------------|
| 1 | Orsulic-Jeras et al. (2000)   | Structured assessments of participants' preference using the Montessori-Based Assessment System developed by the authors for selecting appropriate activities for participants                                                                                                                                         | Preserved abilities and preference (Two and above)                                                                                                   | No description                                                                                                                                                                                                              | Medium             |
| 2 | Cohen Mansfield (2006)        | Structured assessments for tailoring relating to participants' medical history, self-identity, and social functioning                                                                                                                                                                                                  | Identity roles, the severity of dementia and ability (Two and above)                                                                                 | High flexibility. Flexibility during implementation could be high as the choice of intervention was at times affected by availability of materials, family members' cooperation and the practicability of the intervention. | High               |
| 3 | Garland et al. (2007)         | No pre-assessments for tailoring                                                                                                                                                                                                                                                                                       | Music preference. (One)                                                                                                                              | No description                                                                                                                                                                                                              | Low                |
| 4 | Cohen-Mansfield et al. (2007) | Structured assessments for tailoring in regard to participants' medical history, self-identity, and social functioning                                                                                                                                                                                                 | Ability, past history and preference (Two and above)                                                                                                 | High flexibility. The study clearly indicated that prevention, accommodation, and flexibility are essential elements of intervention                                                                                        | High               |
| 5 | Gitlin et al. (2008)          | Structured assessments for tailoring. Semi structured investigator-developed interviews to discern daily routines, and the Pleasant Event Schedule to identify previous and current activity interests. Interventionists observed dyadic communication and home environmental features and assessed dementia patients. | Capabilities, previous roles, habits, interests, home environment and dyadic communication (Two and above)                                           | High flexibility. Activity prescriptions were reviewed and modified if necessary during the implementation.                                                                                                                 | High               |
| 6 | Lam et al. (2009)             | Structured assessments for tailoring. Individual functional profiles were mapped with personal selection.                                                                                                                                                                                                              | Abilities, preference, and needs. (Two and above)                                                                                                    | High flexibility. Content of training was dynamic and adjusted to the changing needs of the demented person.                                                                                                                | High               |
| 7 | Dechamps et al. (2009)        | Pre-assessments on physical and psychological functions                                                                                                                                                                                                                                                                | Abilities (One)                                                                                                                                      | Some flexibility. The interventionists were afforded maximum flexibility to address needs of service recipients.                                                                                                            | Medium             |
| 8 | Gitlin et al. (2010)          | Structured assessments for tailoring taking account of PwD's deficits and capabilities, medical testing, home environment, caregiver communication, and caregiver-identified concerns). Interventionists interviewed caregivers to identify patient routines, previous and current roles, habits and interest.         | Home environment, Caregiver-identified concerns and patient capabilities, routines, previous and current roles, habits and interests (Two and above) | High flexibility                                                                                                                                                                                                            | High               |
| 9 | Sung et al. (2010)            | Using the Music Preference Survey and interviews with participants and their family members to assess their music preference and information on the importance of music to life                                                                                                                                        | Music preference (One)                                                                                                                               | Low (participants listened to recorded CDs based on scheduled timeslots)                                                                                                                                                    | Low                |

Table 1. (Continued) Level of tailoring of interventions

| #    | Author (Year)                 | Level of assessment for tailoring                                                                                                                                                                                            | Degree of individualization in design                                              | Degree of person-centered care in intervention delivery                                                                                                                                                    | Level of tailoring |
|------|-------------------------------|------------------------------------------------------------------------------------------------------------------------------------------------------------------------------------------------------------------------------|------------------------------------------------------------------------------------|------------------------------------------------------------------------------------------------------------------------------------------------------------------------------------------------------------|--------------------|
| 10   | Kolanowski et al. (2011)      | Structured assessments on capacities and personality of interest                                                                                                                                                             | Capacity and Preference (Two and above)                                            | High flexibility. The intervention encourages and allows great flexibility for facility staff to use their own clinical judgment and knowledge about residents to tailor and implement individualized M&M. | Medium             |
| 10.1 | Kolanowski et al. (2011)      | Structured assessments on capacities and personality of interest                                                                                                                                                             | Capacity only but opposite to their interests (One)                                | No description                                                                                                                                                                                             | Low                |
| 10.2 | Kolanowski et al. (2011)      | Structured assessments on capacities and personality of interest                                                                                                                                                             | Preference only but activities chosen which were challenging to participants (One) | No description                                                                                                                                                                                             | Low                |
| 11   | Lin et al. (2011)             | Pre-assessment and one-on-one interviews on participants' music preference                                                                                                                                                   | Music Preference (One)                                                             | No description                                                                                                                                                                                             | Low                |
| 12   | Cohen-Mansfield et al. (2012) | Structured assessments concerning participants' medical history, self-identity, and social functioning. The TREA decision tree protocol was used to identify the possible reasons for agitated behaviour, needs, preferences | Past identity, ability and preferences (Two and above)                             | Some flexibility. Research assistants who implemented the intervention were allowed to seek director of therapy's approval for possible adjustment if needed by participants.                              | Medium             |
| 13   | van der Ploeg et al. (2012)   | Structured assessments (Myers Menorah Park/Montessori-Based Assessment System) for tailoring                                                                                                                                 | Preserved abilities and Interest (Two and above)                                   | High flexibility. Facilitators sought to engage residents in selected activities, with flexibility to respond to their perceived level of interest.                                                        | Medium             |
| 14   | Ridder et al. (2013)          | Semi-structured interviews to elicit life-story information either from journal or relatives.                                                                                                                                | Life-story/history, psychosocial needs (Two and above)                             | Low/some flexibility. Interventionists were instructed to be aware of at least three different way of applying music in therapy with PwDs. No specific description.                                        | Medium             |
| 15   | Sakamoto et al. (2013)        | Structural assessments for tailoring to analyze participants' personal life history, and interview with each participant and family member                                                                                   | Music preference, special memories (Two and above)                                 | High flexibility. The facilitators directed participants' attention to the music, and used an interactive approach that responded to participants' emotional reactions to the music.                       | High               |
| 16   | Van Haitsma et al. (2013)     | Pre-assessments                                                                                                                                                                                                              | Interest and ability (Two and above)                                               | Some flexibility. The intervention was adjusted according to the time when residents might be most alert or in need of stimulation or comfort.                                                             | Medium             |
| 17   | Yoon et al. (2013)            | Pre-assessments                                                                                                                                                                                                              | Ability (One)                                                                      | Low flexibility                                                                                                                                                                                            | Low                |
| 18   | Toba et al. (2014)            | Pre-assessment on individual's functional profiles assessed with regard to both abilities and disabilities to evaluate how to enhance abilities and compensate for disabilities                                              | Abilities (One)                                                                    | No description                                                                                                                                                                                             | Medium             |

Table 1. (Continued) Level of tailoring of interventions

| #  | Author (Year)          | Level of assessment for tailoring                                                                                                                                                                                                                                                                    | Degree of individualization in design                                                   | Degree of person-centered care in intervention delivery                                                                                                | Level of tailoring |
|----|------------------------|------------------------------------------------------------------------------------------------------------------------------------------------------------------------------------------------------------------------------------------------------------------------------------------------------|-----------------------------------------------------------------------------------------|--------------------------------------------------------------------------------------------------------------------------------------------------------|--------------------|
| 19 | Holthoff et al. (2015) | Pre-assessments                                                                                                                                                                                                                                                                                      | Ability (One)                                                                           | Low flexibility                                                                                                                                        | Low                |
| 20 | Telenius et al. (2015) | Pre-assessments                                                                                                                                                                                                                                                                                      | Ability (One)                                                                           | No description.                                                                                                                                        | Low                |
| 21 | Davison et al. (2016)  | Pre-assessment. The researchers met with participants and their families to determine the preferred materials to load onto the device.                                                                                                                                                               | Interest only (One)                                                                     | Low flexibility                                                                                                                                        | Low                |
| 22 | Giuli et al. (2016)    | Pre-assessments on patients' cognitive status                                                                                                                                                                                                                                                        | Cognition (One)                                                                         | No description                                                                                                                                         | Low                |
| 23 | Lu et al. (2016)       | Pre-assessments on PwDs' functional ability, types and frequencies of meaningful activity, perceived barriers to engaging in these activities                                                                                                                                                        | Functional ability, types and frequencies of meaningful activity (Two and above)        | No description.                                                                                                                                        | Medium             |
| 24 | Prick et al. (2016)    | Structural assessments for tailoring                                                                                                                                                                                                                                                                 | Physical capacities, information about pleasant activities for the dyad (Two and above) | Medium to High                                                                                                                                         | High               |
| 25 | Bailey et al. (2017)   | No pre-assessments for tailoring. However, after the QAR-depression intervention as part of the intervention component, the group leaders developed the individualized behavioural activity programme for each experimental participant based on information they observed during the group session. | Interest and past history (Two and above)                                               | High flexibility. The group leaders had the flexibility to develop and tailor the individualized behavioural activity programmes during implementation | Medium             |
| 26 | Li et al. (2017)       | The preliminary survey was implemented to investigate participants' preference, cultural background, cognitive function and daily living abilities.                                                                                                                                                  | Interest and capacities (Two and above)                                                 | Some flexibility. The interventionist was allowed to choose activities to match PwDs' ability and interest during personalized activity                | Medium             |
| 27 | Gitlin et al. (2017)   | Structured assessments on participants' capacities, fall risk, daily routines, interests, caregivers (routines, employment, readiness), and environments (lighting, seating, clutter, noise)                                                                                                         | Capabilities, functioning, interest, environment, caregivers (Two and above)            | High flexibility (prescriptions were reviewed and modified if necessary during implementation)                                                         | High               |
| 28 | Tanaka et al. (2017)   | Pre-assessments                                                                                                                                                                                                                                                                                      | Personal history (One)                                                                  | No description.                                                                                                                                        | Low                |

Table 1. (Continued) Level of tailoring of interventions

| #  | Author (Year)          | Level of assessment for tailoring                                                                                                                                                                                                                                                                        | Degree of individualization in design                                                                                                                 | Degree of person-centered care in intervention delivery                                                                                                                                | Level of tailoring |
|----|------------------------|----------------------------------------------------------------------------------------------------------------------------------------------------------------------------------------------------------------------------------------------------------------------------------------------------------|-------------------------------------------------------------------------------------------------------------------------------------------------------|----------------------------------------------------------------------------------------------------------------------------------------------------------------------------------------|--------------------|
| 29 | Novelli et al. (2018)  | Structured assessments to identify preserved capacities, previous interests, frequency/intensity of BPSD in the PWD, communication techniques and daily care routines of caregivers and home environment features. The interventionist applied the assessment findings to design the activity plan.      | Capabilities, previous interests, frequency, and intensity of BPSD in PWD, daily care routines of the caregiver and home environment. (Two and above) | High flexibility. Interventionists are allowed to tailor and adjust the chosen activities to match participants' capabilities during implementation.                                   | High               |
| 30 | Kwak et al. (2018)     | Unstructured interviews with participants and their family members as the best sources for identifying an individual's music preferences                                                                                                                                                                 | Music preference and songs significant to PwDs' life experience (Two and above)                                                                       | High flexibility. The intervention allowed flexibility for facility staff to use their own clinical judgment and knowledge to tailor and implement the M&M programme for each resident | Medium             |
| 31 | Joel et al. (2019)     | Structured assessments: comprehensive individual assessment (physical, medical and psychosocial) and their environment, medication review and adherence, a review of communication with health service providers and cognitive needs and existing strategies.                                            | Capacities/needs, environment (Two and above)                                                                                                         | High flexibility. A multi- and interdisciplinary plan tailored to meet the client's needs to enhance self-care ability using person-centered goal setting.                             | High               |
| 32 | Oliveira et al. (2019) | Structured assessments. Semi structured investigator-developed interview to identify daily routines, and the Pleasant Event Schedule to identify previous and current activity interests. Interventionists observed dyadic communication and home environmental features and assessed dementia patients. | Cognitive and functional capacities, previous abilities, interests, and roles (Two and above)                                                         | High flexibility (prescriptions were reviewed and modified if necessary during the implementation)                                                                                     | High               |
| 33 | O'Connor et al. (2019) | Structured assessments of participants' capacities, fall risk, daily routines, interests, caregivers (routines, employment, readiness), and environments (lighting, seating, clutter, noise)                                                                                                             | Capabilities, functioning, interest, environment, caregivers (Two and above)                                                                          | High flexibility (prescriptions were reviewed and modified if necessary during implementation)                                                                                         | High               |
| 34 | Weise et al. (2020)    | Pre-assessment for participants' personal music preference from family members, nursing staff and directly from participants                                                                                                                                                                             | Preference for music (One)                                                                                                                            | Low flexibility                                                                                                                                                                        | Low                |
| 35 | Huber et al. (2020)    | Pre-assessments                                                                                                                                                                                                                                                                                          | Preference (One)                                                                                                                                      | Low flexibility                                                                                                                                                                        | Low                |

Notes: One = The intervention design was tailored for only one aspect of PWD's characteristics; Two and above = The intervention design was tailored for two and above aspects of PWD's characteristic

1  
2  
3  
4  
5  
6  
7  
8  
9  
10  
11  
12  
13  
14  
15

## FIGURE LEGENDS

Figure 1. Effects of tailored interventions on challenging behaviour at post-intervention (N=20). Notes: SD=Standard Deviation, CI= Confidence Interval, C=activities tailored for capacities of participants only, P = activities tailored for preference of participants only, C+P= activities tailored for capacities and preference of participants. IG = Intervention Group, CG=Control Group.

16  
17  
18  
19  
20  
21  
22

Figure 2. Effects of tailored interventions on quality of life at post-intervention (N=9). Notes: SD=Standard Deviation, CI= Confidence Interval. IG = Intervention Group, CG=Control Group.

23  
24  
25  
26  
27  
28  
29  
30  
31  
32

Figure 3. Subgroup analysis: Effects of tailored interventions on challenging behaviour at post-intervention by level of tailoring (N=20). Notes: SD=Standard Deviation, CI= Confidence Interval, C=activities tailored for capacities of participants only, P = activities tailored for preference of participants only, C+P= activities tailored for capacities and preference of participants. IG = Intervention Group, CG=Control Group.

33  
34  
35  
36  
37  
38  
39  
40  
41  
42  
43  
44  
45  
46  
47  
48  
49  
50  
51  
52  
53  
54  
55  
56  
57  
58  
59  
60

Figure 4. Subgroup analysis: Effects of tailored interventions on quality of life at post-intervention by level of tailoring (N=9). Notes: SD=Standard Deviation, CI= Confidence Interval. IG = Intervention Group, CG=Control Group.

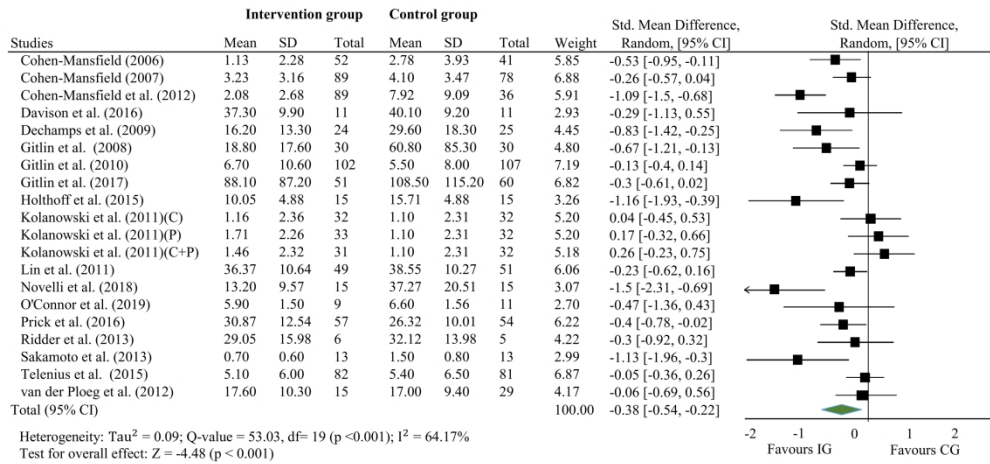

262x123mm (300 x 300 DPI)

1  
2  
3  
4  
5  
6  
7  
8  
9  
10  
11  
12  
13  
14  
15  
16  
17  
18  
19  
20  
21  
22  
23  
24  
25  
26  
27  
28  
29  
30  
31  
32  
33  
34  
35  
36  
37  
38  
39  
40  
41  
42  
43  
44  
45  
46  
47  
48  
49  
50  
51  
52  
53  
54  
55  
56  
57  
58  
59  
60

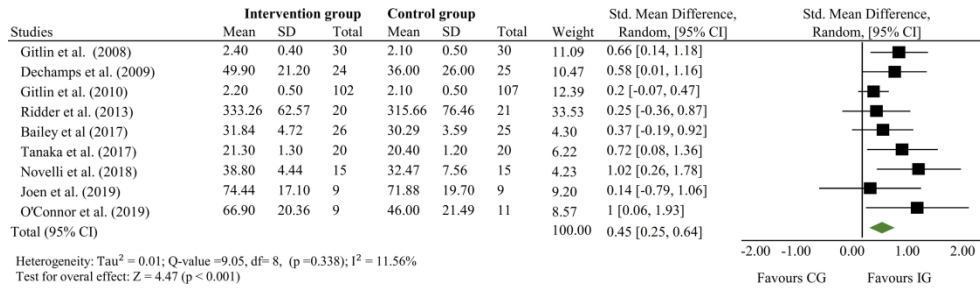

262x81mm (300 x 300 DPI)

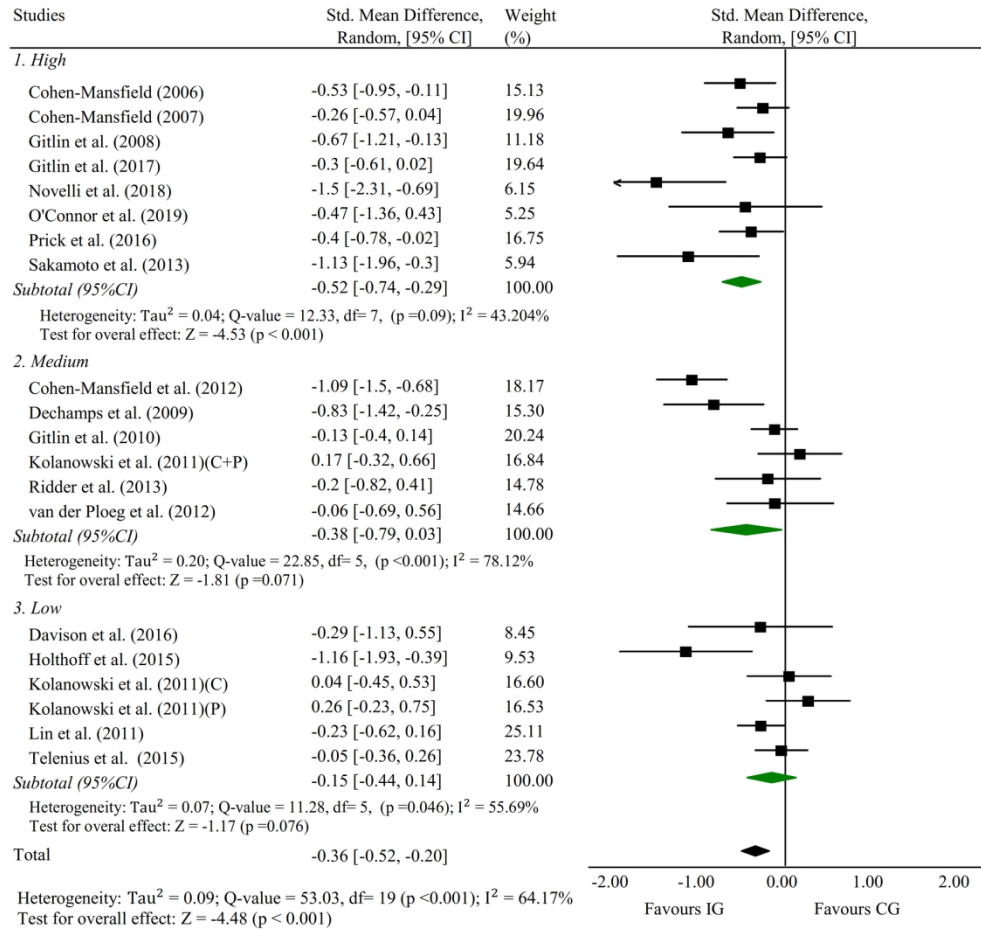

171x159mm (300 x 300 DPI)



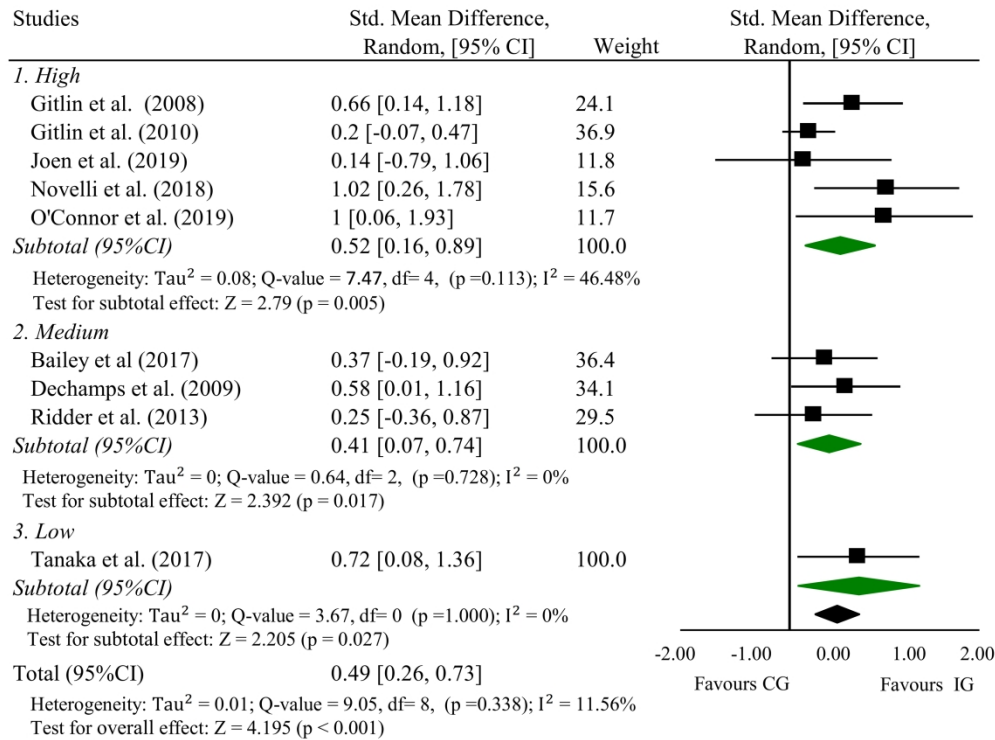

148x113mm (600 x 600 DPI)

Supplementary Table 1. Full search strategy

| Database                                                                 | Search strategy                                                                                                                                                                                                                                                                                                                                                                                                                                                                                                                                                                 |
|--------------------------------------------------------------------------|---------------------------------------------------------------------------------------------------------------------------------------------------------------------------------------------------------------------------------------------------------------------------------------------------------------------------------------------------------------------------------------------------------------------------------------------------------------------------------------------------------------------------------------------------------------------------------|
| <b>ProQuest</b>                                                          | ab("Cognitive impairment" OR "cognitive disorder" OR "dementia" OR "Alzheimer") AND ab("tailor*" OR "engage*" OR "individualized" OR "individual-centered" OR "personalized" OR "personalized" OR "person-centered") AND ab("activities" OR "program" OR "therapy" OR "intervention" OR "treatment*")                                                                                                                                                                                                                                                                           |
| <b>Web of Science</b>                                                    | TS=("Cognitive impairment" OR "cognitive disorder" OR "dementia" OR "Alzheimer" ) AND TS=("tailor*" OR "engage*" OR "individualized" OR "individual-centered" OR "personalized" OR "personalized" OR "person-centered") AND TS=("activities" OR "program*" OR "therapy" OR "intervention" OR "treatment")                                                                                                                                                                                                                                                                       |
| <b>PubMed</b>                                                            | ((("Cognitive impairment"[Title/Abstract] OR "cognitive disorder"[Title/Abstract] OR "dementia"[Title/Abstract] OR "Alzheimer"[Title/Abstract])) AND ("tailor*" [Title/Abstract] OR "engage*" [Title/Abstract] OR "individualized" [Title/Abstract] OR "individual-centered" [Title/Abstract] OR "personalized" [Title/Abstract] OR "personalized" [Title/Abstract] OR "person-centered" [Title/Abstract])) AND ("activities" [Title/Abstract] OR "program*" [Title/Abstract] OR "therapy" [Title/Abstract] OR "intervention" [Title/Abstract] OR "treatment" [Title/Abstract]) |
| <b>Ovid</b>                                                              | [Title and abstract search] (Cognitive impairment OR cognitive disorder OR dementia OR Alzheimer) AND ("tailor*" OR "engage*" OR "individualized" OR "individual-centered" OR "personalized" OR "person-centered") AND ("activities" OR "program" OR "therapy" OR "intervention" OR "treatment*")                                                                                                                                                                                                                                                                               |
| <b>Cochrane Library</b>                                                  | [Title and abstract search] (Cognitive impairment OR cognitive disorder OR dementia OR Alzheimer) AND ("tailor*" OR "engage*" OR "individualized" OR "individual-centered" OR "personalized" OR "person-centered") AND ("activities" OR "program" OR "therapy" OR "intervention" OR "treatment*")                                                                                                                                                                                                                                                                               |
| <b>Cumulative Index to Nursing and Allied Health Literature (CINAHL)</b> | [Title and abstract search] (Cognitive impairment OR cognitive disorder OR dementia OR Alzheimer) AND ("tailor*" OR "engage*" OR "individualized" OR "individual-centered" OR "personalized" OR "person-centered") AND ("activities" OR "program" OR "therapy" OR "intervention" OR "treatment*")                                                                                                                                                                                                                                                                               |

Note: No limit on the publication date

Supplementary Table 2. Level of tailoring of interventions

| Level         | Criteria                                                                                                                                                                                                                                                                                                                                                                                                                                                                                                                                                                          |
|---------------|-----------------------------------------------------------------------------------------------------------------------------------------------------------------------------------------------------------------------------------------------------------------------------------------------------------------------------------------------------------------------------------------------------------------------------------------------------------------------------------------------------------------------------------------------------------------------------------|
| <b>Low</b>    | <ul style="list-style-type: none"> <li>• <b>Pre-assessments</b> for purpose of tailoring were not clearly stated.</li> <li>• Activity design targeted <b>only one domain</b> of tailoring as listed below, including capabilities, preference, interests, life experience, and living environment;</li> <li>• Interventionists had <b>low flexibility and only minimal/marginal modifications</b> were allowed.</li> </ul>                                                                                                                                                        |
| <b>Middle</b> | <ul style="list-style-type: none"> <li>• Pre-assessments for purpose of tailoring were conducted by <b>unstructured, semi-structured interviews</b> only;</li> <li>• Activity design targeted <b>two or more domains</b> of tailoring systematically as listed below, including capabilities, preference, interests, life experience, and external environment;</li> <li>• Interventionists had <b>some flexibility and some modifications</b> could be made based on their professional judgement to accommodate the spontaneous needs of PwD during the intervention</li> </ul> |
| <b>High</b>   | <ul style="list-style-type: none"> <li>• Pre-assessments for the purpose of systematic tailoring were conducted by <b>systematic interviews</b>;</li> <li>• Activity design targeted <b>two or more domains</b> of tailoring systematically as listed below, including capabilities, preference, interests, life experience, and external environment;</li> <li>• Interventionists had <b>high flexibility and any modifications</b> based on their professional judgement to accommodate the spontaneous needs of PwD during the intervention</li> </ul>                         |

Supplementary Table 3. Characteristics of included studies

| #  | Author (Year)<br>[Countries]                    | Age<br>Mean(SD)                  | Dementia<br>types/stage                   | Sample<br>size    | Study design         | Study setting                          |
|----|-------------------------------------------------|----------------------------------|-------------------------------------------|-------------------|----------------------|----------------------------------------|
| 1  | Orsulic-Jeras et al.<br>(2000) [USA]            | I: 88 (4.3)<br>C: 88 (4.3)       | Dementia                                  | I: 16;<br>C: 16   | Quasi-<br>experiment | LTC facility                           |
| 2  | Cohen-Mansfield<br>(2006) [USA]                 | I: 87.2 (6.6)<br>C: 87.3 (7.1)   | Dementia                                  | I: 52;<br>C: 41   | RCT                  | LTC facility and<br>adult day centres  |
| 3  | Garland et al.<br>(2007) [Australia]            | I: 79.0 (66-93)<br>C: 79 (66-93) | Dementia                                  | I: 10;<br>C: 10   | RCT                  | LTC facility                           |
| 4  | Cohen-Mansfield<br>(2007) [USA]                 | I: 88 (6.4)<br>C: 85 (8.6)       | Dementia                                  | I: 89;<br>C: 78   | RCT                  | LTC facility                           |
| 5  | Gitlin et al. (2008)<br>[USA]                   | I: 78 (9.2)<br>C: 80.8 (9.5)     | Dementia                                  | I: 30;<br>C: 30   | RCT                  | Home                                   |
| 6  | Dechamps et al.<br>(2009) [France]              | I: 83.2 (8.3)<br>C: 83.2 (8.3)   | Dementia                                  | I: 24;<br>C: 25   | RCT                  | Hospital                               |
| 7  | Gitlin et al. (2010)<br>[USA]                   | I: 83.1 (7.8)<br>C: 81.8 (9.9)   | Dementia                                  | I: 102;<br>C: 107 | RCT                  | Community                              |
| 8  | Lam et al. (2010)<br>[Hong Kong]                | I: 83.1 (6.9)<br>C: 83.8 (7)     | Dementia                                  | I: 37;<br>C: 37   | RCT                  | LTC facility                           |
| 9  | Sung et al. (2010)<br>[Taiwan]                  | I: 78.1 (7.2)<br>C: 82.7 (7.4)   | Dementia                                  | I: 29;<br>C: 23   | Quasi-<br>experiment | LTC facility                           |
| 10 | Kolanowski et al.<br>(2011) [USA]               | I: 86 (7.1)<br>C: 85.9 (4.9)     | Dementia                                  | I: 31;<br>C: 32   | RCT                  | LTC facility                           |
| 11 | Lin et al. (2011)<br>[Taiwan]                   | I: 81.5 (7.3)<br>C: 82.2 (6.3)   | Dementia                                  | I: 49;<br>C: 51   | RCT                  | LTC facility                           |
| 12 | Cohen-Mansfield et<br>al. (2012) [USA]          | I: 85.9 (8.6)<br>C: 85.3 (9.6)   | Dementia                                  | I: 89;<br>C: 36   | RCT                  | LTC facility                           |
| 13 | van der Ploeg et al.<br>(2012) [Australia]      | I: 78.1 (9.8)<br>C: 78.1 (9.8)   | Dementia                                  | I: 15;<br>C: 29   | Crossover<br>RCT     | LTC facility                           |
| 14 | Ridder et al. (2013)<br>[Denmark and<br>Norway] | I: 82.2 (8.8)<br>C: 80.2 (8.7)   | Dementia                                  | I: 6;<br>C: 5     | RCT                  | LTC facility                           |
| 15 | Sakamoto et al.<br>(2013) [Japan]               | I: 80.4 (7.4)<br>C: 81.5 (7.9)   | Dementia                                  | I: 13;<br>C: 13   | RCT                  | Hospital                               |
| 16 | Van Haitsma et al.<br>(2013) [USA]              | I: 87.7 (8.7)<br>C: 89.2 (6.9)   | Dementia                                  | I: 44;<br>C: 93   | RCT                  | LTC facility                           |
| 17 | Yoon et al. (2013)<br>[Korea]                   | I: 77.9 (7.5)<br>C: 70.1 (12.2)  | Dementia                                  | I: 11;<br>C: 9    | RCT                  | LTC facility                           |
| 18 | Toba et al. (2014)<br>[Japan]                   | I: 84.1 (7.1)<br>C: 87.3 (7.1)   | Dementia                                  | I: 158;<br>C: 54  | Quasi-<br>experiment | Geriatric health<br>service facilities |
| 19 | Holthoff et al.<br>(2015) [Germany]             | I: 72.4 (4.3)<br>C: 70.7 (5.4)   | Early and<br>moderate<br>stage AD         | I: 15;<br>C: 15   | RCT                  | Home                                   |
| 20 | Telenius et al.<br>(2015) [Norway]              | I: 86.9 (7)<br>C: 86.4 (7.8)     | mild or<br>moderate                       | I: 82;<br>C: 81   | RCT                  | LTC facility                           |
| 21 | Davison et al.<br>(2016)<br>[Australia]         | I: 86 (5.2)<br>C: 86 (5.2)       | Dementia                                  | I: 11;<br>C: 11   | RCT                  | LTC facility                           |
| 22 | Giuli et al. (2016)<br>[Italy]                  | I: 76 (6.3)<br>C: 76.5 (5.7)     | Mild cognitive<br>impairment/D<br>ementia | I: 48;<br>C: 49   | RCT                  | Hospital                               |
| 23 | Lu et al. (2016)<br>[USA]                       | I: 71.2 (0.8)<br>C: 76.5 (7.1)   | Mild cognitive<br>impairment              | I: 20;<br>C: 20   | RCT                  | Community                              |

Notes: I = Intervention group; C = control group; RCT = randomized clinical trial; LTC = long-term care

Supplementary Table 3. (Continued) Characteristics of included studies

| #  | Author (Year)<br>[Countries]          | Age<br>Mean(SD)                | Dementia<br>types/stage                  | Sample<br>size  | Study<br>design      | Study setting                        |
|----|---------------------------------------|--------------------------------|------------------------------------------|-----------------|----------------------|--------------------------------------|
| 24 | Prick et al. (2016)<br>[Netherlands]  | I: 76 (7.6)<br>C: 78 (7.2)     | Dementia                                 | I: 57;<br>C: 54 | RCT                  | Home                                 |
| 25 | Bailey et al (2017)<br>[USA]          | I: 84.4 (7.7)<br>C: 83.9 (9.2) | Mild to moderate<br>cognitive impairment | I: 26;<br>C: 25 | RCT                  | LTC facility                         |
| 26 | Li et al. (2017)<br>[China]           | I: 83.1 (4.1)<br>C: 81.1 (6.7) | Dementia                                 | I: 19;<br>C: 21 | Quasi-<br>experiment | LTC facility                         |
| 27 | Gitlin et al. (2017)<br>[USA]         | I: 80.4 (8.7)<br>C: 80.4 (8.7) | Dementia                                 | I: 51;<br>C: 60 | RCT                  | Home                                 |
| 28 | Tanaka et al. (2017)<br>[Japan]       | I: 86 (7.4)<br>C: 86.5 (8.3)   | Dementia                                 | I: 20;<br>C: 20 | RCT                  | Geriatric health<br>service facility |
| 29 | Novelli et al. (2018)<br>[Brazil]     | I: 79.4 (7.7)<br>C: 83.5 (7.1) | Dementia                                 | I: 15;<br>C: 15 | RCT                  | Community                            |
| 30 | Kwak et al. (2018)<br>[USA]           | I: 88.9 (5.4)<br>C: 84.9 (8.6) | Dementia or<br>Alzheimer's disease       | I: 30;<br>C: 29 | Crossover<br>RCT     | LTC facility                         |
| 31 | Joel et al. (2019)<br>[Australia]     | I: 79.0 (N.A)<br>C: 81.0 (N.A) | Mild cognitive<br>impairment/Dementia    | I: 9;<br>C: 9   | RCT                  | Home                                 |
| 32 | de Oliveira et al.<br>(2019) [Brazil] | I: 79 (5.7)<br>C: 78.4 (6.2)   | Dementia                                 | I: 11;<br>C: 10 | RCT                  | Community<br>medical centers         |
| 33 | O'Connor et al.<br>(2019) [Australia] | I: 62.1 (N.A)<br>C: 65.6 (N.A) | Dementia                                 | I: 9;<br>C: 11  | RCT                  | Home                                 |
| 34 | Weise et al. (2020)<br>[Germany]      | I: 85.1 (5.9)<br>C: 85.1 (5.9) | Moderate or severe<br>stages of Dementia | I: 10;<br>C: 10 | RCT                  | LTC facility                         |
| 35 | Huber et al. (2020)<br>[Switzerland]  | I: 74-92<br>C: 74-92           | Moderate to severe<br>stages of dementia | I: 10;<br>C: 13 | Quasi-<br>experiment | Community                            |

Notes: I = Intervention group; C = control group; RCT = randomized clinical trial; LTC = long-term care

Supplementary Table 4. Interventions and activities tailored for participants' characteristics

| # | Author (Year)               | PWD's characteristics                                                                                                                | Types | Content of tailored activities/intervention                                                                                                                                                                                                                                                                                                                                                           | Delivery                                                                                                       | Comparator | Outcomes                                                  | Findings                                                                                |
|---|-----------------------------|--------------------------------------------------------------------------------------------------------------------------------------|-------|-------------------------------------------------------------------------------------------------------------------------------------------------------------------------------------------------------------------------------------------------------------------------------------------------------------------------------------------------------------------------------------------------------|----------------------------------------------------------------------------------------------------------------|------------|-----------------------------------------------------------|-----------------------------------------------------------------------------------------|
| 1 | Orsulic-Jeras et al. (2000) | Preserved abilities                                                                                                                  | MP    | Montessori-Based Activities included individual-based and group activities. In individual activities, various aesthetically pleasing materials taken from the everyday environment were used. Group activities include memory bingo and group sorting.                                                                                                                                                | Mode: Mixed; Interventionist: Research assistant/activities therapist; Duration: 3 months. Follow-up: 6 months | usual care | Level of engagement                                       | IG showed more engagement than CG at post-intervention.                                 |
| 2 | Cohen-Mansfield (2006)      | Salience of identity roles, the severity of the dementia, ability                                                                    | MP    | Role-identity-based treatment involved a 2-step procedure, including the determination of role-identity salience and the determination of the intervention. Chosen activities were tailored for the roles identified. For example, a participant with a great sense of professional accomplishment enjoyed looking at his awards.                                                                     | Mode: Individual; Interventionist: Research assistants; Duration: 5 days.                                      | usual care | BPSDs (Agitation), Engagement and Depression.             | IG showed more increase in engagement and fewer BPSDs in the treatment than CG.         |
| 3 | Garland et al. (2007)       | Preferred songs, performers and titles.                                                                                              | MU    | Preferred music selected based on family members' reports of participants' reference.                                                                                                                                                                                                                                                                                                                 | Mode: Individual; Interventionist: Researcher; Duration: 4 weeks.                                              | usual care | BPSDs (Overall)                                           | No significant difference in reducing BPSDs between IG and CG.                          |
| 4 | Cohen-Mansfield (2007)      | Ability, past history and preference                                                                                                 | MP    | Nonpharmacologic individualized interventions based on TREA framework                                                                                                                                                                                                                                                                                                                                 | Mode: Mixed; Interventionist: Research assistants; Duration: 10 days. No follow-up assessment.                 | placebo    | BPSDs                                                     | IG showed decreases in overall BPSDs compared to CG at post-intervention.               |
| 5 | Gitlin et al. (2008)        | Capabilities, previous roles, habits and interests                                                                                   | MP    | TAP is based on the environmental vulnerability/reduced stress-threshold model, including a three-stage intervention: (1) structural assessments, (2) activity prescriptions, chosen activities tailored to match the PWD's characteristics, providing training to and working with caregivers in the implementation, and (3) helping caregivers to generalize strategies for future care challenges. | Mode: Individual; Interventionist: Occupational therapists and caregivers; Duration: 4 months.                 | wait-list  | BPSDs (overall), QoL, depression, and level of engagement | IG showed greater reduction in frequency of BPSDs and greater engagement than CG.       |
| 6 | Dechamps et al. (2009)      | Abilities and discourse                                                                                                              | MP    | The Cognition-Action method does not rely on the use of a specific exercise, but rather is a guidance method intended to enhance active living and social interaction using motor actions as incentives.                                                                                                                                                                                              | Mode: Individual; Interventionist: Research assistants; Duration: 12 weeks.                                    | usual care | BPSDs (Overall), QoL, and depression                      | IG showed greater reduction in BPSDs, depression and improvement in QoL compared to CG. |
| 7 | Gitlin et al. (2010)        | Home environment, Caregiver-identified concerns and patient capabilities, routines, previous and current roles, habits and interests | MP    | Care of Persons with Dementia in their Environments (COPE) targeted modifiable environmental stressors to decrease sensorial, physical, and cognitive demands, align with patient capabilities, and re-engage patients in daily activities.                                                                                                                                                           | Mode: Individual; Interventionist: Occupational therapists; Duration: 4 months. Follow-up: 9 months            | usual care | BPSDs, QoL and engagement                                 | IG showed increases in the level of engagement compared to the CG at post-intervention. |

Supplementary Table 4. (Continued) Interventions and activities tailored for participants' characteristics

| #  | Author (Year)                 | PWD's characteristics                           | Types | Content of tailored activities/intervention                                                                                                                                                                                                                                                                                                                        | Delivery                                                                                            | Comparator        | Outcomes                         | Findings                                                                            |
|----|-------------------------------|-------------------------------------------------|-------|--------------------------------------------------------------------------------------------------------------------------------------------------------------------------------------------------------------------------------------------------------------------------------------------------------------------------------------------------------------------|-----------------------------------------------------------------------------------------------------|-------------------|----------------------------------|-------------------------------------------------------------------------------------|
| 8  | Lam et al. (2010)             | Abilities, preference, needs                    | P     | Individualized functional training programme                                                                                                                                                                                                                                                                                                                       | Mode: Individual; Interventionist: Occupational therapists; Duration: 8 weeks. Follow-up: 4 months  | Attention control | BPSD (Depression) and cognition  | IG showed reduction in depression compared to CG only at 4-month follow up.         |
| 9  | Sung et al. (2010)            | Music preference                                | MU    | Preferred music listening intervention                                                                                                                                                                                                                                                                                                                             | Mode: Individual; Interventionist: Trained nursing staff; Duration: 6 weeks.                        | usual care        | BPSD (Depression/Anxiety)        | IG had a lower anxiety score compared with CG.                                      |
| 10 | Kolanowski et al. (2011)      | Functional level, personality style of interest | MP    | Activities derived from the Need driven Dementia-compromised Behavior model which were tailored to the resident's functional level (cognitive and physical) and personality style of interest<br>3-arm intervention group design:<br>(1) Personality style of interest group (PI); (2) Functional level (FL); (3) PI + FL                                          | Mode: Group ; Interventionist: Nursing staff; Duration: 3 weeks                                     | Active control    | BPSDs (Agitation) and Engagement | IG (PI) showed greater engagement than the other groups.                            |
| 11 | Lin et al. (2011)             | Music Preference                                | MU    | Group music intervention                                                                                                                                                                                                                                                                                                                                           | Mode: Group; Interventionist: Researcher; Duration: 6 weeks. One-month follow up.                   | usual care        | BPSDs (Agitation)                | IG showed reduction in BPSDs compared to the CG at post-intervention and follow-up. |
| 12 | Cohen-Mansfield et al. (2012) | Past identity, ability and preferences          | MP    | The TREA decision tree protocol was used to identify the possible reasons for agitated behaviour, needs, and preferences of participants. The activities included simulated animal-assisted therapy, one-on-one interaction, simulated interaction, group activities, arts and crafts, physical activities, games and music based on participants' preference etc. | Mode: Mixed; Interventionist: Research assistants; Duration: 2 weeks.                               | placebo           | BPSDs (Agitation)                | IG showed reduction in total agitation compared to CG.                              |
| 13 | van der Ploeg et al. (2012)   | preserved abilities and Interest                | MP    | Montessori-based activities                                                                                                                                                                                                                                                                                                                                        | Mode: Mixed; Interventionist: Psychologists and higher degree psychology student; Duration: 4 weeks | usual care        | BPSDs, engagement                | IG showed more engagement than control group.                                       |
| 14 | Ridder et al. (2013)          | life-story/history                              | MU    | Individual music therapy                                                                                                                                                                                                                                                                                                                                           | Mode: Individual; Interventionist: Clinicians; Duration: 6 weeks. Follow-up: 7 weeks.               | usual care        | BPSDs (Agitation), QoL           | IG showed reduction in total agitation compared to CG at post-intervention.         |

Supplementary Table 4. (Continued) Interventions and activities tailored for participants' characteristics

| #  | Author (Year)             | PWD's characteristics | Types | Content of tailored activities/intervention                                                                                                                                                                                                 | Delivery                                                                                              | Comparator        | Outcomes                               | Findings                                                                                                                                                   |
|----|---------------------------|-----------------------|-------|---------------------------------------------------------------------------------------------------------------------------------------------------------------------------------------------------------------------------------------------|-------------------------------------------------------------------------------------------------------|-------------------|----------------------------------------|------------------------------------------------------------------------------------------------------------------------------------------------------------|
| 15 | Sakamoto et al. (2013)    | Music preference      | MU    | Individualized music interventions                                                                                                                                                                                                          | Mode: Individual; Interventionist: Music facilitator; Duration: 10 weeks.                             | usual care        | BPSDs (overall)                        | Greater long-term reduction in BPSD was observed in IG compared with CG.                                                                                   |
| 16 | Van Haitsma et al. (2013) | Interest and ability  | MP    | Individualized Positive Psychosocial Intervention based on participants' leisure interests that included physical exercise, music, ADLs, reminiscence and sensory stimulation.                                                              | Mode: Individual; Interventionist: Certified nursing assistants; Duration: 3 weeks                    | Attention control | BPSDs (overall)                        | IG experienced more pleasure, alertness, engagement, positive touch, and positive verbal behavior compared with CG.                                        |
| 17 | Yoon et al. (2013)        | Ability level         | MP    | Cognitive activity combined with physical exercise                                                                                                                                                                                          | Mode: Group ; Interventionist: Unspecified; Duration: 12 weeks                                        | Attention control | Depression                             | IG showed improvement in cognition and reduction in depression compared to CG.                                                                             |
| 18 | Toba et al. (2014)        | Abilities and needs   | MP    | Intensive rehabilitation programme included reminiscence, reality orientation, memory rehabilitation, music therapy, physical exercise, occupational therapy, speech communication therapy and learning sessions                            | Mode: Individual; Interventionist: Physical, occupational or speech therapists; Duration: 3 months    | usual care        | BPSD, depression,                      | IG showed more reduction in BPSD and improvement in cognition compared to CG.                                                                              |
| 19 | Holthoff et al. (2015)    | Ability level         | P     | Physical Activity Training. Patients in the intervention group trained their lower body on a movement trainer with individually preassigned training flow. Caregivers were asked to choose a familiar chair prior to commencement of study. | Mode: Unspecified; Interventionist: Caregivers/ computer; Duration: 12 weeks. 3-month follow up test. | usual care        | BPSD                                   | Intervention group experienced remained stable in BPSDs while control group experienced increases in BPSDs at follow-up.                                   |
| 20 | Telenius et al. (2015)    | Performance levels    | P     | Individually fitted High-Intensity Exercise Program                                                                                                                                                                                         | Mode: Individual; Interventionist: Physiotherapist; Duration: 12 weeks                                | Attention control | BPSD, QoL, depression,                 | IG experienced more reduction in BPSD compared to CG.                                                                                                      |
| 21 | Davison et al. (2016)     | Interest              | C     | Using a personal computer to play favourite music and display photographs, movies and messages selected by participants and family members                                                                                                  | Mode: Individual; Interventionist: Research staff; Duration: 4 weeks                                  | usual care        | BPSDs (Agitation), Depression, Anxiety | IG experienced reduction in depression and anxiety compared to CG.                                                                                         |
| 22 | Giuli et al. (2016)       | cognitive function    | C     | Nonpharmacological intervention consisting of comprehensive cognitive training                                                                                                                                                              | Mode: Individual; Interventionist: Experienced psychologists; Duration: 10 weeks                      | usual care        | Depression and cognition               | Compared to CG, IG with Alzheimer's disease experienced improvement in cognition. Improvement in cognition of IG with mild cognitive impairment was found. |



Supplementary Table 4. (Continued) Interventions and activities tailored for participants' characteristics

| #  | Author (Year)         | PWD's characteristics                                                                                                                                    | Types | Content of tailored activities/intervention                                                                                                                                                                                                                                                                                                                                    | Delivery                                                                                                                           | Comparator        | Outcomes                       | Findings                                                                                                                                                                    |
|----|-----------------------|----------------------------------------------------------------------------------------------------------------------------------------------------------|-------|--------------------------------------------------------------------------------------------------------------------------------------------------------------------------------------------------------------------------------------------------------------------------------------------------------------------------------------------------------------------------------|------------------------------------------------------------------------------------------------------------------------------------|-------------------|--------------------------------|-----------------------------------------------------------------------------------------------------------------------------------------------------------------------------|
| 23 | Lu et al. (2016)      | Congruence in level of awareness of functional ability, types and frequencies of meaningful activity, perceived barriers to engaging in these activities | MP    | Daily Engagement of Meaningful Activities using the principles of problem-solving therapy and, consistent with the overall goals of this intervention, providing autonomy support by helping patients identify and prioritize meaningful activities, identify needs and goals, generate manageable solutions, and engage in self-selected activities with family support, etc. | Mode: Group; Interventionist: Trained nurse; Duration: 2 weeks. Follow up: 3 months                                                | Attention control | BPSD (Depression)              | IG showed less improvement in depressive symptoms than CG at follow-up.                                                                                                     |
| 24 | Prick et al. (2016)   | Physical capacities, information about pleasant activities for the dyad                                                                                  | MP    | Multicomponent dyadic intervention comprising physical exercise training, psychoeducation, communication skills training, and pleasant activities training.                                                                                                                                                                                                                    | Mode: Individual; Interventionist: Personal coach; Duration: 3 months. 6 month follow up.                                          | usual care        | BPSDs, depression, health      | Analyses showed no beneficial effects over time on any of the outcome measures.                                                                                             |
| 25 | Bailey et al. (2017)  | participant's specific area of interest                                                                                                                  | MP    | Multicomponent intervention including group activity sessions using question-asking-reading (QAR), reminiscence, cognitive-behavioural therapy techniques, environmental support and individualized behavioural activity programme.                                                                                                                                            | Mode: Group; Interventionist: Two upper-level graduate students in clinical psychology and one PhD psychologist; Duration: 6 weeks | usual care        | Depression, QoL and engagement | IG showed more improvement in depression than CG.                                                                                                                           |
| 26 | Li et al. (2017)      | Interest, capacities and culture background                                                                                                              | MP    | Folk recreation programme plus personalized training on daily life activities and individual activity programme according to participants' interest.                                                                                                                                                                                                                           | Mode: Mixed; Interventionist: Researcher; Duration: 16 weeks                                                                       | usual care        | BPSD                           | The folk recreation program has the potential to improve cognitive function, ability of daily living and behavioral and psychological symptoms of the elders with dementia. |
| 27 | Gitlin et al. (2017)  | Capabilities, functioning, interest, environment, caregivers                                                                                             | MP    | Tailored activity programme                                                                                                                                                                                                                                                                                                                                                    | Mode: Individual; Interventionist: Occupational therapists; Duration: 4 months                                                     | Attention control | BPSDs                          | Intervention group showed reduction in BPSDs and functional dependence.                                                                                                     |
| 28 | Tanaka et al. (2017)  | Meaningfulness, personal history                                                                                                                         | MP    | Personal rehabilitation comprising cognitive rehabilitation and involving reminiscence therapy, reality orientation, and physical activity.                                                                                                                                                                                                                                    | Mode: Mixed; Interventionist: Staff member ; Duration: 12 weeks                                                                    | usual care        | Depression & QoL               | No statistically significant differences between IG and CG in interested outcomes.                                                                                          |
| 29 | Novelli et al. (2018) | Capabilities, previous interests, frequency, and intensity of BPSD in PWD, daily care routines of the caregiver and home environment.                    | MP    | Tailored activity programme                                                                                                                                                                                                                                                                                                                                                    | Mode: Individual; Interventionist: Occupational therapy, caregiver; Duration: 4 months                                             | wait-list         | BPSD and QoL                   | IG experienced reduced in BPSD and improvement in QoL compared to CG                                                                                                        |

Supplementary Table 4. (Continued) Interventions and activities tailored for participants' characteristics

| #  | Author (Year)             | PWD's characteristics                                                         | Types | Content of tailored activities/intervention                                                                                                                                                                                                                                                                                                                                  | Delivery                                                                                                                                 | Comparator        | Outcomes           | Findings                                                                                                                                        |
|----|---------------------------|-------------------------------------------------------------------------------|-------|------------------------------------------------------------------------------------------------------------------------------------------------------------------------------------------------------------------------------------------------------------------------------------------------------------------------------------------------------------------------------|------------------------------------------------------------------------------------------------------------------------------------------|-------------------|--------------------|-------------------------------------------------------------------------------------------------------------------------------------------------|
| 30 | Kwak et al. (2018)        | Music preference                                                              | MU    | A passive music intervention using personalized music playlists delivered on digital music players.                                                                                                                                                                                                                                                                          | Mode: Individual; Interventionist: Nursing home staff; Duration: 14 weeks                                                                | usual care        | BPSD               | No statistically significant differences between IG and CG in any of the outcomes measured.                                                     |
| 31 | Joen et al. (2019)        | Capacities/needs, environment                                                 | MP    | A multi- and interdisciplinary plan tailored to meet the client's needs to enhance self-care ability and using person-centred goal setting included cognitive rehabilitation techniques, energy conservation and task simplification strategies, balance and strength exercises, pain relief management, anxiety management, problem solving, and medication simplification. | Mode: Individual; Interventionist: Occupational therapists, registered nurse, neuropsychologist; Duration: 4 months. 12 month follow-up. | usual care        | Depression and QoL | No statistically significant differences between IG and CG in any of the outcomes measured.                                                     |
| 32 | de Oliveira et al. (2019) | Cognitive and functional capacities, previous abilities, interests, and roles | MP    | Tailored activity programme                                                                                                                                                                                                                                                                                                                                                  | Mode: Individual; Interventionist: Occupational therapists; Duration: 3 months                                                           | Attention control | BPSD               | Compared to CG, IGS experienced reduction in BPSD.                                                                                              |
| 33 | O'Conn or et al. (2019)   | Capabilities, functioning, interest, environment, caregivers                  | MP    | Tailored activity programme                                                                                                                                                                                                                                                                                                                                                  | Mode: Individual; Interventionist: Occupational therapists; Duration: 4 months                                                           | usual care        | BPSDs and QoL      | IG showed an overall reduction of behavioral symptoms and maintenance of functional performance in the person with dementia, compared to CG.    |
| 34 | Weise et al. (2020)       | Preference for music                                                          | MU    | Individualized recorded music                                                                                                                                                                                                                                                                                                                                                | Mode: Individual; Interventionist: Social service staff and project staff; Duration: 4 weeks                                             | wait-list         | BPSD               | No significant findings on reduction in BPSD between IG and CG.                                                                                 |
| 35 | Huber et al. (2020)       | Preference, meaningfulness                                                    | MP    | Individualized music listening                                                                                                                                                                                                                                                                                                                                               | Mode: Individual; Interventionist: Caregivers/staff member; Duration: 4 weeks                                                            | usual care        | BPSD, depression   | Depression scores decreased significantly over time while agitated behavior showed a constant moderate level without any significant decreases. |

Note: P=physical; C=cognitive; MU=musical; MP=multiple; TAP = Tailored Activity Programme. IG=intervention group; CG=control group. BPSD = behavioural and psychological symptoms of dementia; QoL=Quality of life.

Supplementary Figure 1. Flowchart of included articles

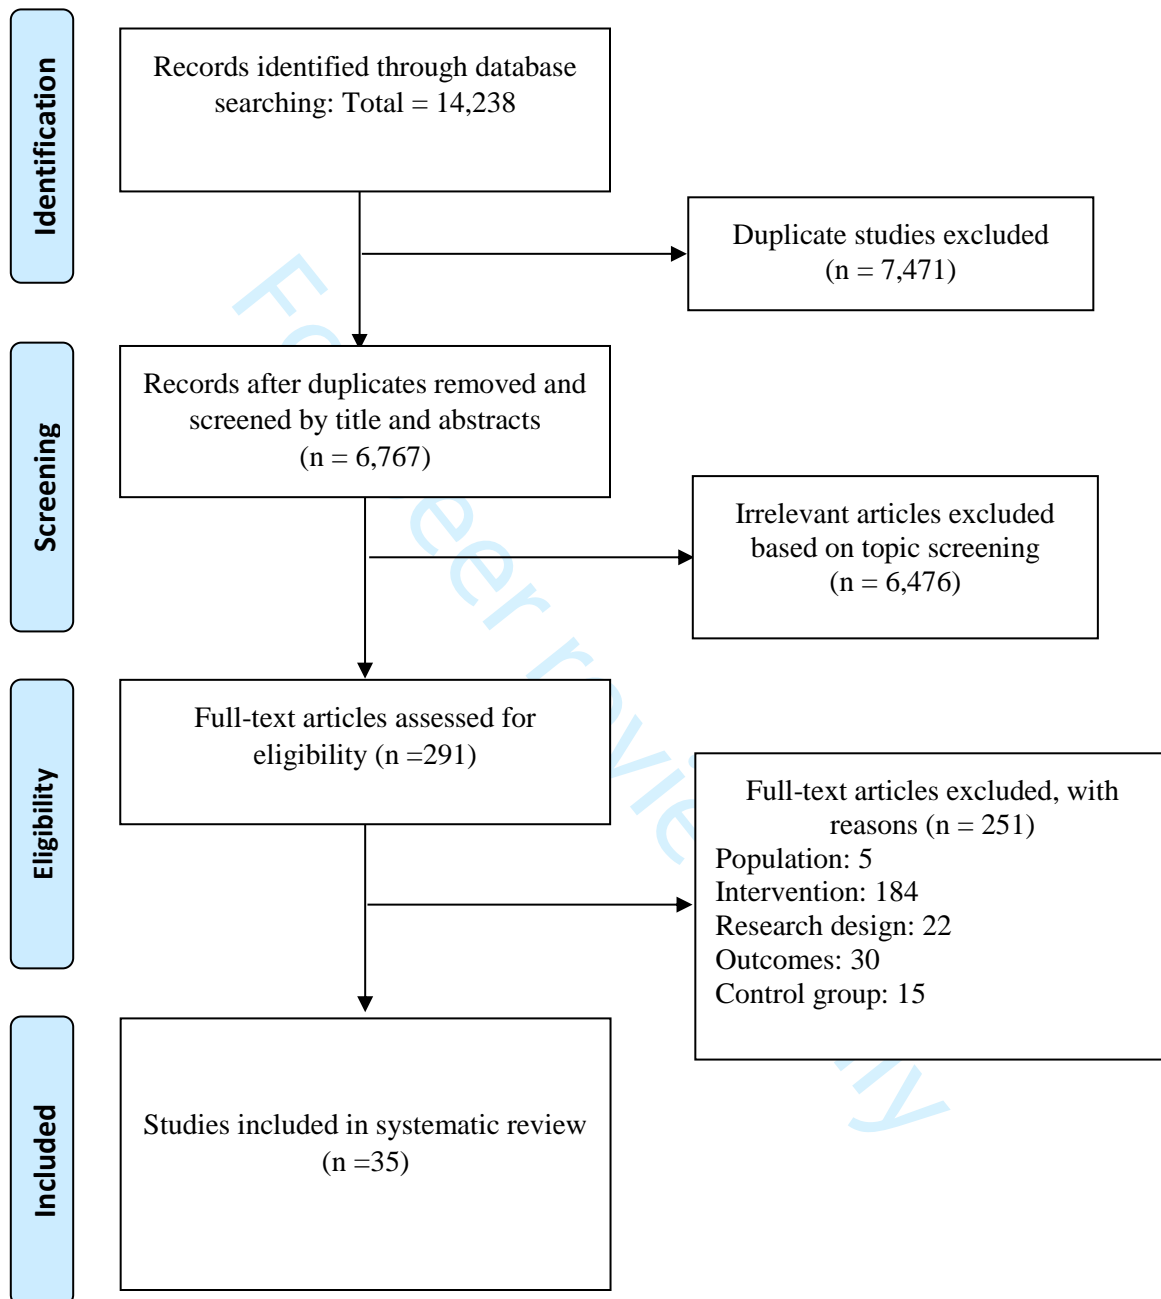

Supplementary Figure 2. Risk of Bias Graph for RCT studies (N=30)

| Study                         | Randomization process | Deviations from intended interventions | Missing outcome data | Measurement of the outcome | Selection of the reported result | Overall |
|-------------------------------|-----------------------|----------------------------------------|----------------------|----------------------------|----------------------------------|---------|
| Cohen Mansfield (2006)        | ?                     | ?                                      | +                    | ?                          | ?                                | !       |
| Garland et al. (2007)         | ?                     | ?                                      | +                    | +                          | ?                                | !       |
| Cohen-Mansfield (2007)        | ?                     | -                                      | +                    | -                          | +                                | -       |
| Gitlin et al. (2008)          | +                     | +                                      | +                    | +                          | +                                | +       |
| Dechamps et al. (2009)        | +                     | +                                      | +                    | +                          | +                                | +       |
| Gitlin et al. (2010)          | +                     | +                                      | +                    | +                          | +                                | +       |
| Lam et al. (2010)             | +                     | +                                      | +                    | +                          | +                                | +       |
| Kolanowski et al. (2011)      | +                     | +                                      | +                    | +                          | +                                | +       |
| Lin et al. (2011)             | +                     | -                                      | +                    | -                          | ?                                | -       |
| Cohen-Mansfield et al. (2012) | +                     | +                                      | +                    | +                          | +                                | +       |
| van der Ploeg et al. (2012)   | +                     | -                                      | +                    | +                          | +                                | -       |
| Ridder et al. (2013)          | +                     | ?                                      | +                    | ?                          | ?                                | !       |
| Sakamoto et al. (2013)        | ?                     | ?                                      | +                    | +                          | +                                | !       |
| Van Haitsma et al. (2013)     | +                     | ?                                      | +                    | +                          | +                                | !       |
| Yoon et al. (2013)            | +                     | -                                      | -                    | -                          | +                                | -       |
| Holthoff et al. (2015)        | +                     | -                                      | +                    | -                          | ?                                | -       |
| Telenius et al. (2015)        | +                     | -                                      | +                    | +                          | ?                                | -       |
| Davison et al. (2016)         | +                     | -                                      | +                    | +                          | ?                                | -       |
| Giuli et al. (2016)           | ?                     | -                                      | -                    | -                          | +                                | -       |
| Lu et al. (2016)              | +                     | +                                      | +                    | +                          | +                                | +       |
| Prick et al. (2016)           | +                     | +                                      | +                    | +                          | +                                | +       |
| Bailey et al (2017)           | +                     | -                                      | +                    | -                          | +                                | -       |
| Gitlin et al. (2017)          | +                     | +                                      | +                    | +                          | +                                | +       |
| Tanaka et al. (2017)          | +                     | -                                      | -                    | +                          | +                                | -       |
| Novelli et al. (2018)         | +                     | ?                                      | +                    | +                          | +                                | !       |
| Kwak et al. (2018)            | +                     | -                                      | -                    | -                          | +                                | -       |
| Joen et al. (2019)            | +                     | +                                      | +                    | +                          | +                                | +       |
| de Oliveira et al. (2019)     | ?                     | ?                                      | -                    | +                          | +                                | -       |
| O'Connor et al. (2019)        | +                     | ?                                      | +                    | +                          | +                                | !       |
| Weise et al. (2020)           | +                     | +                                      | ?                    | ?                          | +                                | !       |

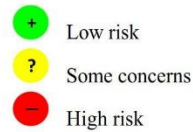

Supplementary Figure 3. Risk of Bias Graph for quasi-experimental studies (N=5)

| Study                       | Risk of bias domains |    |    |    |    |    |    | Overall |
|-----------------------------|----------------------|----|----|----|----|----|----|---------|
|                             | D1                   | D2 | D3 | D4 | D5 | D6 | D7 |         |
| Toba et al. (2014)          | +                    | +  | +  | +  | +  | -  | +  | -       |
| Li et al. (2017)            | +                    | +  | +  | +  | +  | -  | +  | -       |
| Sung et al. (2010)          | +                    | +  | +  | +  | ?  | -  | +  | ?       |
| Huber et al. (2020)         | +                    | ?  | +  | +  | +  | -  | +  | ?       |
| Orsulic-Jeras et al. (2000) | +                    | +  | ?  | -  | ?  | -  | +  | ?       |

Domains:  
D1: Bias due to confounding.  
D2: Bias due to selection of participants.  
D3: Bias in classification of interventions.  
D4: Bias due to deviations from intended interventions.  
D5: Bias due to missing data.  
D6: Bias in measurement of outcomes.  
D7: Bias in selection of the reported result.

Judgement  
- Moderate  
+ Low  
? No information

Supplementary Figure 4. Effects of tailored interventions on depression at post-intervention (N=14)

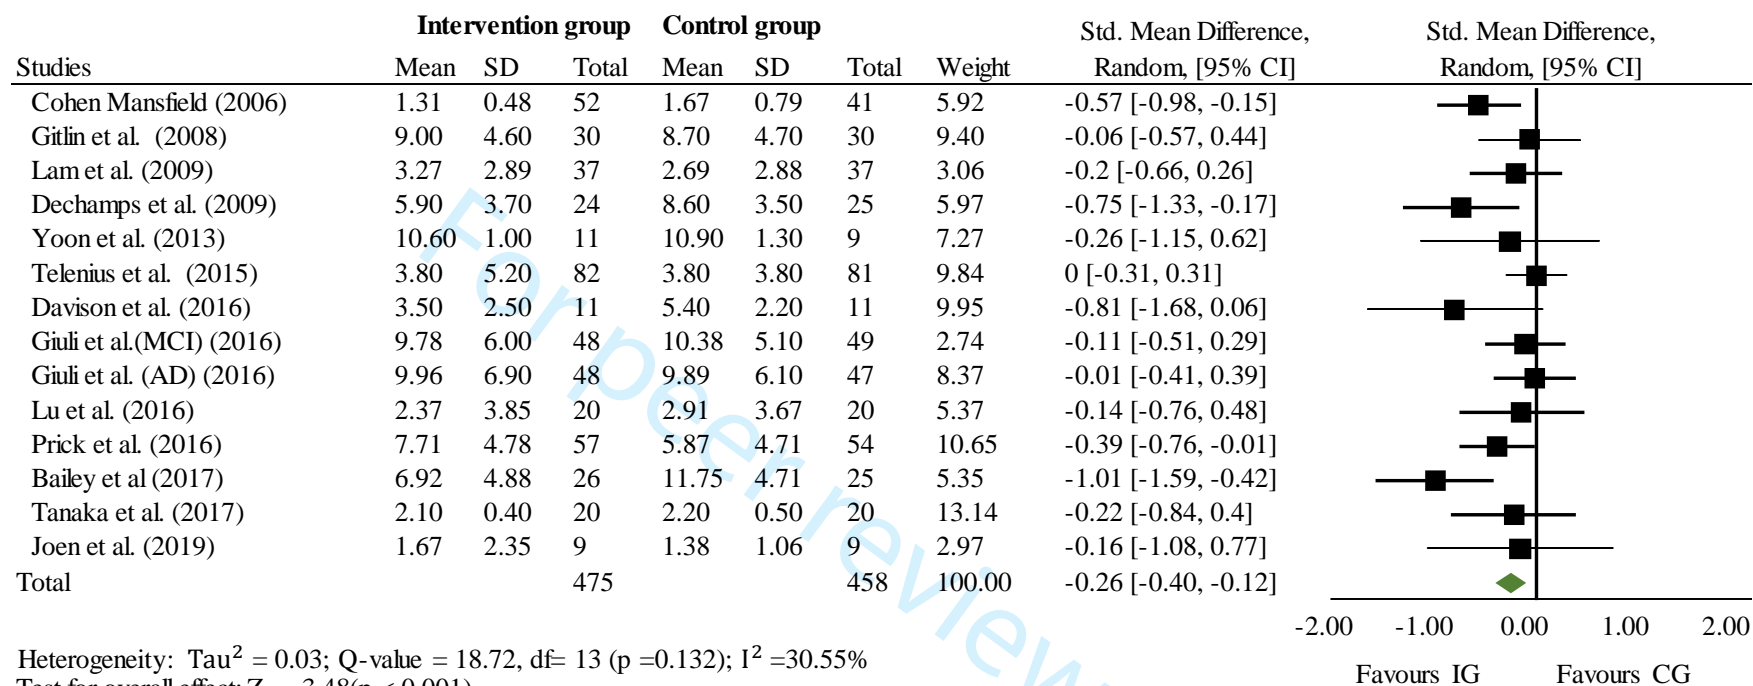

Supplementary Figure 5. Effects of tailored interventions on engagement at post-intervention (N =8)

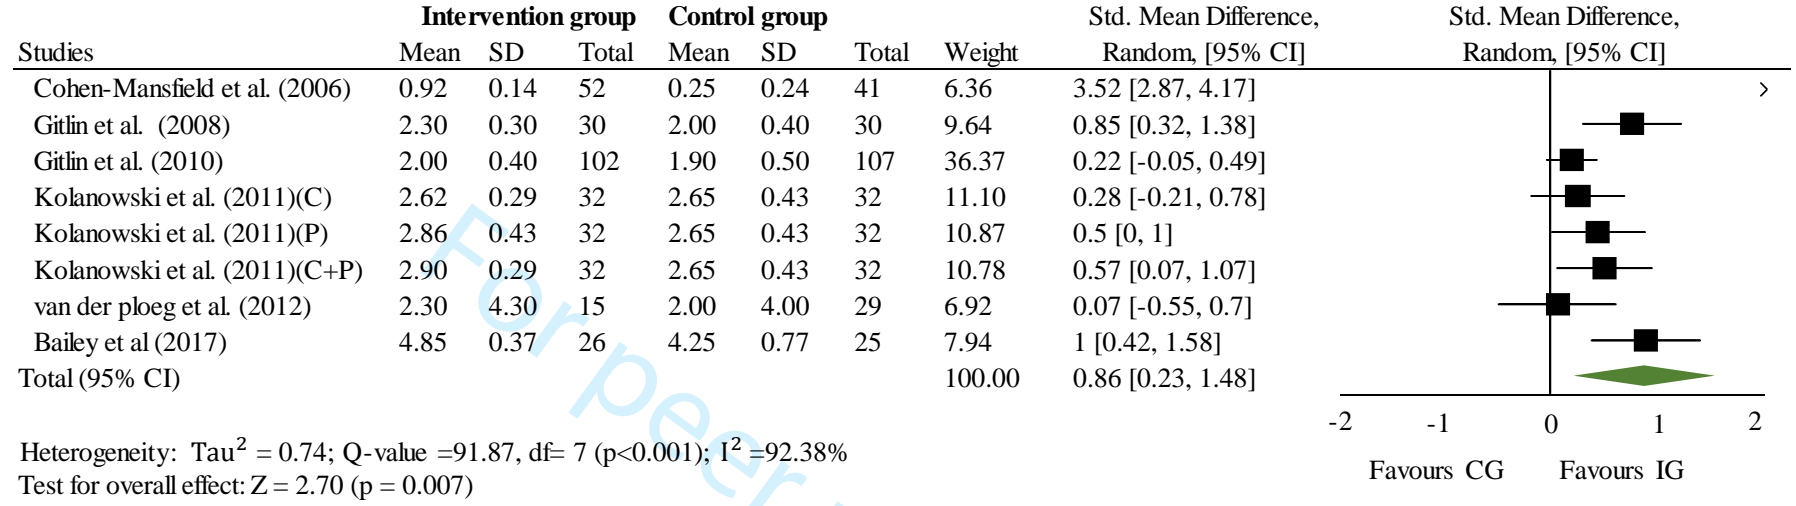

Supplementary Figure 6. Subgroup analysis: Effects of tailored interventions on depression at post-intervention by level of tailoring (N=14)

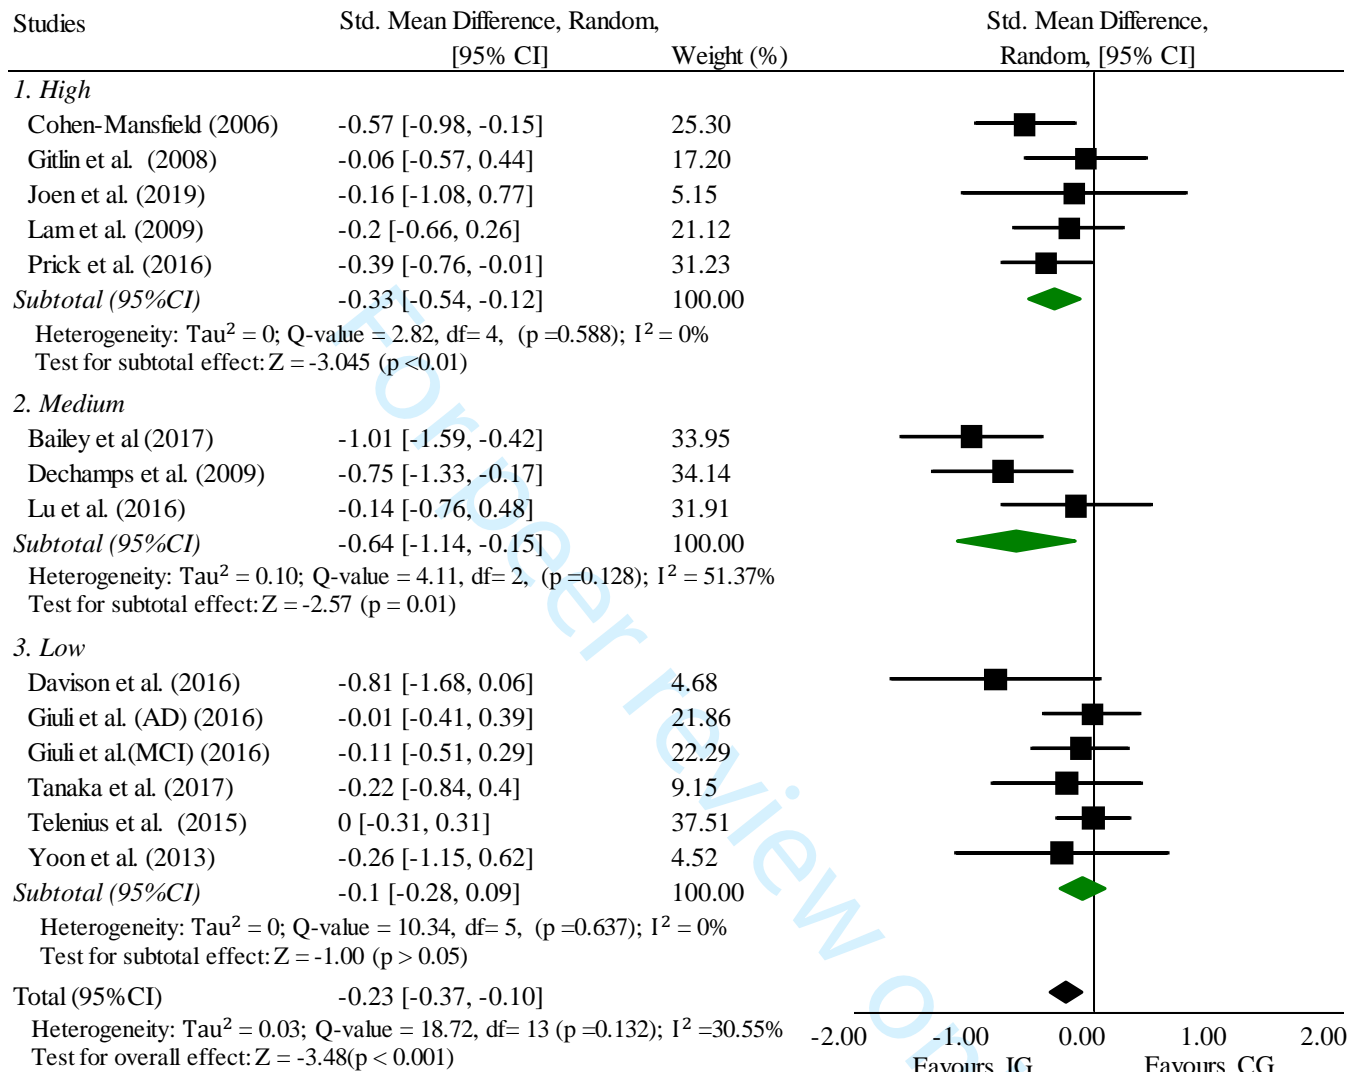



Supplementary Figure 7. Subgroup analysis: Effects of tailored interventions on engagement at post-intervention by level of tailoring (N=7)

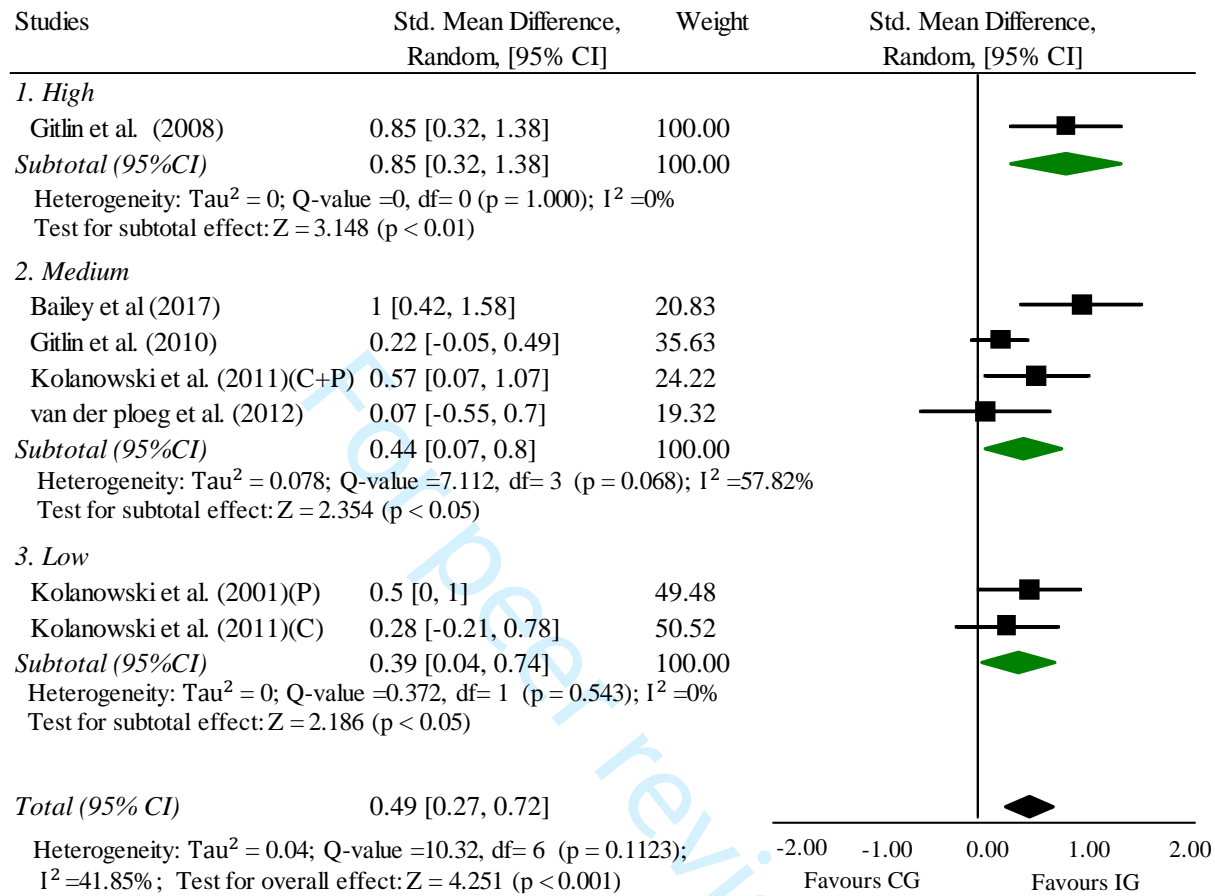

Note: One study was not included in this meta-analysis based on the findings from Supplementary Figure 5 in order to reduce heterogeneity.

## Preferred Reporting Items for Systematic Reviews and Meta-Analyses (PRISMA) statement

| Section/topic                      | #  | Checklist item                                                                                                                                                                                                                                                                                              | Reported on page                        |
|------------------------------------|----|-------------------------------------------------------------------------------------------------------------------------------------------------------------------------------------------------------------------------------------------------------------------------------------------------------------|-----------------------------------------|
| <b>TITLE</b>                       |    |                                                                                                                                                                                                                                                                                                             |                                         |
| Title                              | 1  | Identify the report as a systematic review, meta-analysis, or both.                                                                                                                                                                                                                                         | Page 1                                  |
| <b>ABSTRACT</b>                    |    |                                                                                                                                                                                                                                                                                                             |                                         |
| Structured summary                 | 2  | Provide a structured summary including, as applicable: background; objectives; data sources; study eligibility criteria, participants, and interventions; study appraisal and synthesis methods; results; limitations; conclusions and implications of key findings; systematic review registration number. | Page 2                                  |
| <b>INTRODUCTION</b>                |    |                                                                                                                                                                                                                                                                                                             |                                         |
| Rationale                          | 3  | Describe the rationale for the review in the context of what is already known.                                                                                                                                                                                                                              | Page 3-4                                |
| Objectives                         | 4  | Provide an explicit statement of questions being addressed with reference to participants, interventions, comparisons, outcomes, and study design (PICOS).                                                                                                                                                  | Page 5                                  |
| <b>METHODS</b>                     |    |                                                                                                                                                                                                                                                                                                             |                                         |
| Protocol and registration          | 5  | Indicate if a review protocol exists, if and where it can be accessed (e.g., Web address), and, if available, provide registration information including registration number.                                                                                                                               | Page 2,<br>PROSPERO:<br>CRD42020168556. |
| Eligibility criteria               | 6  | Specify study characteristics (e.g., PICOS, length of follow-up) and report characteristics (e.g., years considered, language, publication status) used as criteria for eligibility, giving rationale.                                                                                                      | Page 5-6                                |
| Information sources                | 7  | Describe all information sources (e.g., databases with dates of coverage, contact with study authors to identify additional studies) in the search and date last searched.                                                                                                                                  | Page 6                                  |
| Search                             | 8  | Present full electronic search strategy for at least one database, including any limits used, such that it could be repeated.                                                                                                                                                                               | Page 6 &<br>Supplementary<br>Table 1.   |
| Study selection                    | 9  | State the process for selecting studies (i.e., screening, eligibility, included in systematic review, and, if applicable, included in the meta-analysis).                                                                                                                                                   | Page 6                                  |
| Data collection process            | 10 | Describe method of data extraction from reports (e.g., piloted forms, independently, in duplicate) and any processes for obtaining and confirming data from investigators.                                                                                                                                  | Page 6                                  |
| Data items                         | 11 | List and define all variables for which data were sought (e.g., PICOS, funding sources) and any assumptions and simplifications made.                                                                                                                                                                       | Page 6-8                                |
| Risk of bias in individual studies | 12 | Describe methods used for assessing risk of bias of individual studies (including specification of whether this was done at the study or outcome level), and how this information is to be used in any data synthesis.                                                                                      | Page 8                                  |

| Section/topic                 | #  | Checklist item                                                                                                                                                                                           | Page #                                |
|-------------------------------|----|----------------------------------------------------------------------------------------------------------------------------------------------------------------------------------------------------------|---------------------------------------|
| Summary measures              | 13 | State the principal summary measures (e.g., risk ratio, difference in means).                                                                                                                            | Page 8                                |
| Synthesis of results          | 14 | Describe the methods of handling data and combining results of studies, if done, including measures of consistency (e.g., I <sup>2</sup> ) for each meta-analysis.                                       | Page 8                                |
| Risk of bias across studies   | 15 | Specify any assessment of risk of bias that may affect the cumulative evidence (e.g., publication bias, selective reporting within studies).                                                             | Page 8                                |
| Additional analyses           | 16 | Describe methods of additional analyses (e.g., sensitivity or subgroup analyses, meta-regression), if done, indicating which were pre-specified.                                                         | Page 8                                |
| <b>RESULTS</b>                |    |                                                                                                                                                                                                          |                                       |
| Study selection               | 17 | Give numbers of studies screened, assessed for eligibility, and included in the review, with reasons for exclusions at each stage, ideally with a flow diagram.                                          | Page 9 & Supplementary Figure 1       |
| Study characteristics         | 18 | For each study, present characteristics for which data were extracted (e.g., study size, PICOS, follow-up period) and provide the citations.                                                             | Page 9-10 & Supplementary table 3 & 4 |
| Risk of bias within studies   | 19 | Present data on risk of bias of each study and, if available, any outcome level assessment (see item 12).                                                                                                | Page 11 & Supplementary Figure 2 & 3  |
| Results of individual studies | 20 | For all outcomes considered (benefits or harms), present, for each study: (a) simple summary data for each intervention group (b) effect estimates and confidence intervals, ideally with a forest plot. | Page 11-13<br>Supplementary table 4   |
| Synthesis of results          | 21 | Present results of each meta-analysis done, including confidence intervals and measures of consistency.                                                                                                  | Page 11-13                            |
| Risk of bias across studies   | 22 | Present results of any assessment of risk of bias across studies (see Item 15).                                                                                                                          | Page 11                               |
| Additional analysis           | 23 | Give results of additional analyses, if done (e.g., sensitivity or subgroup analyses, meta-regression [see Item 16]).                                                                                    | Page 13-14                            |
| <b>DISCUSSION</b>             |    |                                                                                                                                                                                                          |                                       |
| Summary of evidence           | 24 | Summarize the main findings including the strength of evidence for each main outcome; consider their relevance to key groups (e.g., healthcare providers, users, and policy makers).                     | Page 14-15                            |
| Limitations                   | 25 | Discuss limitations at study and outcome level (e.g., risk of bias), and at review-level (e.g., incomplete retrieval of identified research, reporting bias).                                            | Page 15                               |
| Conclusions                   | 26 | Provide a general interpretation of the results in the context of other evidence, and implications for future research.                                                                                  | Page 15                               |
| <b>FUNDING</b>                |    |                                                                                                                                                                                                          |                                       |
| Funding                       | 27 | Describe sources of funding for the systematic review and other support (e.g., supply of data); role of funders for the systematic review.                                                               | Page 17                               |

From: Moher D, Liberati A, Tetzlaff J, Altman DG, The PRISMA Group (2009). Preferred Reporting Items for Systematic Reviews and Meta-Analyses: The PRISMA Statement. PLoS Med 6(7): e1000097. doi:10.1371/journal.pmed1000097

# BMJ Open

## Degree of personalisation in tailored activities and its effect on behavioural and psychological symptoms and quality of life among people with dementia: A systematic review and meta-analysis

|                                 |                                                                                                                                                                                                                                                                                                                                                                                                                                                                                                                                                                                                                                                                                                            |
|---------------------------------|------------------------------------------------------------------------------------------------------------------------------------------------------------------------------------------------------------------------------------------------------------------------------------------------------------------------------------------------------------------------------------------------------------------------------------------------------------------------------------------------------------------------------------------------------------------------------------------------------------------------------------------------------------------------------------------------------------|
| Journal:                        | <i>BMJ Open</i>                                                                                                                                                                                                                                                                                                                                                                                                                                                                                                                                                                                                                                                                                            |
| Manuscript ID                   | bmjopen-2021-048917.R1                                                                                                                                                                                                                                                                                                                                                                                                                                                                                                                                                                                                                                                                                     |
| Article Type:                   | Original research                                                                                                                                                                                                                                                                                                                                                                                                                                                                                                                                                                                                                                                                                          |
| Date Submitted by the Author:   | 13-Sep-2021                                                                                                                                                                                                                                                                                                                                                                                                                                                                                                                                                                                                                                                                                                |
| Complete List of Authors:       | Lu, Shiyu ; City University of Hong Kong, Department of Social and Behavioural Sciences<br>Zhang, Anna Y.; University of Hong Kong, Department of Social Work and Social Administration<br>Liu, Tianyin; University of Hong Kong, Department of Social Work and Social Administration<br>Choy, Jacky CP ; University of Hong Kong, Department of Social Work and Social Administration<br>Ma, Maggie S.L.; University of Hong Kong, Department of Social Work and Social Administration<br>Wong, Gloria; University of Hong Kong, Department of Social Work and Social Administration; Sau Po Centre on Ageing<br>Lum, Terry; University of Hong Kong, Department of Social Work and Social Administration |
| <b>Primary Subject Heading</b>: | Global health                                                                                                                                                                                                                                                                                                                                                                                                                                                                                                                                                                                                                                                                                              |
| Secondary Subject Heading:      | Public health, Mental health                                                                                                                                                                                                                                                                                                                                                                                                                                                                                                                                                                                                                                                                               |
| Keywords:                       | Dementia < NEUROLOGY, MENTAL HEALTH, Old age psychiatry < PSYCHIATRY                                                                                                                                                                                                                                                                                                                                                                                                                                                                                                                                                                                                                                       |
|                                 |                                                                                                                                                                                                                                                                                                                                                                                                                                                                                                                                                                                                                                                                                                            |

SCHOLARONE™  
Manuscripts



I, the Submitting Author has the right to grant and does grant on behalf of all authors of the Work (as defined in the below author licence), an exclusive licence and/or a non-exclusive licence for contributions from authors who are: i) UK Crown employees; ii) where BMJ has agreed a CC-BY licence shall apply, and/or iii) in accordance with the terms applicable for US Federal Government officers or employees acting as part of their official duties; on a worldwide, perpetual, irrevocable, royalty-free basis to BMJ Publishing Group Ltd ("BMJ") its licensees and where the relevant Journal is co-owned by BMJ to the co-owners of the Journal, to publish the Work in this journal and any other BMJ products and to exploit all rights, as set out in our [licence](#).

The Submitting Author accepts and understands that any supply made under these terms is made by BMJ to the Submitting Author unless you are acting as an employee on behalf of your employer or a postgraduate student of an affiliated institution which is paying any applicable article publishing charge ("APC") for Open Access articles. Where the Submitting Author wishes to make the Work available on an Open Access basis (and intends to pay the relevant APC), the terms of reuse of such Open Access shall be governed by a Creative Commons licence – details of these licences and which [Creative Commons](#) licence will apply to this Work are set out in our licence referred to above.

Other than as permitted in any relevant BMJ Author's Self Archiving Policies, I confirm this Work has not been accepted for publication elsewhere, is not being considered for publication elsewhere and does not duplicate material already published. I confirm all authors consent to publication of this Work and authorise the granting of this licence.

1  
2  
3 **Title:** Degree of personalisation in tailored activities and its effect on behavioural and  
4  
5 psychological symptoms and quality of life among people with dementia: A systematic  
6  
7 review and meta-analysis  
8  
9

10  
11  
12  
13  
14 **Authors & Affiliations:** Shiyu Lu,<sup>1,3</sup> Anna Y. Zhang,<sup>2</sup> Tianyin Liu,<sup>2</sup> Jacky C. P. Choy,<sup>2</sup>  
15  
16 Maggie S. L. Ma,<sup>2</sup> Gloria H. Y. Wong,<sup>1,2</sup> & Terry Y. S. Lum<sup>1,2</sup>  
17  
18

19  
20 <sup>1</sup> Sau Po Centre on Ageing, The University of Hong Kong.  
21

22 <sup>2</sup> Department of Social Work and Social Administration, The University of Hong Kong.  
23

24 <sup>3</sup> Department of Social and Behavioural Sciences, City University of Hong Kong.  
25  
26  
27  
28

29 **Correspondence to:** Terry Y. S. Lum, Department of Social Work and Social  
30 Administration, The University of Hong Kong, Pok Fu Lam, Hong Kong (Email:  
31 [tlum@hku.hk](mailto:tlum@hku.hk))  
32  
33

34  
35 **Word count:** 4,717  
36

37 **Tables & Figures:** 1 Table & 4 Figures  
38

39 **Supplementary Materials:** 6 Supplementary Tables; 8 Supplementary Figures; 1 Appendix  
40

41 **Research Checklist:** 1 PRISMA checklist  
42  
43  
44  
45  
46  
47  
48  
49  
50  
51  
52  
53  
54  
55  
56  
57  
58  
59  
60

## ABSTRACT

**Objectives** To understand and assess the degree of personalisation of tailored activities for people with dementia (PWD); and to estimate the magnitude of the effects of levels of personalisation on reducing behavioural and psychological symptoms of dementia (BPSD), improving Quality of life (QoL).

**Design** Systematic review with meta-analysis.

**Data Sources** ProQuest, PubMed, Ovid, Cochrane Library, Web of Science and CINAHL were searched from the start of indexing to May 2020.

**Eligibility Criteria** We included randomised controlled trials and quasi-experimental studies assessing the effects of tailored activities for people aged 60 years or older with dementia or cognitive impairment on the outcomes of BPSD, QoL, depression, and level of engagement with control groups.

**Data extraction and synthesis** Two researchers screened studies, extracted data and assessed risks of bias. A rating scheme to assess the degree of personalisation of tailored activities was developed to classify tailored activities into high/medium/low groups. Effect sizes were expressed using standardised mean differences at 95% confidence intervals. Subgroup analyses were conducted to assess whether the degree of personalisation of tailored activities affects outcomes of interest.

**Results** Thirty-five studies covering 2,390 participants from 16 countries/regions were identified. Studies with a high-level of personalisation interventions (n=8) had a significant and moderate effect on reducing BPSD (Standardized Mean Differences, SMD= -0.52, p <0.05), followed by medium (n=6; SMD= -0.38, p=0.071) and low-level personalisation interventions (n=4; SMD= -0.15, p=0.076). Tailored activities with a high-level of personalisation had a moderate effect size on improving QoL (n=5; SMD=0.52, p<0.05), followed by a medium level (n=3; SMD=0.41, p <0.05) of personalisation.

**Conclusions** To develop high-level tailored activities to reduce BPSD and improve QoL among PWD, we recommend applying comprehensive assessments to identify and address two or more PWD characteristics in designed tailored activities and allow modification of interventions to respond to changing PWD needs/circumstances.

### Strengths and limitations of this study

- The major contribution of this systematic review and meta-analyses is developing a rating scheme to assess the level of personalisation for interventions.
- To assess whether the degree of personalisation of the tailored activities affects reduction of behavioural and psychological symptoms of dementia and improves quality of life among people with dementia or cognitive impairment.
- Exclusion of papers not published in English may mean that important additional findings are missed.

1  
2  
3 **Degree of personalisation in tailored activities and its effect on behavioural and**  
4 **psychological symptoms and quality of life among people with dementia: A systematic**  
5 **review and meta-analysis**  
6  
7  
8  
9  
10  
11

12 **INTRODUCTION**  
13

14 Dementia is particularly common among older adults, affecting 5-8% of people aged 60 and  
15 over at any given time worldwide.<sup>1</sup> Behavioural and psychological symptoms of dementia  
16 (BPSD) are common among people living with dementia (PWD), such as agitation, depression,  
17 and resistance to care,<sup>2</sup> which occur throughout the disease process, associated with decreased  
18 quality of life (QoL).<sup>3</sup>  
19  
20  
21  
22  
23  
24  
25

26 Non-pharmacological interventions are recommended as first-line treatments over  
27 pharmacological approaches to treat BPSD and have less adverse effects.<sup>4</sup> Tailored activities  
28 for PWD are promising non-pharmacological approaches that reduce BPSD and increase QoL.  
29 Two recently-published National Institute for Health and Care Excellence (NICE) guidelines  
30 recommend that healthcare professionals offer activities to promote QoL that are tailored to  
31 personal preferences and consider using a structured tool to assess their likes, dislikes, routines  
32 and personal history.<sup>5,6</sup>  
33  
34  
35  
36  
37  
38  
39  
40  
41

42 To our knowledge, six systematic reviews and meta-analyses (summarised in  
43 Supplementary Table 1) have synthesised the effects of tailored activities on reducing BPSD  
44 and enhancing QoL among PWD, based on tailored strategies, activity types, personal  
45 characteristics, and frequency and duration of delivery.<sup>7-12</sup> The first of these, incorporating  
46 studies published between 2000 and 2011, focused on the effectiveness of various tailored  
47 strategies to foster activity engagement and reduce BPSD in PWD.<sup>7</sup> Changes to tools and  
48 materials used in activities were most common but yielded mixed outcomes of BPSD reduction;  
49 modifications to space and social demands were rarely tested but yielded consistently positive  
50  
51  
52  
53  
54  
55  
56  
57  
58  
59  
60



1  
2  
3 outcomes.<sup>7</sup> In addition, a systematic review of studies published between 2000 and 2012 found  
4 that personalised pleasant activities yielded strong evidence for treating BPSD but limited  
5 evidence for physical and music activities.<sup>8</sup> Another meta-analysis found that individualised  
6 recreational activities were effective for reducing BPSD.<sup>9</sup> Recently, Mohler and colleagues  
7 conducted three meta-analyses regarding the effects of tailored activities among PWD living  
8 in care facilities, communities and home settings, respectively, and found that, compared with  
9 usual care, tailored activities slightly reduced BPSD.<sup>10-12</sup> However, no differences in other  
10 desired outcomes between intervention and control groups among different specific types of  
11 activity or duration of delivery were evident. Although different activity components (e.g.,  
12 activity types, PWD characteristics, frequency, and duration of delivery) were discussed,<sup>7-12</sup> no  
13 review further investigated the degree of tailoring among the tailored activities and synthesised  
14 its associations with the desired outcomes.

15  
16  
17  
18  
19  
20  
21  
22  
23  
24  
25  
26  
27  
28  
29  
30  
31 Understanding the degree of personalisation of tailored activities is important. We define  
32 the degree of personalisation of tailored activities as the extent to which non-pharmacological  
33 interventions are tailored, individualised or personalised for PWD. The conceptualisation of  
34 the degree of personalisation echoes the rationales and principles of effective interventions  
35 working on BPSD, level of engagement and QoL, embedded in occupational therapy,<sup>13</sup>  
36 engagement in meaningful activities,<sup>14</sup> and person-centred care.<sup>15</sup> Occupational therapy  
37 emphasises the fit between PWD capabilities and the occupation (e.g., activities or roles)  
38 through task simplification and removing barriers in the physical and social environment.<sup>13</sup>  
39 Environmental docility theory suggests that both underloading and overloading of external  
40 stimulations (e.g., cognitive activities and social interactions) may lead to PWD disengagement  
41 or excessive disability.<sup>16</sup> Thus, maintaining PWD engagement in meaningful activities through  
42 tailored activities based on their physical strength, mental state, and psychosocial needs is  
43 essential.<sup>14</sup> The person-centred care approach stresses service providers' and caregivers'

1  
2  
3 autonomy to determine specific ways of delivering care to maintain participants' engagement  
4 during the intervention.<sup>15</sup> These theories imply that the degree of personalisation can  
5 significantly influence the effectiveness of tailored activities for PWD. Thus, the degree of  
6 personalisation could depend on the assessment of PWD characteristics and their environment,  
7 the design of tailored activities based on PWD characteristics, and interventionists' autonomy  
8 to address PWD spontaneous needs.  
9

10  
11  
12  
13  
14  
15  
16  
17  
18  
19  
20  
21  
22  
23  
24  
25  
26  
27  
28  
29  
30  
31  
32  
33  
34  
35  
36  
37  
38  
39  
40  
41  
42  
43  
44  
45  
46  
47  
48  
49  
50  
51  
52  
53  
54  
55  
56  
57  
58  
59  
60

Conceptualising and quantifying the levels of personalisation of existing tailored activities can advance our knowledge on developing a high level of personalisation of tailored activities for PWD, deciding on the appropriate “dose” of tailoring, and translating this cumulative evidence into clinical practice. However, existing literature provides little knowledge about assessing the degree of personalisation among tailored activities and their effectiveness on targeted outcomes.

## **OBJECTIVES**

This systematic review and meta-analysis aimed to: (1) assess the degree of personalisation of existing tailored activities for PWD; (2) estimate the magnitude of the effects of existing tailored activities on reducing BPSD, improving QoL and the level of engagement among PWD; and (3) assess whether the degree of personalisation of tailored activities affects the outcomes of interest.

## **METHODS AND ANALYSIS**

We conducted the review in accordance with the Preferred Reporting Items for Systematic Reviews and Meta-Analyses (PRISMA) procedure.<sup>17</sup> Eligibility criteria required studies to: (a) include participants with dementia or cognitive impairment and aged 60 years or older; (b) include activities tailored to at least one of the participants' characteristics (e.g., needs, physical or/and mental ability, present or previous preferences for particular activities or interests, habits, and physical living environment like housing conditions and caregiver management style); (c)

1  
2  
3 report BPSD (measured by multi-domain scales, such as the Neuropsychiatric Inventory, and  
4 scales specific to agitation and depression/anxiety, such as the Cohen-Mansfield Agitation  
5 Inventory and the Cornell Scale for Depression in Dementia),<sup>18-20</sup> QoL and level of engagement  
6 as outcomes; (d) include randomised controlled trials or quasi-experimental study design; and  
7  
8 (e) apply a control group (e.g., usual care, wait-list, attention control etc.). The review included  
9 studies published in English from the start of indexing to May 2020.

10  
11  
12 We searched ProQuest (e.g., APA PsycInfo), PubMed, Ovid (e.g., Embase), Cochrane  
13 Library, Web of Science and CINAHL, using the search terms: (1) “cognitive impairment” OR  
14 “cognitive disorder” OR “dement\*” OR “Alzheimer”; (2) “tailor\*” OR “engag\*” OR  
15 “individual\*” OR “personal\*”; and (3) “activit\*” OR “program\*” OR “therap\*” OR  
16 “intervention\*” OR “treatment\*”. The full search strategy is shown in Supplementary Table 2.

17  
18  
19  
20  
21  
22  
23  
24  
25  
26  
27  
28  
29  
30  
31  
32  
33  
34  
35  
36  
37  
38  
39  
40  
41  
42  
43  
44  
45  
46  
47  
48  
49  
50  
51  
52  
53  
54  
55  
56  
57  
58  
59  
60  
SYL and AYZ independently completed the title/abstract review and full-text review. We  
conducted title/abstract screening using Rayyan (<https://www.rayyan.ai/>) and full-text review  
using Endnote. The two researchers discussed disagreements in the title/abstract screening and  
full-text review to reach consensus. Data were extracted and checked by SYL and MSLM.  
Where there were disagreements, data were rechecked for relevance and accuracy. Where  
available, raw data (e.g., clinical interventions, strategies, outcomes and results) were extracted  
and entered into a spreadsheet.<sup>21</sup> For each intervention, we additionally extracted the following  
information: PWD characteristics taken into account, intervention delivery, and information  
about the tailoring process (The data extraction form is shown in Appendix 1).

**PROSPERO registration number:** CRD42020168556.

### **Ethics approval statement**

This study does not involve human participants.

### **Patient and public involvement**

No patient involved.

### *Developing the tailoring and classification scheme*

The authors formed an expert panel to develop a scheme for the level of personalisation interventions based on the included studies, comprising AYZ (a licensed social worker in Hong Kong with two years clinical experience of dementia care and five years research experience focusing on the mechanisms of non-pharmacological interventions for PWD), TYL, JCPC and SYL (each of whom had over ten-year experience in psychology and elderly care).

Based on the theories and approaches mentioned above, we hypothesised that tailoring is embedded in the whole process at three interrelated phases: assessment, design and implementation, and the degree of personalisation is determined by these three dimensions: (a) how to assess PWD characteristics before designing the intervention; (b) the extent to which interventions are tailored according to PWD characteristics; and (c) the level of the interventionists' autonomy to address PWD needs, as suggested by occupational therapy, engagement in meaningful activities, and the person-centred care approach (Supplementary Figure 1).<sup>13-15</sup> To this end, we developed three corresponding criteria to rate levels of personalisation (Supplementary Table 3):

First, the level of assessment for tailoring refers to how comprehensive the PWD characteristics were considered and how systematically the assessment results were utilised for designing tailored activities. Operationally, we rated the level of assessment as “unclear/incomprehensive”, “semi-structured”, or “structured”. “Unclear/incomprehensive” indicated that pre-assessment was missing/not clearly described, only a single domain of PWD characteristics was assessed, or no description of how the assessment results were utilised to inform the tailored activities design. “Semi-structured” referred to pre-assessments conducted by unstructured/semi-structured interviews, with some descriptions on how the assessment results were utilised for activities design, “Structured” pre-assessments employed structured

1  
2  
3 interviews with clear and detailed descriptions on how the assessment results were  
4  
5 systematically utilised for the activities design.  
6  
7

8 Second, individualisation in intervention design refers to how the intervention design  
9  
10 accounted for individuals' uniqueness and variations of their needs. To avoid counting the  
11  
12 number or arbitrarily weighting specific PWD characteristics, we distinguished the degree of  
13  
14 individualisation based on whether the protocol tailored for one versus two or more PWD  
15  
16 characteristics.  
17  
18

19 Third, the degree of person-centred care in implementation refers to how the  
20  
21 interventionists were able to adjust the intervention based on their clinical knowledge and  
22  
23 observation of participants' performance in the intervention to maintain participants'  
24  
25 engagement and respond to participants' spontaneous needs during the implementation.  
26  
27 Intervention with a standardised protocol of tailored activities regardless of spontaneous needs  
28  
29 of PWD were rated as low flexibility for pursuing person-centred care, and interventions  
30  
31 encouraging and allowing great flexibility for interventionists to adjust the tailored activities  
32  
33 based on clinical knowledge and observation of participants' performance were rated as high  
34  
35 flexibility.  
36  
37  
38  
39

40 Based on the dimensions mentioned above, we rated the level of personalisation of tailored  
41  
42 activities as high, medium, or low. A study was rated as high level only if it met all the  
43  
44 following criteria: (a) structured assessments were utilised for systematically tailored activities  
45  
46 plan; (b) interventions targeted two or more domains (e.g., capabilities, preferences, interests,  
47  
48 life experience, and external environment); and (c) allowed the interventionists to exercise  
49  
50 flexibility to adjust the intervention in accordance with PWD spontaneous needs. A study was  
51  
52 rated as medium if: (a) unstructured/semi-structured assessments on participants'  
53  
54 characteristics were performed; (b) interventions targeted two or more domains; and (c) some  
55  
56 flexibility and modifications were allowed for adjusting the intervention in response to PWD  
57  
58  
59  
60

1  
2  
3 needs. A study was rated as low if: (a) assessment was unclear/incomprehensive, or there was  
4 no clear description on how assessment results informed tailoring; (b) interventions targeted  
5 only one domain of participants' characteristics; and (c) low/marginal flexibility to pursue  
6 person-centred care for interventionists was allowed. AYZ and SYL independently rated the  
7 level of personalisation for the included tailored activities. The inter-rater reliability was 88.8%  
8 in the initial stage of rating. Conflicting ratings were resolved through discussion.  
9  
10  
11  
12  
13  
14  
15  
16  
17  
18

### 19 ***Data synthesis and analysis***

20  
21 Given that outcomes in our review were continuous, effect sizes were expressed using  
22 standardised mean differences (SMD) at 95% confidence intervals (CI),<sup>20</sup> interpreted as  
23 Cohen's d.<sup>22</sup> Specifically, the values of 0.2, 0.5, and 0.8 reflected small, moderate and large  
24 effect sizes, respectively.<sup>22</sup> Due to differences in settings and methods, we used the random-  
25 effects model to pool the results. Heterogeneity was determined by Chi<sup>2</sup> and I<sup>2</sup> statistics.<sup>23, 24</sup>  
26 We classified subgroup analyses of the effectiveness of tailored activities according to the  
27 levels of tailoring of the interventions. All meta-analyses were conducted using Comprehensive  
28 Meta-Analysis Software. Where raw data are not provided, summary results are given in the  
29 text but not the forest plots. The meta-analyses included results from randomised controlled  
30 studies (RCTs) only because the findings from quasi-experimental studies were not comparable  
31 to those from RCTs. Sensitivity analyses were conducted to check the robustness of the  
32 findings.  
33  
34  
35  
36  
37  
38  
39  
40  
41  
42  
43  
44  
45  
46  
47  
48

### 49 ***Quality Appraisal***

50  
51 SYL and MSLM independently assessed the risk of bias for the studies using a revised  
52 Cochrane risk of bias tool for randomised trials,<sup>23, 25</sup> including: (a) bias arising from the  
53 randomisation process; (b) deviations from intended interventions; (c) bias due to missing  
54 outcome data; (d) bias in measurement of the outcome; and (e) bias in selection of the reported  
55  
56  
57  
58  
59  
60

1  
2  
3 results. Risk of Bias in Non-randomised Studies of Interventions (ROBINS) was used to  
4  
5  
6  
7  
8  
9  
10  
11  
12  
13  
14  
15  
16  
17  
18  
19  
20  
21  
22  
23  
24  
25  
26  
27  
28  
29  
30  
31  
32  
33  
34  
35  
36  
37  
38  
39  
40  
41  
42  
43  
44  
45  
46  
47  
48  
49  
50  
51  
52  
53  
54  
55  
56  
57  
58  
59  
60

results. Risk of Bias in Non-randomised Studies of Interventions (ROBINS) was used to  
categorise the risk of bias as “low,” “high”, or “some concerns” for non-RCT studies.<sup>22</sup>  
Conflicting results were resolved through discussions.

## RESULTS

### *Summary of Search Results*

The search and study selection process are summarised in the PRISMA flow diagram (Supplementary Figure 2). In the identification phase, 14,238 abstracts were identified and imported into Endnote; 7,471 duplicate articles were removed. In the screening phase, the titles and abstracts of 6,767 articles were screened, and 6,476 irrelevant articles were excluded. In the eligibility phase, full-text screening was conducted for 291 articles according to the inclusion and exclusion criteria, and 35 studies were finally included in this review.

Included studies were conducted in 16 countries/regions: Australia, Brazil, Mainland China, Denmark, France, Germany, Hong Kong, Italy, Japan, Korea, the Netherlands, Norway, Switzerland, Taiwan, the United Kingdom, and the United States, published between 2000 and 2020. The average age of participants ranged from 62.1 to 89.2 years. Twenty-nine studies included participants with dementia only, and the remaining studies included participants with mild to moderate levels of cognitive impairment. The total size of the intervention groups (IG) was 1,248 (range = 6-158), and the total size of the control groups (CG) was 1,142 (range = 5-107). Fourteen studies (40%) had no more than 20 participants for each arm. Thirty studies were RCTs. Five applied a quasi-experimental study design. Twenty-two applied usual care as the comparison, and the remaining applied placebo control, active control or wait-list control. Twenty-four studies were conducted in care facilities (such as a nursing home, geriatric health service facility, or hospital), and the remaining studies were conducted in community settings or home-based settings (Supplementary Table 4).

### *Description of the interventions*

1  
2  
3 The components of activities can be categorized into four groups: physical (n=3),<sup>26-28</sup> cognitive  
4 (n=2),<sup>29,30</sup> music (n=7)<sup>31-37</sup> and multiple activities (n=23).<sup>16,38-59</sup> Twenty-three studies reported  
5 their interventions as individual mode, five reported group-based mode, and six reported mixed  
6 modes, while the remaining studies did not provide details. Intervention was provided by  
7 specialists (e.g., occupational therapists, clinicians, psychologists, physical therapists, and  
8 speech therapists), researchers and trained nursing home caregivers and staff. A detailed  
9 description of interventions is shown in Supplementary Table 5.  
10  
11  
12  
13  
14  
15  
16  
17  
18

### 19 ***Level of personalisation***

20  
21 Based on the three-dimension rating scheme for the personalisation of tailored activities, we  
22 identified 12 studies as high level,<sup>16, 26, 35, 39, 40, 46, 49, 51, 53-56</sup> 11 as medium,<sup>34, 36, 38, 42, 44, 45, 47, 52,</sup>  
23  
24  
25  
26  
27  
28  
29  
30  
31  
32  
33  
34  
35  
36  
37  
38  
39  
40  
41  
42  
43  
44  
45  
46  
47  
48  
49  
50  
51  
52  
53  
54  
55  
56  
57  
58  
59  
60  
One was rated as mixed because it had 3-arm intervention groups with one medium and two low levels of tailoring activities for comparison.<sup>41</sup> Table 1 shows the level of personalisation among the interventions reported in the reviewed studies.

*Level of assessment for tailoring.* Sixteen studies assessed the full picture of PWD characteristics using structural assessments.<sup>16, 26, 35, 38-42, 46, 49, 51, 53-56, 59</sup> For instance, five studies followed the protocol of the Tailored Activity Program (TAP) incorporating the Progressive Lowered Stress Threshold Model.<sup>60</sup> This posits that with disease progression, dementia patients become increasingly vulnerable to their environment and experience lower thresholds for tolerating stimuli that can result in behavioural disturbances. TAP applied systematic approaches to discern PWD and their caregivers' daily routines, identify previous and current activity interests and collect information about dyadic communication and home environmental features to design activities for participants.

*Degree of individualisation in design.* Activities tailored according to PWD characteristics included cognitive or/and physical capacities (n = 22),<sup>26-28, 30, 38, 39, 41-47, 49, 51, 53-59</sup> personal experience and history (n=2),<sup>34, 48</sup> role identity (n=3),<sup>39, 51, 55</sup> preferences and interests (n=20)



1  
2  
3 26, 29, 31-33, 35-37, 40-42, 46, 47, 50, 53-57, 59 habits (n=2),<sup>51, 54</sup> cultural backgrounds (n=1),<sup>47</sup> and living  
4 environment (n=5).<sup>49, 51, 53, 54, 56</sup> Five studies also considered caregivers' characteristics.<sup>46, 51, 53,</sup>  
5  
6  
7  
8  
9  
10  
11  
12  
13  
14  
15  
16  
17  
18  
19  
20  
21  
22  
23  
24  
25  
26  
27  
28  
29  
30  
31  
32  
33  
34  
35  
36  
37  
38  
39  
40  
41  
42  
43  
44  
45  
46  
47  
48  
49  
50  
51  
52  
53  
54  
55  
56  
57  
58  
59  
60

54, 56 Twelve studies tailored the intervention for a single aspect of PWD characteristics only, while the remainder tailored the activities for at least two. One study used a 4-arm study design (3 intervention groups plus one control group), with one tailoring both for PWD capacity and interests, the second only tailoring for the capacities yet opposite to PWD preference, and the third only tailoring for the interests yet challenging to PWD' capacity in the three intervention groups.<sup>41</sup>

*Degree of person-centred care in delivery.* Twenty-six studies indicated the level of flexibility for modification of activities during the intervention. Sixteen studies explicitly permitted the interventionists to review and modify the intervention according to participants' spontaneous needs and circumstances,<sup>16, 26, 35, 36, 39-42, 46, 49, 51-56</sup> thus were rated as offering a high degree of person-centred care. Five allowed some flexibility for adjusting interventions during implementation,<sup>34, 47, 57-59</sup> thus were rated as offering some flexibility. Five studies enabled relatively limited adjustment of intervention to take account of changed PWD needs or circumstances.<sup>27, 32, 34, 37, 50</sup> The remaining studies provided insufficient information to judge the extent of flexibility allowed during the intervention.

<Insert Table 1>

### ***Quality appraisal***

The risk bias of ten RCT studies was judged as low, while that of 12 was rated as high, and the remainder were judged as giving some concern (Supplementary Figure 3). Nineteen RCT studies reported the method of random sequence generation (e.g., computer-generated programmes, random list generator, random allocation by an external researchers and block randomisation).<sup>16, 28-30, 33, 34, 37, 41-43, 46, 49, 51, 53-56, 58, 59</sup> Eleven were rated as high risk of deviation from intended intervention as they were judged as high risk of blinding participants, personnel

1  
2  
3 and appropriate analysis used to estimate the effect of assignment to intervention.<sup>27-30, 33, 36, 40,</sup>  
4  
5 42, 43, 48, 52 Five quasi-experimental studies were excluded from the meta-analysis since none  
6  
7 were rated at low risk of bias and thus comparable to RCTs (Supplementary Figure 4).  
8  
9

### 10 ***Meta-analysis: The effects of tailored interventions***

11  
12 Twenty-six studies reported the outcomes of BPSD measured by multi-dimension or specific  
13 scales of agitation (Figure 1).<sup>16, 27-29, 31, 33-37, 39-42, 44, 46, 47, 50, 51, 53-59</sup> The measurements used for  
14  
15 BPSD included the Neuropsychiatric Inventory (NPI), the Agitation Behavior Mapping  
16  
17 Instrument (AMI), the Cohen-Mansfield Agitation Inventory (CMAI), the Agitated Behaviors  
18  
19 in Dementia Scale, the Behavioral Pathology in Alzheimer's Disease (BEHAVE-AD) Rating  
20  
21 Scale, and the short version of the Dementia Behavior Disturbance Scale.<sup>18, 20, 61-64</sup> A higher  
22  
23 score indicates more BPSD. According to our meta-analysis, 18 RCTs with 20 tailored  
24  
25 activities had an overall small effect on BPSD at post-intervention (SMD<sub>pooled</sub> = -0.38; 95%  
26  
27 CI: -0.54 to -0.23, p < 0.001), although significant heterogeneity was found (I<sup>2</sup> = 64.17%, p<  
28  
29 0.001). Eight studies were excluded from the meta-analysis either because of their quasi-  
30  
31 experimental design or for not reporting the raw data,<sup>31, 36, 37, 44, 47, 50, 55, 57</sup>. Four of these  
32  
33 identified no differences in reducing BPSD between IG and CG.<sup>31, 36, 37, 50</sup>  
34  
35  
36  
37  
38  
39

40 <Insert Figure 1>

41  
42 Nine studies reported the outcome of QoL (Figure 2).<sup>16, 34, 48, 49, 51, 52, 54, 56, 58</sup> The  
43  
44 measurements used for QoL included Quality of Life-Alzheimer's Disease, the 3-Level version  
45  
46 of the EuroQol five dimensions (EQ5D-3L), the EuroQol 5-D, and the Health-related Quality  
47  
48 of Life Questionnaire for the Elderly with Dementia.<sup>65-67</sup> A higher score indicates higher QoL.  
49  
50 Tailored interventions had an overall small effect on QoL at post-intervention (SMD<sub>pooled</sub> =  
51  
52 0.45; 95% CI: 0.25 to 0.64, p < 0.001), and no significant heterogeneity was found (I<sup>2</sup> = 11.56%,  
53  
54 p > 0.05).  
55  
56  
57

58 <Insert Figure 2>

1  
2  
3 Sixteen studies reported the outcome of depression,<sup>16, 26, 28-30, 32, 39, 43-46, 48-50, 52, 58</sup> measured  
4 by the Cornell Scale for Depression in Dementia, the Geriatric Depression Scale, the  
5 Multidimensional Observation Scale for Elderly Subjects, the Geriatric Depression Scale, the  
6 Neuropsychiatric Inventory subscale for depression, or Patient Health Questionnaire-9.<sup>18, 19, 68-</sup>  
7  
8  
9  
10  
11  
12  
13  
14  
15  
16  
17  
18  
19  
20  
21  
22  
23  
24  
25  
26  
27  
28  
29  
30  
31  
32  
33  
34  
35  
36  
37  
38  
39  
40  
41  
42  
43  
44  
45  
46  
47  
48  
49  
50  
51  
52  
53  
54  
55  
56  
57  
58  
59  
60

<sup>70</sup> A higher score indicates more depression. Thirteen RCT studies with 14 tailored activities indicated those activities had a small overall effect on depression at post-intervention (SMD<sub>pooled</sub> = -0.26; 95% CI: -0.40 to -0.12,  $p < 0.001$ ), and no significant heterogeneity was found (Supplementary Figure 5). The remaining three studies were excluded from the meta-analysis because of their quasi-experimental design or lack of comparable data,<sup>32, 44, 50</sup> and only one study found no difference in reducing depression between IG and CG.<sup>44</sup>

Seven studies with nine interventions reported the outcome of engagement.<sup>16, 38, 39, 41, 42, 51,</sup>  
<sup>52</sup> The measurements of engagement included one item on the ABMI, the Menorah Park Engagement Scale (MPES), direct observation or caregiver report.<sup>61, 71</sup> A higher score indicates a higher level of engagement. The meta-analysis indicated that tailored interventions of eight matched IGs and CGs in six studies had an overall large effect on the level of engagement at post-intervention (SMD<sub>pooled</sub> = 0.86; 95% CI: 0.23 to 1.48,  $p < 0.001$ ) (Supplementary Figure 6). Significant heterogeneity was found, primarily generated by the outlier study whose intervention specifically targeted participants' self-identity roles and which reported large effects on engagement (SMD<sub>pooled</sub> = 3.52; 95% CI: 2.87 to 4.17,  $p < 0.001$ ).<sup>39</sup> Removal of this study resulted in lower and non-significant heterogeneity with a significant small effect size (SMD<sub>adjusted pooled</sub> = 0.47; 95% CI: 0.23 to 0.60,  $p < 0.001$ ). One study with a quasi-experimental design reported increased engagement post-intervention.<sup>38</sup>

### ***Subgroup analysis***

Subgroup analysis was performed to test the difference of the effects of tailored activities with different levels of personalisation on outcomes (Figures 3 & 4). Studies with a high level of

1  
2  
3 personalisation tailored activities had a significant and the largest effect size regarding the  
4 reduction of BPSD ( $SMD_{pooled} = -0.52$ , 95% CI: -0.74 to -0.29,  $p < 0.001$ ) with non-significant  
5 heterogeneity, followed by medium ( $SMD_{pooled} = -0.38$ , 95% CI: -0.79 to 0.03,  $p = 0.071$ ) and  
6 low groups ( $SMD_{pooled} = -0.15$ , 95% CI: -0.44 to 0.14,  $p = 0.076$ ), although both the latter two  
7 groups had marginally significant effect sizes and significant heterogeneity. The high group  
8 had a moderate effect size on improvement in QoL ( $SMD_{pooled} = 0.52$ , 95% CI: 0.16 to 0.89,  
9  $p < 0.01$ ), followed by the medium group ( $SMD_{pooled} = 0.41$ , 95% CI: 0.07 to 0.74,  $p < 0.05$ ).  
10 Only one study with a low level of personalisation tailored activities reported the outcome of  
11 QoL with moderate effect size ( $SMD = 0.72$ , 95% CI: 0.08 to 1.36,  $p < 0.05$ ).  
12  
13  
14  
15  
16  
17  
18  
19  
20  
21  
22  
23

24 <Insert Figure 3>

25 <Insert Figure 4>

26  
27  
28 Subgroup analysis was performed to test the difference of the effects of the level of  
29 personalisation on depression and engagement (Supplementary Figures 7 & 8). The medium  
30 group had a moderate effect size regarding reduction in depression ( $SMD_{pooled} = -0.64$ , 95%  
31 CI: -1.14 to -0.15,  $p < 0.05$ ), followed by the high group ( $SMD_{pooled} = -0.33$ , 95% CI: -0.54 to  
32 -0.12,  $p < 0.01$ ). The three studies with a medium level of personalisation of tailored activities  
33 all involved social or group interaction components that have beneficial effects on PWD mental  
34 health. Only one study rated high on tailoring had a large effect on improving engagement level  
35 post-intervention ( $SMD = 0.85$ , 95% CI: 0.32 to 1.38,  $p < 0.01$ ). The medium group had a small  
36 effect size ( $SMD_{pooled} = 0.44$ , 95% CI: 0.07 to 0.80,  $p < 0.05$ ), followed by the low group  
37 ( $SMD_{pooled} = 0.39$ , 95% CI: 0.04 to 0.74,  $p < 0.05$ ).  
38  
39  
40  
41  
42  
43  
44  
45  
46  
47  
48  
49  
50

### 51 ***Sensitivity analysis***

52 We conducted a series of sensitivity analyses that excluded studies that combined participants  
53 with dementia and those with cognitive impairment. No substantial differences were found  
54 between the findings of studies focussing exclusively on people with dementia and studies that  
55  
56  
57  
58  
59  
60

1  
2  
3 included participants with dementia and participants with cognitive impairment  
4  
5 (Supplementary Table 6). Sensitivity analyses were also conducted to examine whether the  
6  
7 effect sizes of tailored activities on the outcomes of interest were associated with each study's  
8  
9 sample size. The only significant association was found between sample size and effect size on  
10  
11 QoL. We also tested whether a study's intervention mode (individual, group and mixed with  
12  
13 mixed mode set as the reference group) would be associated with its findings. No significant  
14  
15 associations were found between intervention mode and the outcomes.  
16  
17  
18  
19  
20  
21

## 22 **Discussion**

23  
24 Our systematic review aimed to assess the degree of personalisation of tailored activities and  
25  
26 estimate the effect of levels of personalisation of tailored activities on reducing BPSD,  
27  
28 improving QoL and other relevant outcomes among PWD. Thirty-five studies met our  
29  
30 inclusion criteria, covering a total of 2,390 participants from 16 countries/regions. The  
31  
32 activities included in the interventions comprised physical, cognitive, music and multiple  
33  
34 activities.  
35  
36

37  
38 We employed meta-analysis to estimate the overall effects of tailored activities on the  
39  
40 outcomes of BPSD, QoL, depression and engagement. Our findings on the effect sizes of  
41  
42 tailored activities of the outcomes of interests differ from previous review studies. First, we  
43  
44 found that tailored activities slightly reduced BPSD, consistent with previous meta-analyses  
45  
46 targeting facilities, communities, and PWD living in their own home.<sup>10-12</sup> Second, we found  
47  
48 that tailored activities had a small effect on improving QoL, compared with previous reviews  
49  
50 that found inconclusive evidence regarding QoL: no effect in facilities, and a slight  
51  
52 improvement in both community- and home-based settings.<sup>10-12</sup> Third, our findings showed  
53  
54 that tailored activities had small effects on depression, and large effects on engagement,  
55  
56 contradicting previous reviews reporting little or no effect on these outcomes.<sup>11, 12</sup>  
57  
58  
59  
60

1  
2  
3 Unlike previous review studies, we further developed the rating scheme of tailoring level  
4 based on three essential components: assessment for tailoring, individualisation in intervention  
5 design and person-centred care in implementation. Based on our rating scheme, the activities  
6 with optimal tailoring conditions possess the following characteristics. In the assessment stage,  
7 systematic interviews on individuals' characteristics were conducted. In the design stage, two  
8 or more domains of individuals' characteristics were targeted in the activity plan, including  
9 capabilities, preferences, interests, life experience, and external environment. In the  
10 implementation stage, interventionists were allowed high flexibility and any modifications  
11 based on their professional judgement to accommodate the spontaneous needs of PWD during  
12 the intervention. Overall, we rated only 12 studies as high level of personalisation of tailored  
13 activities, 11 as medium, 11 as low, and one study was rated as mixed because it had 3-arm  
14 intervention groups with one medium and two low levels of tailoring activities for comparison.

15  
16  
17  
18  
19  
20  
21  
22  
23  
24  
25  
26  
27  
28  
29  
30  
31 Based on our rating scheme, we extended previous review studies to investigate how the  
32 degree of tailoring influenced intervention effectiveness on the outcomes of interest.  
33 Interventions with a high level of personalisation of tailored activities had a significant and  
34 moderate effect, followed by medium (small) and low groups (trivial); the latter two groups  
35 had significant heterogeneity and marginally significant effect sizes. Interventions rated as  
36 having a high level of personalisation had a moderate effect size on improving QoL, followed  
37 by the medium group. Only one study with a low level of personalisation of tailored activities  
38 reported the outcome of QoL with moderate effect size. These findings support our rating  
39 scheme as the overall goals of tailoring activities are to reduce BPSD and improve QoL.<sup>54, 56</sup> A  
40 similar pattern was found in the level of engagement. However, because the degree of  
41 personalisation was rated high in one study only, this should be interpreted with caution.

42  
43  
44  
45  
46  
47  
48  
49  
50  
51  
52  
53  
54  
55  
56 This systematic review has several limitations. The generalizability of our results may be  
57 limited since we included English-language studies only. The included studies had risks of bias  
58  
59  
60

1  
2  
3 that may undermine the quality of evidence. Furthermore, noticeable heterogeneity was found  
4 among studies with outcomes of BPSD and engagement, which may affect the conclusions  
5 synthesised from these studies. Thus, these results must be interpreted with caution. In addition,  
6 the rating scheme for the level of personalisation was subjective regarding the level of  
7 assessments for tailoring and the degree of person-centred care in implementation.  
8  
9

10  
11  
12  
13  
14  
15 This review has implications for clinical practice. It provides new insights into non-  
16 pharmacological tailored activities by developing a rating scheme for the level of  
17 personalisation and tested its validity by investigating the effectiveness of interventions with  
18 different levels of tailoring on BPSD and QoL. Healthcare professionals and practitioners can  
19 use our findings to tailor interventions to benefit patients' outcomes. We recommend the  
20 application of structural and comprehensive assessment approaches to identify and address two  
21 or more PWD characteristics (capacities, preferences, habits and living environment etc.) in  
22 designing tailored activities, and allow interventionists to use their professional judgment to  
23 modify the interventions to respond to spontaneous needs of PWD to develop tailored activities  
24 with a high level of personalisation.  
25  
26  
27  
28  
29  
30  
31  
32  
33  
34  
35  
36

37  
38 Our systematic review has implications for future intervention research. Fourteen studies  
39 had no more than 20 participants for each arm, and only ten RCTs were judged as low risk.  
40 Evaluation studies should adhere to current methodological standards, e.g., a randomised and  
41 concealed allocation, adequate blinding (at least participants and outcome assessors), and  
42 recruitment of adequate samples.<sup>23</sup>  
43  
44  
45  
46  
47  
48

## 49 **CONCLUSION**

50  
51 This systematic review shows that tailored activities slightly reduced BPSD and depression,  
52 had a small effect on improving QoL, and had large effects on facilitating the level of  
53 engagement among PWD. Additionally, we advanced existing literature by proposing and  
54  
55  
56  
57  
58  
59  
60

1  
2  
3 testing the validity of a rating scheme for the level of personalisation. Additional high-quality  
4  
5 tailored intervention studies with sufficient samples are needed.  
6  
7  
8  
9  
10  
11  
12  
13  
14  
15  
16  
17  
18  
19  
20  
21  
22  
23  
24  
25  
26  
27  
28  
29  
30  
31  
32  
33  
34  
35  
36  
37  
38  
39  
40  
41  
42  
43  
44  
45  
46  
47  
48  
49  
50  
51  
52  
53  
54  
55  
56  
57  
58  
59  
60

For peer review only



1  
2  
3 **Contributors** SYL wrote the systematic review, performed the preliminary searches and data  
4 extraction, conducted quality assessments and drafted the systematic review paper. SYL, AYZ,  
5 TYL and JCPC designed the rating scheme for the level of personalisation. MSLM cross-  
6 checked data extraction and performed quality ratings independently. GHYW and TYSL made  
7 substantial contributions to the conception and design of the systematic review and assisted  
8 SYL, AYZ, TYL and JCPC to resolve any discrepancies regarding study inclusion, data  
9 extraction and quality ratings. All authors offered critical revisions for the systematic review  
10 manuscript.  
11  
12

13 **Funding** This work was supported by a donation from Mr Tin Hing-Sin Sam to promote non-  
14 pharmacological interventions for people with dementia and their caregivers in the  
15 community.  
16  
17

18 **Competing interests** none.  
19

20 **Provenance and peer review** Not commissioned; externally peer reviewed.  
21  
22

23 **Data sharing statement** No additional data are available.  
24  
25  
26  
27  
28  
29  
30  
31  
32  
33  
34  
35  
36  
37  
38  
39  
40  
41  
42  
43  
44  
45  
46  
47  
48  
49  
50  
51  
52  
53  
54  
55  
56  
57  
58  
59  
60

## References

1. World Health Organization. Dementia 2019 [Available from: <https://www.who.int/news-room/fact-sheets/detail/dementia>].
2. Kales HC, Gitlin LN, Lyketsos CG. Assessment and management of behavioral and psychological symptoms of dementia. *BMJ*. 2015;350.
3. Gitlin LN, Kales HC, Lyketsos CG. Nonpharmacologic management of behavioral symptoms in dementia. *JAMA*. 2012;308(19):2020-9.
4. de Oliveira AM, Radanovic M, de Mello PCH, Buchain PC, Vizzotto ADB, Celestino DL, et al. Nonpharmacological interventions to reduce behavioral and psychological symptoms of dementia: a systematic review. *Biomed Res Int*. 2015; 218980.
5. NICE. Dementia: Assessment, management and support for people living with dementia and their carers [NG97] 2018 [updated June 2018. Available from: <https://www.nice.org.uk/guidance/ng97>].
6. NICE. Dementia: Quality standard [QS184. 2019.
7. Trahan MA, Kuo J, Carlson MC, Gitlin LN. A systematic review of strategies to foster activity engagement in persons with dementia. *Health Educ Behav*. 2014;41(1 Suppl):70S-83S.
8. Testad I, Corbett A, Aarsland D, Lexow KO, Fossey J, Woods B, et al. The value of personalized psychosocial interventions to address behavioral and psychological symptoms in people with dementia living in care home settings: a systematic review. *Int Psychogeriatr*. 2014;26(7):1083-98.
9. Travers C, Brooks D, Hines S, O'Reilly M, McMaster M, He W, et al. Effectiveness of meaningful occupation interventions for people living with dementia in residential aged care: A systematic review. *JBI Database System Rev Implement Rep*. 2016;14(12):163-225.
10. Mohler R, Renom A, Renom H, Meyer G. Personally tailored activities for improving psychosocial outcomes for people with dementia in long-term care. *Cochrane Db Syst Rev*. 2018(2).
11. Mohler R, Renom A, Renom H, Meyer G. Personally tailored activities for improving psychosocial outcomes for people with dementia in community settings. *Cochrane Db Syst Rev*. 2020(8).
12. Möhler R, Renom A, Renom H, Meyer G. Personally tailored activities for people with dementia living in their own homes. *Cochrane Db Syst Rev* 2020. 2020.
13. Bennett S, Laver K, Voigt-Radloff S, Letts L, Clemson L, Graff M, et al. Occupational therapy for people with dementia and their family carers provided at home: a systematic review and meta-analysis. *BMJ Open*. 2019;9(11).
14. Macaulay S. The broken lens of BPSD: Why we need to rethink the way we label the behavior of people who live with Alzheimer disease. *J Am Med Dir Assoc*. 2018;19(2):177-80.
15. Chenoweth L, King MT, Jeon Y-H, Brodaty H, Stein-Parbury J, Norman R, et al. Caring for Aged Dementia Care Resident Study (CADRES) of person-centred care, dementia-care mapping, and usual care in dementia: a cluster-randomized trial. *Lancet Neurol*. 2009;8(4):317-25.
16. Gitlin LNP, Winter LP, Burke JPOTRLF, Chernett NMPH, Dennis MPP, Hauck WWP. Tailored activities to manage neuropsychiatric behaviors in persons with dementia and reduce caregiver burden: a randomised pilot study. *Am J Geriatr Psychiatry*. 2008;16(3):229-39.
17. Page MJ, McKenzie JE, Bossuyt PM, Boutron I, Hoffmann TC, Mulrow CD, et al. The PRISMA 2020 statement: an updated guideline for reporting systematic reviews. *BMJ*. 2021;372:n71.
18. Cummings JL, Mega M, Gray K, Rosenbergthompson S, Carusi DA, Gornbein J. The neuropsychiatric inventory - Comprehensive assessment of psychopathology in dementia. *Neurology*. 1994;44(12):2308-14.
19. Alexopoulos GS, Abrams RC, Young RC, Shamoian CA. Cornell Scale for Depression in Dementia. *Biol Psychiat*. 1988;23(3):271-84.
20. Cohen-Mansfield J, Billig N. Agitated behaviors in the elderly. I. A conceptual review. *J Am Geriatr Soc*. 1986;34(10):711-21.
21. Cochrane Effective Practice and Organisation of Care (EPOC). Describing interventions in EPOC reviews 2017 [Available from: <https://epoc.cochrane.org/resources/epoc-resources-review-authors>].

22. Cohen J. Statistical power analysis for the behavioral sciences: Academic Press; 2013.
23. Higgins JP, Green S. Cochrane handbook for systematic reviews of interventions. Chichester: John Wiley & Sons; 2011.
24. Higgins JP, Li T, Deeks JJ. Choosing effect measures and computing estimates of effect: The Cochrane Collaboration; 2019 [Available from: [www.training.cochrane.org/handbook](http://www.training.cochrane.org/handbook)].
25. Sterne JAC, Savovic J, Page MJ, Elbers RG, Blencowe NS, Boutron I, et al. RoB 2: A revised tool for assessing risk of bias in randomized trials. *BMJ*. 2019;366.
26. Lam CWL, Lui WCV, Luk NYD, Chau R, So C, Poon V, et al. Effectiveness of an individualized functional training program on affective disturbances and functional skills in mild and moderate dementia - a randomized control trial. *I J Geriatr Psychiatry*. 2009;25(2):133-41.
27. Holthoff VA, Marschner K, Scharf M, Steding J, Meyer S, Koch R, et al. Effects of physical activity training in patients with Alzheimer's Dementia: results of a pilot RCT study. *Plos One*. 2015;10(4).
28. Telenius EW, Engedal K, Bergl, A. Effect of a high-intensity exercise program on physical function and mental health in nursing home residents with dementia: an assessor blinded randomized controlled trial. *Plos One*. 2015;10(5).
29. Davison TED, Nayer KBID, Coxon SP, de Bono AP, Eppingstall BMA, Jeon Y-HP, et al. A personalized multimedia device to treat agitated behavior and improve mood in people with dementia: a pilot study. *Geriatr Nurs*. 2016;37(1):25.
30. Giuli C, Papa R, Lattanzio F, Postacchini D. The effects of cognitive training for elderly: results from My Mind Project. *Rejuvenation Res*. 2016;19(6):485-494.
31. Garland K, Beer E, Eppingstall B, O'Connor DW. A comparison of two treatments of agitated behavior in nursing home residents with dementia: simulated family presence and preferred music. *Am J Geriatr Psychiatry*. 2007;15(6):514-21.
32. Sung H-C, Chang AM, Lee W-L. A preferred music listening intervention to reduce anxiety in older adults with dementia in nursing homes. *J Clin Nurs*. 2009;19(7):1056-64.
33. Lin Y, Chu H, Yang C-Y, Chen C-H, Chen S-G, Chang H-J, et al. Effectiveness of group music intervention against agitated behavior in elderly persons with dementia. *I J Geriatr Psychiatry*. 2011;26(7):670-8.
34. Ridder HMO, Stige B, Qvale LG, Gold C. Individual music therapy for agitation in dementia: an exploratory randomized controlled trial. *Aging Ment Health*. 2013;17(6):667-78.
35. Sakamoto M, Ando H, Tsutou A. Comparing the effects of different individualized music interventions for elderly individuals with severe dementia. *Int Psychogeriatr*. 2013;25(5):775-84.
36. Kwak J, Anderson K, O'Connell Valuch K. Findings From a prospective randomized controlled trial of an individualized music listening program for persons with dementia. *J Appl Gerontol*. 2018;733464818778991.
37. Weise L, Töpfer NF, Deux J, Wilz G. Feasibility and effects of individualized recorded music for people with dementia: a pilot RCT study. *Nordic J Music Ther*. 2020;29(1):39-56.
38. Orsulic-Jeras S, Judge KS, Camp CJ. Montessori-based activities for long-term care residents with advanced dementia: effects on engagement and affect. *Gerontologist*. 2000;40(1):107-11.
39. Cohen-Mansfield J, Parpura-Gill A, Gol, er H. Utilization of self-identity roles for designing interventions for persons with dementia. *J Gerontol B Psychol Sci Soc Sci*. 2006;61(4):P202-P12.
40. Cohen-Mansfield J, Libin A, Marx MS. Nonpharmacological treatment of agitation: a controlled trial of systematic individualized intervention. *J Gerontol A Biol Sci Med Sci*. 2007;62(8):908-16.
41. Kolanowski A, Litaker M, Buettner L, Moeller J, Costa PT, Jr. A randomized clinical trial of theory-based activities for the behavioral symptoms of dementia in nursing home residents. *J Am Geriatr Soc*. 2011;59(6):1032-41.
42. van der Ploeg ES, Eppingstall B, Camp CJ, Runci SJ, Taffe J, O'Connor DW. A randomized crossover trial to study the effect of personalized, one-to-one interaction using Montessori-based activities on agitation, affect, and engagement in nursing home residents with dementia. *Int Psychogeriatr*. 2013;25(4):565-75.
43. Yoon JE, Lee SM, Lim HS, Kim TH, Jeon JKN, Mun MH. The effects of cognitive activity combined with active extremity exercise on balance, walking activity, memory level and quality of life of an older adult sample with dementia. *J Phys Ther Sci*. 2013;25(12):1601-4.

- 1
- 2
- 3
- 4 44. Toba K, Nakamura Y, Endo H, Okochi J, Tanaka Y, Inaniwa C, et al. Intensive rehabilitation
- 5 for dementia improved cognitive function and reduced behavioral disturbance in geriatric health
- 6 service facilities in Japan. *Geriatr Gerontol Int*. 2014;14(1):206-11.
- 7 45. Lu YYF, Bakas T, Yang ZY, Weaver MT, Austrom MG, Haase JE. Feasibility and effect
- 8 sizes of the revised daily engagement of meaningful activities intervention for individuals with mild
- 9 cognitive impairment and their caregivers. *J Gerontol Nurs*. 2016;42(3):45-58.
- 10 46. Prick AE, de Lange J, Scherder E, Twisk J, Pot AM. The effects of a multicomponent dyadic
- 11 intervention on the mood, behavior, and physical health of people with dementia: a randomized
- 12 controlled trial. *Clin Interv Aging*. 2016;11:383-95.
- 13 47. Li DM, Li XX. The effect of folk recreation program in improving symptoms: a study of
- 14 Chinese elder dementia patients. *I J Geriatr Psychiatry*. 2016;32(8):901-8.
- 15 48. Tanaka S, Honda S, Nakano H, Sato Y, Araya K, Yamaguchi H. Comparison between group
- 16 and personal rehabilitation for dementia in a geriatric health service facility: single-blinded
- 17 randomized controlled study. *Psychogeriatrics*. 2017;17(3):177-85.
- 18 49. Jeon Y-H, Krein L, Simpson JM, Szanton SL, Clemson L, Naismith SL, et al. Feasibility and
- 19 potential effects of interdisciplinary home-based reablement program (I-HARP) for people with
- 20 cognitive and functional decline: a pilot trial. *Aging Ment Health*. 2019.
- 21 50. Huber A, Oppikofer S, Meister L, Langensteiner F, Meier N, et al. Music and memory: the
- 22 impact of individualized music listening on depression, agitation, and positive emotions in persons
- 23 with dementia. *Act Adapt Aging*. 2021;45(1).
- 24 51. Gitlin LNP, Winter LP, Dennis MPPE, Hodgson NPRN, Hauck WWP. A biobehavioral
- 25 home-based intervention and the well-being of patients with dementia and their caregivers: the COPE
- 26 Randomized Trial. *JAMA*. 2010;304(9):983-91.
- 27 52. Bailey EM, Stevens AB, LaRocca MA, Scogin F. A randomized controlled trial of a
- 28 therapeutic intervention for nursing home residents with dementia and depressive symptoms. *J Appl*
- 29 *Gerontol*. 2017;36(7):895-908.
- 30 53. Gitlin LN, Arthur P, Piersol C, Hessels V, Wu SS, Dai YF, et al. Targeting behavioral
- 31 symptoms and functional decline in dementia: a randomized clinical trial. *J Am Geriatr Soc*.
- 32 2017;66(2):339-45.
- 33 54. Novelli M, Machado SCB, Lima GB, Cantatore L, Sena BP, Rodrigues RS, et al. Effects of
- 34 the Tailored Activity Program in Brazil (TAP-BR) for persons with dementia: a randomized pilot
- 35 trial. *Alzheimer Dis Assoc Disord*. 2018;32(4):339-45.
- 36 55. Oliveira A, Martini R, Radanovic M, Homem de Mello PC, Buchain PC, Dias Vizzotto A, et
- 37 al. An intervention to reduce neuropsychiatric symptoms and caregiver burden in dementia:
- 38 preliminary results from a randomized trial of the Tailored Activity Program–Outpatient Version. *I J*
- 39 *Geriatr Psychiatry*. 2018.
- 40 56. O'Connor CM, Clemson L, Brodaty H, Low LF, Jeon YH, Gitlin LN, et al. The Tailored
- 41 Activity Program (TAP) to address behavioral disturbances in frontotemporal dementia: a feasibility
- 42 and pilot study. *Disabil Rehabil*. 2019;41(3):299-310.
- 43 57. Van Haitsma KS, Curyto K, Abbott KM, Towsley GL, Spector A, Kleban M. A randomized
- 44 controlled trial for an individualized positive psychosocial intervention for the affective and
- 45 behavioral symptoms of dementia in nursing home residents. *J Gerontol B Psychol Sci Soc Sci*.
- 46 2013;70(1):35-45.
- 47 58. Dechamps A, Alban R, Jen J, Decamps A, Traissac T, Dehail P. Individualized cognition-
- 48 action intervention to prevent behavioral disturbances and functional decline in institutionalized older
- 49 adults: a randomized pilot trial. *I J Geriatr Psychiatry*. 2009;25(8):850-60.
- 50 59. Cohen-Mansfield J, Thein K, Marx MS, Dakheel-Ali M, Freedman L. Efficacy of
- 51 nonpharmacologic interventions for agitation in advanced dementia: a randomized, placebo-controlled
- 52 trial. *J Clin Psychiatry*. 2012;73(9):1255-61.
- 53 60. Hall GR, Buckwalter KC. Progressively lowered stress threshold: a conceptual model for care
- 54 of adults with Alzheimer's disease. *Arch Psychiatr Nurs*. 1987;1(6):399-406.
- 55 61. Cohen-Mansfield J, Werner P, Marx MS. An observational study of agitation in agitated
- 56 nursing home residents. *Int Psychogeriatr*. 1989;1(2):153-65.
- 57
- 58
- 59
- 60

- 1  
2  
3 62. Logsdon RG, Teri L, Weiner MF, Gibbons LE, Raskind M, Peskind E, et al. Assessment of  
4 agitation in Alzheimer's disease: the Agitated Behavior in Dementia Scale. *J Am Geriatr Soc*.  
5 1999;47(11):1354-8.  
6 63. Reisberg B, Borenstein J, Salob SP, Ferris SH, Franssen E, Georgotas A. Behavioral  
7 symptoms in Alzheimer's disease: phenomenology and treatment. *J Clin Psychiatry*. 1987;48  
8 Suppl:9-15.  
9 64. Machida A. [Estimation of the reliability and validity of the short version of the 28-item  
10 Dementia Behavior Disturbance Scale]. *Nihon Ronen Igakkai Zasshi*. 2012;49(4):463-7.  
11 65. Logsdon RG, Gibbons LE, McCurry SM, Teri L. Quality of life in Alzheimer's disease:  
12 patient and caregiver reports. *J Ment Health Aging*. 1999;5(1):21-32.  
13 66. Williams A. Euroqol - a new facility for the measurement of health-related quality-of-life.  
14 *Health Policy*. 1990;16(3):199-208.  
15 67. Terada S, Ishizu H, Fujisawa Y, Fujita D, Yokota O, Nakashima H, et al. Development and  
16 evaluation of a health-related quality of life questionnaire for the elderly with dementia in Japan. *I J*  
17 *Geriatr Psychiatry*. 2002;17(9):851-8.  
18 68. Yesavage JA. Geriatric Depression Scale. *Psychopharmacol Bull*. 1988;24(4):709-11.  
19 69. Helmes E, Csapo KG, Short JA. Standardization and validation of the Multidimensional  
20 Observation Scale for Elderly Subjects (Moses). *J Gerontol*. 1987;42(4):395-405.  
21 70. Kroenke K, Spitzer RL, Williams JBW. The PHQ-9 - Validity of a brief depression severity  
22 measure. *J Gen Intern Med*. 2001;16(9):606-13.  
23 71. Skrajner MJ, Camp CJ. Resident-assisted Montessori Programming (RAMP™): use of a  
24 small group reading activity run by persons with dementia in adult day health care and long-term care  
25 settings. *Am J Alzheimers Dis Other Dement*. 2007;22(1):27-36.  
26  
27  
28  
29  
30  
31  
32  
33  
34  
35  
36  
37  
38  
39  
40  
41  
42  
43  
44  
45  
46  
47  
48  
49  
50  
51  
52  
53  
54  
55  
56  
57  
58  
59  
60

Table 1. Level of personalisation of tailored activities

| #  | Author (Year)                  | Level of assessment for tailoring                                                                                                                                                                                                                               | Degree of individualisation in design                                                                                                   | Degree of person-centred care in intervention delivery                                                                                                          | Level of personalisation |
|----|--------------------------------|-----------------------------------------------------------------------------------------------------------------------------------------------------------------------------------------------------------------------------------------------------------------|-----------------------------------------------------------------------------------------------------------------------------------------|-----------------------------------------------------------------------------------------------------------------------------------------------------------------|--------------------------|
| 1  | Orsulic-Jeras et al. (2000)    | Structured assessments of participants' preferences using the Montessori-Based Assessment System developed by the authors for selecting appropriate activities for participants                                                                                 | Preserved abilities and preference (Two and above)                                                                                      | No description                                                                                                                                                  | Medium                   |
| 2  | Cohen Mansfield (2006)         | Structured assessments for tailoring relating to participants' medical history, self-identity, and social functioning                                                                                                                                           | Identity roles, the severity of dementia and ability (Two and above)                                                                    | High flexibility. The choice of intervention was affected by availability of materials, family members' cooperation and the practicability of the intervention. | High                     |
| 3  | Garland et al. (2007)          | No pre-assessments for tailoring                                                                                                                                                                                                                                | Music preference. (One)                                                                                                                 | No description                                                                                                                                                  | Low                      |
| 4  | Cohen- Mansfield et al. (2007) | Structured assessments for tailoring regarding participants' medical history, self-identity, and social functioning                                                                                                                                             | Ability, past history and preference (Two and above)                                                                                    | High flexibility. The study clearly indicated that flexibility was essential element of intervention                                                            | High                     |
| 5  | Gitlin et al. (2008)           | Semi structured interviews to discern daily routines, and the Pleasant Event Schedule to identify previous/current activity interests. Interventionists observed dyadic communication and home environmental features and assessed dementia patients.           | Capabilities, previous roles, habits, interests, home environment and dyadic communication (Two and above)                              | High flexibility. Activity prescriptions were reviewed and modified if necessary, during the implementation.                                                    | High                     |
| 6  | Lam et al. (2009)              | Structured assessments for tailoring. Individual functional profiles were mapped with personal selection.                                                                                                                                                       | Abilities, preference, & needs. (Two and above)                                                                                         | High flexibility. Training content was dynamic and adjusted to the changing needs of PWD                                                                        | High                     |
| 7  | Dechamps et al. (2009)         | Semi-structured assessments on physical/psychological functions                                                                                                                                                                                                 | Abilities (One)                                                                                                                         | Some flexibility.                                                                                                                                               | Medium                   |
| 8  | Gitlin et al. (2010)           | Structured assessments of PWD capabilities, medical testing, home environment, caregiver communication, and caregiver-identified concerns. Interventionists interviewed caregivers to identify patient's routines, previous/current roles, habits and interest. | Home environment, Caregiver-identified concerns and capabilities, routines, previous /current roles, habits & interests (Two and above) | High flexibility                                                                                                                                                | High                     |
| 9  | Sung et al. (2010)             | Semi-structured assessments of participants' preferences and information on the importance of music to life                                                                                                                                                     | Music preference (One)                                                                                                                  | Low                                                                                                                                                             | Low                      |
| 10 | Kolanowski et al. (2011)       | Structured assessments of capacities and personality of interest                                                                                                                                                                                                | Capacity and Preference (Two and above)                                                                                                 | High flexibility. Great flexibility was allowed to use staff's own clinical judgment and knowledge to implement individualised activities.                      | Medium                   |
| a  |                                |                                                                                                                                                                                                                                                                 | Capacity (One)                                                                                                                          | No description                                                                                                                                                  | Low                      |
| b  |                                |                                                                                                                                                                                                                                                                 | Preference (One)                                                                                                                        | No description                                                                                                                                                  | Low                      |
| 11 | Lin et al. (2011)              | Semi-structured pre-assessment of participants' music preference                                                                                                                                                                                                | Music Preference (One)                                                                                                                  | No description                                                                                                                                                  | Low                      |
| 12 | Cohen-Mansfield et al. (2012)  | Structured assessments of participants' medical history, self-identity, and social functioning.                                                                                                                                                                 | Past identity, ability and preferences (Two and above)                                                                                  | Some flexibility. Interventionists were allowed to seek approval for possible adjustment if needed.                                                             | Medium                   |
| 13 | van der Ploeg et al. (2012)    | Structured assessments (Myers Menorah Park/Montessori-Based Assessment System) for tailoring                                                                                                                                                                    | Preserved abilities and Interest (Two and above)                                                                                        | High flexibility. Flexibility to respond to patients' perceived level of interest was allowed                                                                   | Medium                   |
| 14 | Ridder et al. (2013)           | Semi-structured interviews to elicit life-story information either from journal or relatives.                                                                                                                                                                   | Life-story/history, psychosocial needs (Two and above)                                                                                  | Low/some flexibility. No specific description.                                                                                                                  | Medium                   |
| 15 | Sakamoto et al. (2013)         | Structural assessments for tailoring to analyse participants' personal life history, and interview with each participant and family member                                                                                                                      | Music preference, special memories (Two and above)                                                                                      | High flexibility.                                                                                                                                               | High                     |
| 16 | Van Haitsma et al. (2013)      | Incomprehensive pre-assessments                                                                                                                                                                                                                                 | Interest and ability (Two and above)                                                                                                    | Some flexibility. The intervention was adjusted according to the time when residents need stimulation.                                                          | Medium                   |
| 17 | Yoon et al. (2013)             | Incomprehensive pre-assessments                                                                                                                                                                                                                                 | Ability (One)                                                                                                                           | Low flexibility                                                                                                                                                 | Low                      |
| 18 | Toba et al. (2014)             | Pre-assessment of individuals' abilities and disabilities to evaluate how to enhance abilities and compensate for disabilities                                                                                                                                  | Abilities (One)                                                                                                                         | No description                                                                                                                                                  | Medium                   |

Table 1. (Continued) Level of personalisation of tailored activities

| #  | Author (Year)          | Level of assessment for tailoring                                                                                                                                                                                                     | Degree of individualisation in design                                                                                                                 | Degree of person-centred care in delivery                                                                                                                            | Level of personalisation |
|----|------------------------|---------------------------------------------------------------------------------------------------------------------------------------------------------------------------------------------------------------------------------------|-------------------------------------------------------------------------------------------------------------------------------------------------------|----------------------------------------------------------------------------------------------------------------------------------------------------------------------|--------------------------|
| 19 | Holthoff et al. (2015) | Incomprehensive pre-assessments                                                                                                                                                                                                       | Ability (One)                                                                                                                                         | Low flexibility                                                                                                                                                      | Low                      |
| 20 | Telenius et al. (2015) | Incomprehensive pre-assessments                                                                                                                                                                                                       | Ability (One)                                                                                                                                         | No description.                                                                                                                                                      | Low                      |
| 21 | Davison et al. (2016)  | Pre-assessment. The researchers met with participants and their families to determine the preferred materials.                                                                                                                        | Interest only (One)                                                                                                                                   | Low flexibility                                                                                                                                                      | Low                      |
| 22 | Giuli et al. (2016)    | Incomprehensive pre-assessments on patients' cognitive status                                                                                                                                                                         | Cognition (One)                                                                                                                                       | No description                                                                                                                                                       | Low                      |
| 23 | Lu et al. (2016)       | Pre-assessments on PWD functional ability, types and frequencies of meaningful activity, perceived barriers to engaging in activities                                                                                                 | Functional ability, types and frequencies of meaningful activity (Two and above)                                                                      | No description.                                                                                                                                                      | Medium                   |
| 24 | Prick et al. (2016)    | Structured assessments for tailoring                                                                                                                                                                                                  | Physical capacities, information about pleasant activities for the dyad (Two and above)                                                               | Medium to High                                                                                                                                                       | High                     |
| 25 | Bailey et al (2017)    | No pre-assessments for tailoring.                                                                                                                                                                                                     | Interest and past history (Two and above)                                                                                                             | High flexibility. The group leaders had the flexibility to develop and tailor the individualised behavioural activity programmes during implementation               | Medium                   |
| 26 | Li et al. (2017)       | The preliminary survey was implemented to investigate participants' preferences, cultural background, cognitive function and abilities.                                                                                               | Interest and capacities (Two and above)                                                                                                               | Some flexibility. The interventionist was allowed to choose activities to match PWD ability and interest during personalised activity                                | Medium                   |
| 27 | Gitlin et al. (2017)   | Structured assessments of participants' capacities, fall risk, daily routines, interests, caregivers (routines, employment, readiness), and environments (lighting, seating, clutter, noise)                                          | Capabilities, functioning, interest, environment, caregivers (Two and above)                                                                          | High flexibility (prescriptions were reviewed and modified if necessary during implementation)                                                                       | High                     |
| 28 | Tanaka et al. (2017)   | Incomprehensive pre-assessments                                                                                                                                                                                                       | Personal history (One)                                                                                                                                | No description.                                                                                                                                                      | Low                      |
| 29 | Novelli et al. (2018)  | Structured assessments to identify preserved capacities, previous interests, frequency/intensity of BPSD in the PWD, daily care routines of caregivers and home environment features.                                                 | Capabilities, previous interests, frequency, and intensity of BPSD in PWD, daily care routines of the caregiver and home environment. (Two and above) | High flexibility. Interventionists are allowed to tailor and adjust the chosen activities to match participants' capabilities during implementation.                 | High                     |
| 30 | Kwak et al. (2018)     | Unstructured interviews with participants and their family members as the best sources for identifying an individual's music preferences                                                                                              | Music preference and songs significant to PWD life experience (Two and above)                                                                         | High flexibility. The intervention allowed flexibility for facility staff to use their own clinical judgment and knowledge to tailor and implement the intervention. | Medium                   |
| 31 | Joen et al. (2019)     | Comprehensive individual assessment (physical, medical and psychosocial) and their environment, medication review and adherence, a review of communication with health service providers and cognitive needs and existing strategies. | Capacities/needs, environment (Two and above)                                                                                                         | High flexibility. A multi- and interdisciplinary plan tailored to meet the client's needs to enhance self-care ability using person-centred goal setting.            | High                     |
| 32 | Oliveira et al. (2019) | Structured assessments. Semi structured investigator-developed interview to identify daily routines, and the Pleasant Event Schedule to identify previous and current activity interests.                                             | Cognitive and functional capacities, previous abilities, interests, and roles (Two and above)                                                         | High flexibility (prescriptions were reviewed and modified if necessary during the implementation)                                                                   | High                     |
| 33 | O'Connor et al. (2019) | Structured assessments of participants' capacities, fall risk, daily routines, interests, caregivers (routines, employment, readiness), and environments (lighting, seating, clutter, noise)                                          | Capabilities, functioning, interest, environment, caregivers (Two and above)                                                                          | High flexibility (prescriptions were reviewed and modified if necessary during implementation)                                                                       | High                     |
| 34 | Weise et al. (2020)    | Pre-assessment of participants' personal music preference from family members, nursing staff and directly from participants                                                                                                           | Preference for music (One)                                                                                                                            | Low flexibility                                                                                                                                                      | Low                      |
| 35 | Huber et al. (2020)    | Incomprehensive pre-assessments                                                                                                                                                                                                       | Preference (One)                                                                                                                                      | Low flexibility                                                                                                                                                      | Low                      |

Notes: One = The intervention design was tailored for only one aspect of PWD characteristics; Two and above = The intervention design was tailored for two and above aspects of PWD characteristics

## FIGURE LEGENDS

Figure 1. Effects of tailored interventions on challenging behaviour at post-intervention (N=20). Notes: SD=Standard Deviation, CI= Confidence Interval, C=activities tailored for capacities of participants only, P = activities tailored for preference of participants only, C+P= activities tailored for capacities and preference of participants. IG = Intervention Group, CG=Control Group.

Notes: Fixed effect:  $SMD_{pooled} = -0.32$ , 95% CI = -0.42 to -0.22,  $p < 0.001$

Figure 2. Effects of tailored interventions on quality of life at post-intervention (N=9). Notes: SD=Standard Deviation, CI= Confidence Interval. IG = Intervention Group, CG=Control Group.

Notes: Fixed effect:  $SMD_{pooled} = 0.42$ , 95% CI = 0.24 – 0.59,  $p < 0.001$

Figure 3. Subgroup analysis: Effects of tailored interventions on challenging behaviour at post-intervention by level of personalisation (N=20). Notes: SD=Standard Deviation, CI= Confidence Interval, C=activities tailored for capacities of participants only, P = activities tailored for preference of participants only, C+P= activities tailored for capacities and preference of participants. IG = Intervention Group, CG=Control Group.

Notes: (1) High group. Fixed effect:  $SMD_{pooled} = -0.46$ , 95% CI = -0.62 to -0.30,  $p < 0.001$ ; Middle group. Fixed effect:  $SMD_{pooled} = -0.34$ , 95% CI = -0.51 to -0.16,  $p < 0.001$ ; Low group. Fixed effect:  $SMD_{pooled} = -0.11$ , 95% CI = -0.30 to 0.08,  $p = 0.254$ . (2) Test for the difference across three subgroups: Q-value = 7.78, df (Q) = 2, p-value = 0.02.

Figure 4. Subgroup analysis: Effects of tailored interventions on quality of life at post-intervention by level of personalisation (N=9). Notes: SD=Standard Deviation, CI= Confidence Interval. IG = Intervention Group, CG=Control Group.

Notes: High group, fixed effect:  $SMD_{pooled} = 0.39$ , 95% CI = 0.17 to 0.60,  $p < 0.001$ ; Middle group, fixed effect:  $SMD_{pooled} = 0.41$ , 95% CI = 0.07 to 0.74,  $p = 0.017$ ; Low group, fixed effect:  $SMD_{pooled} = 0.72$ , 95% CI = 0.08 to 1.36,  $p = 0.027$ . (2) Test for the difference across three subgroups: Q-value = 0.94, df (Q) = 2, p-value = 0.626.



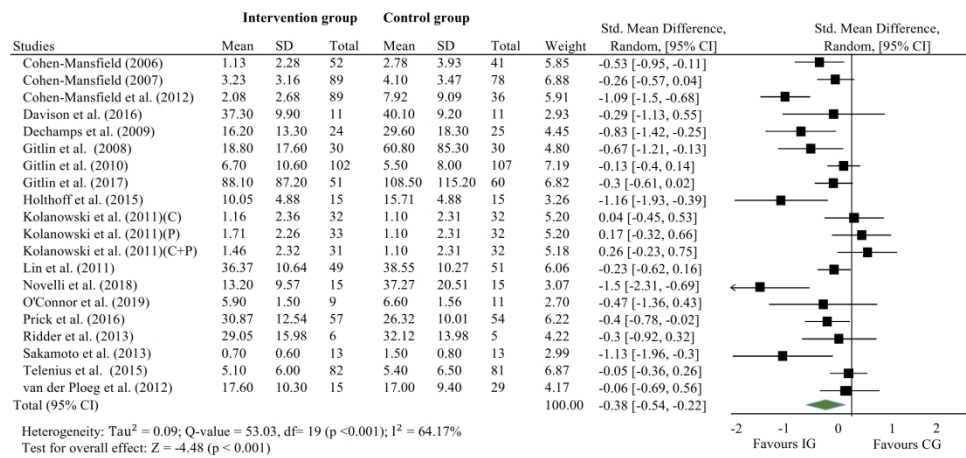

Figure 1. Effects of tailored interventions on challenging behaviour at post-intervention (N=20).

Figure 1. Effects of tailored interventions on challenging behaviour at post-intervention (N=20).

267x140mm (300 x 300 DPI)

1  
2  
3  
4  
5  
6  
7  
8  
9  
10  
11  
12  
13  
14  
15  
16  
17  
18  
19  
20  
21  
22  
23  
24  
25  
26  
27  
28  
29  
30  
31  
32  
33  
34  
35  
36  
37  
38  
39  
40  
41  
42  
43  
44  
45  
46  
47  
48  
49  
50  
51  
52  
53  
54  
55  
56  
57  
58  
59  
60

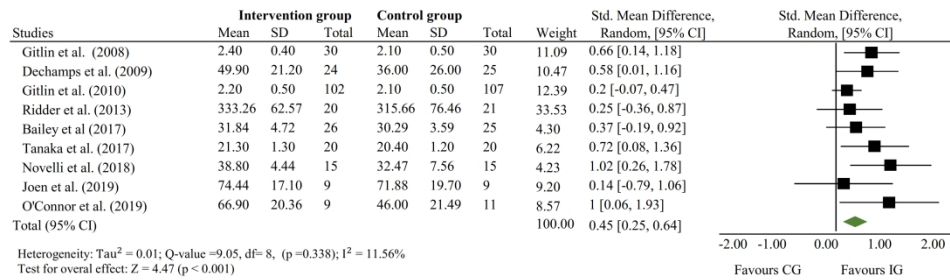

Figure 2. Effects of tailored interventions on quality of life at post-intervention (N=9)

Figure 2. Effects of tailored interventions on quality of life at post-intervention (N=9).

272x94mm (300 x 300 DPI)

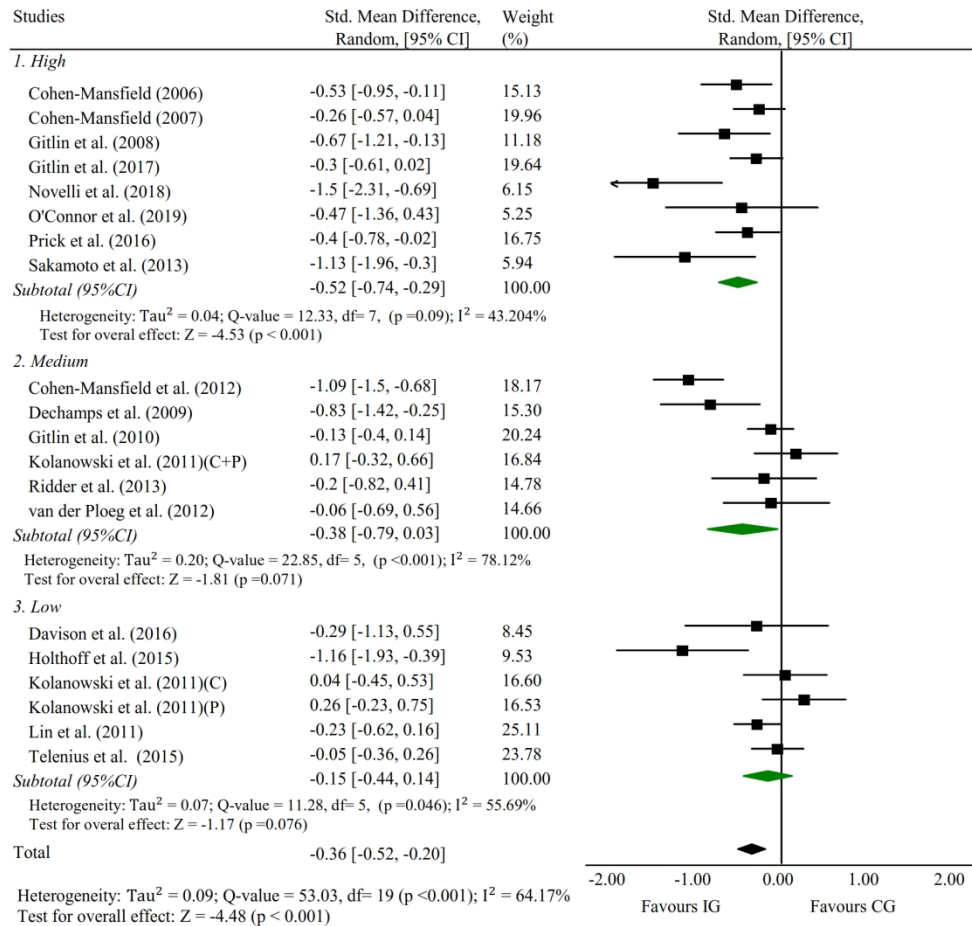

Figure 3. Subgroup analysis: Effects of tailored interventions on challenging behaviour at post-intervention by level of personalisation (N=20)

Figure 3. Subgroup analysis: Effects of tailored interventions on challenging behaviour at post-intervention by the level of personalisation (N=20).

172x177mm (300 x 300 DPI)

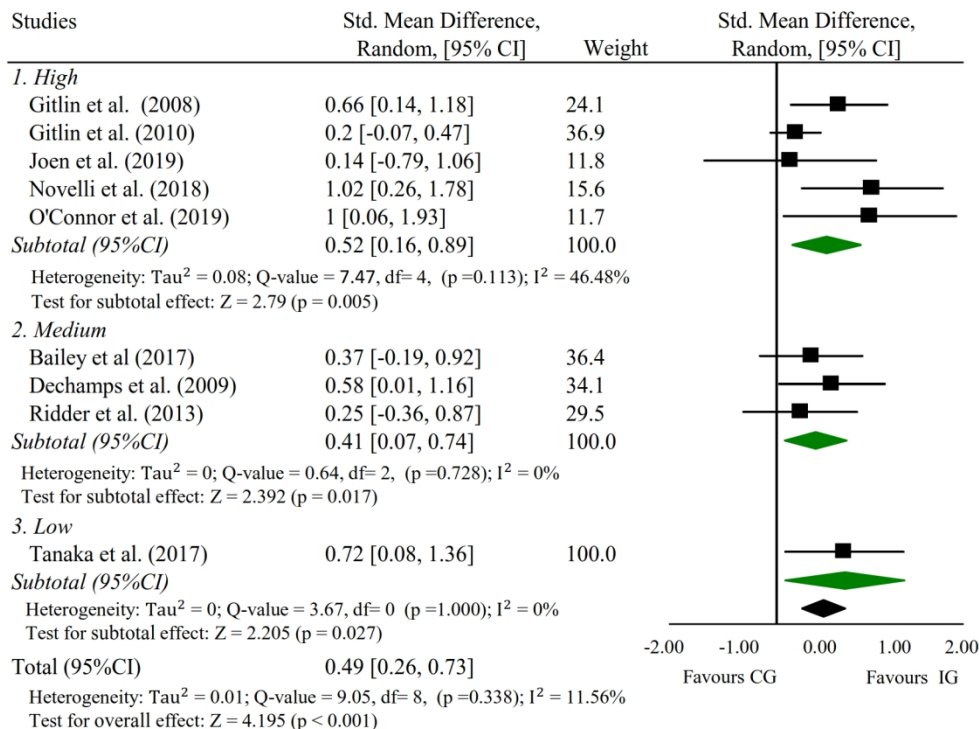

Figure 4. Subgroup analysis: Effects of tailored interventions on quality of life at post-intervention by level of personalisation (N=9).

Figure 4. Subgroup analysis: Effects of tailored interventions on quality of life at post-intervention by level of personalisation (N=9).

151x125mm (300 x 300 DPI)

1  
2  
3  
4  
5  
6  
7  
8  
9  
10  
11  
12  
13  
14  
15  
16  
17  
18  
19  
20  
21  
22  
23  
24  
25  
26  
27  
28  
29  
30  
31  
32  
33  
34  
35  
36  
37  
38  
39  
40  
41  
42  
43  
44  
45  
46  
47

Supplementary Table 1. Summary of existing reviews on tailored activities for people with dementia/cognitive impairment

| Author (Year)          | Study aim                                                                                                                        | Range of Years & # of studies included | Study Design                                                                                          | Targeted Group                | Settings                      | Targeted Outcomes                                                                                                 | Main Findings                                                                                                                                                                                                                                                                                                                       |
|------------------------|----------------------------------------------------------------------------------------------------------------------------------|----------------------------------------|-------------------------------------------------------------------------------------------------------|-------------------------------|-------------------------------|-------------------------------------------------------------------------------------------------------------------|-------------------------------------------------------------------------------------------------------------------------------------------------------------------------------------------------------------------------------------------------------------------------------------------------------------------------------------|
| 1.Trahan et al. (2014) | To identify different ways of engaging persons living with dementia effectively to enhance their quality of life and reduce BPSD | 2000-2011 (N=28)                       | RCT, crossover, single-subject, etc.                                                                  | Older adults aged 60 or above | Community or residential care | Patient engagement, behavioural disturbance, psychological symptoms, another patient-oriented behavioural outcome | Compared with the consistent effect of changes to space and social demands on engagement and BPSD, changes to objects are more common but the impact is mixed.                                                                                                                                                                      |
| 2.Testad et al. (2014) | To review the benefits of personalised psychosocial interventions for BPSD                                                       | 2000-2012 (N=40)                       | RCT, quasi-experimental design                                                                        | People with dementia          | Care home and nursing home    | Depression, anxiety, agitation, and psychotic symptoms                                                            | Pleasant activities with or without social interactions and reminiscence therapy showed strong effect on reducing agitation and improving mood respectively. The tailoring of care package according to the symptoms a person is experiencing is probably one of the explanations for the differential effects of the interventions |
| 3.Travers et al (2016) | To review the effectiveness of meaningful occupational interventions on persons living with dementia                             | 2004-2015 (N=34)                       | RCT, quasi-experimental design, pre-post-test design, cohort study, case study, cross-sectional study | People with dementia          | Nursing home                  | Depression, anxiety, agitation, wandering, apathy, quality of life, mood, function, cognition, sleep              | Individualised activities/recreational interventions work well on a range of BPSD; preferred music shows effectiveness on agitation, depression and anxiety.                                                                                                                                                                        |

Supplementary Table 1 (Continued). Summary of existing reviews on tailored activities for people with dementia/cognitive impairment

| Author (Year)         | Study aim                                                                                                                                    | Range of Years & # of studies included | Study Design                   | Targeted Group                        | Settings                  | Targeted Outcomes                                                        | Main Findings                                                                                                                                                                                                                                                        |
|-----------------------|----------------------------------------------------------------------------------------------------------------------------------------------|----------------------------------------|--------------------------------|---------------------------------------|---------------------------|--------------------------------------------------------------------------|----------------------------------------------------------------------------------------------------------------------------------------------------------------------------------------------------------------------------------------------------------------------|
| 4.Möhler et al (2018) | To assess the effects of personally tailored activities on psychosocial outcomes of persons living with dementia in long-term care           | Up to 2017 (N=7)                       | RCT, quasi-experimental design | People with dementia                  | Long-term care facilities | Challenging behaviours, quality of life                                  | As the effect of personally tailored activities on challenging behaviours of persons living with dementia is slight, recommendations on how to modify the factors (e.g., delivery, duration, frequency) for enhancing the intervention effectiveness cannot be made. |
| 5.Möhler et al (2020) | To assess the effects of activities tailored to personal interests on psychosocial outcomes of persons living with dementia in the community | Up to 2019 (N=5)                       | RCT, quasi-experimental design | People with mild to moderate dementia | Community or home         | Challenging behaviours, quality of life                                  | Personally tailored activities may improve challenging behaviours and quality of life but have no effect on depression, affect, passivity, and engagement.                                                                                                           |
| 6.Möhler et al (2020) | To assess the effects of offering people with dementia living in their own homes activities tailored to their personal interests.            | Up to 2019 (N=5)                       | RCT                            | People with dementia                  | Home only                 | challenging behaviour, quality of life, depression, and engagement, etc. | Personally tailored activities may improve challenging behaviour and slightly improve quality of life of people with dementia living in their own homes, but may have little or no effect on depression and engagement                                               |

Note: The full references for six reviews summarized in this table can be found in the Reference section #7-12.

Supplementary Table 2. Full search strategy

| Database                                                                                                                                          | Search strategy                                                                                                                                                                                                                                                                                                                                                                                                                                                                                                                                                                 |
|---------------------------------------------------------------------------------------------------------------------------------------------------|---------------------------------------------------------------------------------------------------------------------------------------------------------------------------------------------------------------------------------------------------------------------------------------------------------------------------------------------------------------------------------------------------------------------------------------------------------------------------------------------------------------------------------------------------------------------------------|
| <b>ProQuest</b> (APA PsycArticles, APA PsycInfo, Applied Social Sciences Index & Abstracts, Sociological Abstracts, Medical Database, PAIS Index) | ab("Cognitive impairment" OR "cognitive disorder" OR "dementia" OR "Alzheimer") AND ab("tailor*" OR "engage*" OR "individualized" OR "individual-centered" OR "personalized" OR "personalized" OR "person-centered") AND ab("activities" OR "program" OR "therapy" OR "intervention" OR "treatment*")                                                                                                                                                                                                                                                                           |
| <b>Web of Science</b>                                                                                                                             | TS=("Cognitive impairment" OR "cognitive disorder" OR "dementia" OR "Alzheimer" ) AND TS=("tailor*" OR "engage*" OR "individualized" OR "individual-centered" OR "personalized" OR "personalized" OR "person-centered") AND TS=("activities" OR "program*" OR "therapy" OR "intervention" OR "treatment")                                                                                                                                                                                                                                                                       |
| <b>PubMed</b>                                                                                                                                     | ((("Cognitive impairment"[Title/Abstract] OR "cognitive disorder"[Title/Abstract] OR "dementia"[Title/Abstract] OR "Alzheimer"[Title/Abstract])) AND ("tailor*" [Title/Abstract] OR "engage*" [Title/Abstract] OR "individualized" [Title/Abstract] OR "individual-centered" [Title/Abstract] OR "personalized" [Title/Abstract] OR "personalized" [Title/Abstract] OR "person-centered" [Title/Abstract])) AND ("activities" [Title/Abstract] OR "program*" [Title/Abstract] OR "therapy" [Title/Abstract] OR "intervention" [Title/Abstract] OR "treatment" [Title/Abstract]) |
| <b>Ovid</b> (Global health, Embase, Social Work abstract)                                                                                         | [Title and abstract search] (Cognitive impairment OR cognitive disorder OR dementia OR Alzheimer) AND ("tailor*" OR "engage*" OR "individualized" OR "individual-centered" OR "personalized" OR "person-centered") AND ("activities" OR "program" OR "therapy" OR "intervention" OR "treatment*")                                                                                                                                                                                                                                                                               |
| <b>Cochrane Library</b>                                                                                                                           | [Title and abstract search] (Cognitive impairment OR cognitive disorder OR dementia OR Alzheimer) AND ("tailor*" OR "engage*" OR "individualized" OR "individual-centered" OR "personalized" OR "person-centered") AND ("activities" OR "program" OR "therapy" OR "intervention" OR "treatment*")                                                                                                                                                                                                                                                                               |
| <b>Cumulative Index to Nursing and Allied Health Literature (CINAHL)</b>                                                                          | [Title and abstract search] (Cognitive impairment OR cognitive disorder OR dementia OR Alzheimer) AND ("tailor*" OR "engage*" OR "individualized" OR "individual-centered" OR "personalized" OR "person-centered") AND ("activities" OR "program" OR "therapy" OR "intervention" OR "treatment*")                                                                                                                                                                                                                                                                               |

Note: No limit on the publication date

Supplementary Table 3. Rating scheme for assessing the degree of personalisation in tailored activities

| Level         | Criteria                                                                                                                                                                                                                                                                                                                                                                                                                                                                                                                                                                                                                                                                                        |
|---------------|-------------------------------------------------------------------------------------------------------------------------------------------------------------------------------------------------------------------------------------------------------------------------------------------------------------------------------------------------------------------------------------------------------------------------------------------------------------------------------------------------------------------------------------------------------------------------------------------------------------------------------------------------------------------------------------------------|
| <b>Low</b>    | <ul style="list-style-type: none"> <li>• <b>Unclear/incomprehensive:</b> No pre-assessment / Pre-assessments were not clearly described / Pre-assessments on one PWD characteristic only, without describing how the assessment results were utilised to inform the tailored activities design;</li> <li>• Activity design targeted <b>only one domain</b> of tailoring as listed below, including capabilities, preferences, interests, life experience, and living environment;</li> <li>• Interventionists had <b>low flexibility and only minimal/marginal modifications</b> were allowed.</li> </ul>                                                                                       |
| <b>Middle</b> | <ul style="list-style-type: none"> <li>• <b>Semi-structured:</b> Pre-assessments were conducted by unstructured or semi-structured interviews, with some description on how the assessment results were utilised to inform the tailored activities design;</li> <li>• Activity design targeted <b>two or more domains</b> of tailoring systematically as listed below, including capabilities, preferences, interests, life experience, and external environment;</li> <li>• Interventionists had <b>some flexibility and some modifications</b> could be made based on their clinical knowledge and observation to accommodate the spontaneous needs of PWD during the intervention</li> </ul> |
| <b>High</b>   | <ul style="list-style-type: none"> <li>• <b>Structured:</b> Pre-assessments were conducted by structured interviews, with clear and detailed description on how the assessment results were utilised to systematically inform the tailored activities design;</li> <li>• Activity design targeted <b>two or more domains</b> of tailoring systematically as listed below, including capabilities, preferences, interests, life experience, and external environment;</li> <li>• Interventionists had <b>high flexibility and any modifications</b> based on their clinical knowledge and observation to accommodate the spontaneous needs of PWD during the intervention.</li> </ul>            |



Supplementary Table 4. Characteristics of included studies

| #  | Author (Year)<br>[Countries]                    | Age<br>Mean(SD)                  | Dementia<br>types/stage                   | Sample<br>size    | Study<br>design      | Study setting                          |
|----|-------------------------------------------------|----------------------------------|-------------------------------------------|-------------------|----------------------|----------------------------------------|
| 1  | Orsulic-Jeras et al.<br>(2000) [USA]            | I: 88 (4.3)<br>C: 88 (4.3)       | Dementia                                  | I: 16;<br>C: 16   | Quasi-<br>experiment | LTC facility                           |
| 2  | Cohen-Mansfield<br>(2006) [USA]                 | I: 87.2 (6.6)<br>C: 87.3 (7.1)   | Dementia                                  | I: 52;<br>C: 41   | RCT                  | LTC facility and<br>adult day centres  |
| 3  | Garland et al.<br>(2007) [Australia]            | I: 79.0 (66-93)<br>C: 79 (66-93) | Dementia                                  | I: 10;<br>C: 10   | RCT                  | LTC facility                           |
| 4  | Cohen-Mansfield<br>(2007) [USA]                 | I: 88 (6.4)<br>C: 85 (8.6)       | Dementia                                  | I: 89;<br>C: 78   | RCT                  | LTC facility                           |
| 5  | Gitlin et al. (2008)<br>[USA]                   | I: 78 (9.2)<br>C: 80.8 (9.5)     | Dementia                                  | I: 30;<br>C: 30   | RCT                  | Home                                   |
| 6  | Dechamps et al.<br>(2009) [France]              | I: 83.2 (8.3)<br>C: 83.2 (8.3)   | Dementia                                  | I: 24;<br>C: 25   | RCT                  | Hospital                               |
| 7  | Gitlin et al. (2010)<br>[USA]                   | I: 83.1 (7.8)<br>C: 81.8 (9.9)   | Dementia                                  | I: 102;<br>C: 107 | RCT                  | Community                              |
| 8  | Lam et al. (2010)<br>[Hong Kong]                | I: 83.1 (6.9)<br>C: 83.8 (7)     | Dementia                                  | I: 37;<br>C: 37   | RCT                  | LTC facility                           |
| 9  | Sung et al. (2010)<br>[Taiwan]                  | I: 78.1 (7.2)<br>C: 82.7 (7.4)   | Dementia                                  | I: 29;<br>C: 23   | Quasi-<br>experiment | LTC facility                           |
| 10 | Kolanowski et al.<br>(2011) [USA]               | I: 86 (7.1)<br>C: 85.9 (4.9)     | Dementia                                  | I: 31;<br>C: 32   | RCT                  | LTC facility                           |
| 11 | Lin et al. (2011)<br>[Taiwan]                   | I: 81.5 (7.3)<br>C: 82.2 (6.3)   | Dementia                                  | I: 49;<br>C: 51   | RCT                  | LTC facility                           |
| 12 | Cohen-Mansfield et<br>al. (2012) [USA]          | I: 85.9 (8.6)<br>C: 85.3 (9.6)   | Dementia                                  | I: 89;<br>C: 36   | RCT                  | LTC facility                           |
| 13 | van der Ploeg et al.<br>(2012) [Australia]      | I: 78.1 (9.8)<br>C: 78.1 (9.8)   | Dementia                                  | I: 15;<br>C: 29   | Crossover<br>RCT     | LTC facility                           |
| 14 | Ridder et al. (2013)<br>[Denmark and<br>Norway] | I: 82.2 (8.8)<br>C: 80.2 (8.7)   | Dementia                                  | I: 20;<br>C: 21   | RCT                  | LTC facility                           |
| 15 | Sakamoto et al.<br>(2013) [Japan]               | I: 80.4 (7.4)<br>C: 81.5 (7.9)   | Dementia                                  | I: 13;<br>C: 13   | RCT                  | Hospital                               |
| 16 | Van Haitsma et al.<br>(2013) [USA]              | I: 87.7 (8.7)<br>C: 89.2 (6.9)   | Dementia                                  | I: 44;<br>C: 93   | RCT                  | LTC facility                           |
| 17 | Yoon et al. (2013)<br>[Korea]                   | I: 77.9 (7.5)<br>C: 70.1 (12.2)  | Dementia                                  | I: 11;<br>C: 9    | RCT                  | LTC facility                           |
| 18 | Toba et al. (2014)<br>[Japan]                   | I: 84.1 (7.1)<br>C: 87.3 (7.1)   | Dementia                                  | I: 158;<br>C: 54  | Quasi-<br>experiment | Geriatric health<br>service facilities |
| 19 | Holthoff et al.<br>(2015) [Germany]             | I: 72.4 (4.3)<br>C: 70.7 (5.4)   | Early and moderate<br>stage AD            | I: 15;<br>C: 15   | RCT                  | Home                                   |
| 20 | Telenius et al.<br>(2015) [Norway]              | I: 86.9 (7)<br>C: 86.4 (7.8)     | Mild or moderate<br>dementia              | I: 82;<br>C: 81   | RCT                  | LTC facility                           |
| 21 | Davison et al.<br>(2016)<br>[Australia]         | I: 86 (5.2)<br>C: 86 (5.2)       | Dementia                                  | I: 11;<br>C: 11   | RCT                  | LTC facility                           |
| 22 | Giuli et al. (2016)<br>[Italy]                  | I: 76 (6.3)<br>C: 76.5 (5.7)     | Mild cognitive<br>impairment/<br>Dementia | I: 48;<br>C: 49   | RCT                  | Hospital                               |
| 23 | Lu et al. (2016)<br>[USA]                       | I: 71.2 (0.8)<br>C: 76.5 (7.1)   | Mild cognitive<br>impairment              | I: 20;<br>C: 20   | RCT                  | Community                              |

Notes: I = Intervention group; C = control group; RCT = randomized clinical trial; LTC = long-term care

Supplementary Table 4. (Continued) Characteristics of included studies

| #  | Author (Year)<br>[Countries]          | Age<br>Mean(SD)                | Dementia<br>types/stage                  | Sample<br>size  | Study<br>design      | Study setting                        |
|----|---------------------------------------|--------------------------------|------------------------------------------|-----------------|----------------------|--------------------------------------|
| 24 | Prick et al. (2016)<br>[Netherlands]  | I: 76 (7.6)<br>C: 78 (7.2)     | Dementia                                 | I: 57;<br>C: 54 | RCT                  | Home                                 |
| 25 | Bailey et al (2017)<br>[USA]          | I: 84.4 (7.7)<br>C: 83.9 (9.2) | Mild to moderate<br>cognitive impairment | I: 26;<br>C: 25 | RCT                  | LTC facility                         |
| 26 | Li et al. (2017)<br>[China]           | I: 83.1 (4.1)<br>C: 81.1 (6.7) | Dementia                                 | I: 19;<br>C: 21 | Quasi-<br>experiment | LTC facility                         |
| 27 | Gitlin et al. (2017)<br>[USA]         | I: 80.4 (8.7)<br>C: 80.4 (8.7) | Dementia                                 | I: 51;<br>C: 60 | RCT                  | Home                                 |
| 28 | Tanaka et al. (2017)<br>[Japan]       | I: 86 (7.4)<br>C: 86.5 (8.3)   | Dementia                                 | I: 20;<br>C: 20 | RCT                  | Geriatric health<br>service facility |
| 29 | Novelli et al. (2018)<br>[Brazil]     | I: 79.4 (7.7)<br>C: 83.5 (7.1) | Dementia                                 | I: 15;<br>C: 15 | RCT                  | Community                            |
| 30 | Kwak et al. (2018)<br>[USA]           | I: 88.9 (5.4)<br>C: 84.9 (8.6) | Dementia or<br>Alzheimer's disease       | I: 30;<br>C: 29 | Crossover<br>RCT     | LTC facility                         |
| 31 | Joel et al. (2019)<br>[Australia]     | I: 79.0 (N.A)<br>C: 81.0 (N.A) | Mild cognitive<br>impairment/Dementia    | I: 9;<br>C: 9   | RCT                  | Home                                 |
| 32 | de Oliveira et al.<br>(2019) [Brazil] | I: 79 (5.7)<br>C: 78.4 (6.2)   | Dementia                                 | I: 11;<br>C: 10 | RCT                  | Community<br>medical centers         |
| 33 | O'Connor et al.<br>(2019) [Australia] | I: 62.1 (N.A)<br>C: 65.6 (N.A) | Dementia                                 | I: 9;<br>C: 11  | RCT                  | Home                                 |
| 34 | Weise et al. (2020)<br>[Germany]      | I: 85.1 (5.9)<br>C: 85.1 (5.9) | Moderate or severe<br>stages of Dementia | I: 10;<br>C: 10 | RCT                  | LTC facility                         |
| 35 | Huber et al. (2020)<br>[Switzerland]  | I: 74-92<br>C: 74-92           | Moderate to severe<br>stages of dementia | I: 10;<br>C: 13 | Quasi-<br>experiment | Community                            |

Notes: I = Intervention group; C = control group; RCT = randomized clinical trial; LTC = long-term care

Supplementary Table 5. Interventions and activities tailored for participants' characteristics

| # | Author (Year)               | PWD characteristics                                                                                                                  | Types | Content of tailored activities/intervention                                                                                                                                                                                                                                                                                                                                                     | Delivery                                                                                                       | Comparator | Outcomes                                                 | Findings                                                                                |
|---|-----------------------------|--------------------------------------------------------------------------------------------------------------------------------------|-------|-------------------------------------------------------------------------------------------------------------------------------------------------------------------------------------------------------------------------------------------------------------------------------------------------------------------------------------------------------------------------------------------------|----------------------------------------------------------------------------------------------------------------|------------|----------------------------------------------------------|-----------------------------------------------------------------------------------------|
| 1 | Orsulic-Jeras et al. (2000) | Preserved abilities                                                                                                                  | MP    | Montessori-Based Activities included individual-based and group activities. In individual activities, various aesthetically pleasing materials taken from the everyday environment were used. Group activities included memory bingo and group sorting.                                                                                                                                         | Mode: Mixed; Interventionist: Research assistant/activities therapist; Duration: 3 months. Follow-up: 6 months | usual care | Level of engagement                                      | IG showed more engagement than CG at post-intervention.                                 |
| 2 | Cohen-Mansfield (2006)      | Salience of identity roles, the severity of the dementia, ability                                                                    | MP    | Role-identity-based treatment involved a 2-step procedure, including the determination of role-identity salience and the determination of the intervention. Chosen activities were tailored for the roles identified. For example, a participant with a great sense of professional accomplishment enjoyed looking at his awards.                                                               | Mode: Individual; Interventionist: Research assistants; Duration: 5 days.                                      | usual care | BPSD (Agitation), Engagement and Depression.             | IG showed increased engagement and fewer BPSD in the treatment than CG.                 |
| 3 | Garland et al. (2007)       | Preferred songs, performers and titles.                                                                                              | MU    | Preferred music selected based on family members' reports of participants' preference.                                                                                                                                                                                                                                                                                                          | Mode: Individual; Interventionist: Researcher; Duration: 4 weeks.                                              | usual care | BPSD (Overall)                                           | No significant difference in reducing BPSD between IG and CG.                           |
| 4 | Cohen-Mansfield (2007)      | Ability, past history and preference                                                                                                 | MP    | Non-pharmacologic individualised interventions based on TREA framework                                                                                                                                                                                                                                                                                                                          | Mode: Mixed; Interventionist: Research assistants; Duration: 10 days. No follow-up assessment.                 | placebo    | BPSD                                                     | IG showed decreases in overall BPSD compared to CG at post-intervention.                |
| 5 | Gitlin et al. (2008)        | Capabilities, previous roles, habits and interests                                                                                   | MP    | TAP is based on the environmental vulnerability/reduced stress-threshold model, including a three-stage intervention: (1) structural assessments, (2) activity prescriptions, chosen activities tailored to match PWD characteristics, providing training to and working with caregivers in the implementation, and (3) helping caregivers to generalise strategies for future care challenges. | Mode: Individual; Interventionist: Occupational therapists and caregivers; Duration: 4 months.                 | wait-list  | BPSD (overall), QoL, depression, and level of engagement | IG showed greater reduction in frequency of BPSD and greater engagement than CG.        |
| 6 | Dechamps et al. (2009)      | Abilities and discourse                                                                                                              | MP    | The Cognition-Action method does not rely on the use of a specific exercise, but rather is a guidance method intended to enhance active living and social interaction using motor actions as incentives.                                                                                                                                                                                        | Mode: Individual; Interventionist: Research assistants; Duration: 12 weeks.                                    | usual care | BPSD (Overall), QoL, and depression                      | IG showed greater reduction in BPSD, depression and improvement in QoL compared to CG.  |
| 7 | Gitlin et al. (2010)        | Home environment, Caregiver-identified concerns and patient capabilities, routines, previous and current roles, habits and interests | MP    | Care of Persons with Dementia in their Environments (COPE) targeted modifiable environmental stressors to decrease sensory, physical, and cognitive demands, align with patient capabilities, and re-engage patients in daily activities.                                                                                                                                                       | Mode: Individual; Interventionist: Occupational therapists; Duration: 4 months. Follow-up: 9 months            | usual care | BPSD, QoL and engagement                                 | IG showed increases in the level of engagement compared to the CG at post-intervention. |

Supplementary Table 5. (Continued) Interventions and activities tailored for participants' characteristics

| #  | Author (Year)                 | PWD characteristics                             | Types | Content of tailored activities/intervention                                                                                                                                                                                                                                                                                                                         | Delivery                                                                                            | Comparator        | Outcomes                        | Findings                                                                       |
|----|-------------------------------|-------------------------------------------------|-------|---------------------------------------------------------------------------------------------------------------------------------------------------------------------------------------------------------------------------------------------------------------------------------------------------------------------------------------------------------------------|-----------------------------------------------------------------------------------------------------|-------------------|---------------------------------|--------------------------------------------------------------------------------|
| 8  | Lam et al. (2010)             | Abilities, preference, needs                    | P     | Individualised functional training programme                                                                                                                                                                                                                                                                                                                        | Mode: Individual; Interventionist: Occupational therapists; Duration: 8 weeks. Follow-up: 4 months  | Attention control | BPSD (Depression) and cognition | IG showed reduction in depression compared to CG only at 4-month follow up.    |
| 9  | Sung et al. (2010)            | Music preference                                | MU    | Preferred music listening intervention                                                                                                                                                                                                                                                                                                                              | Mode: Individual; Interventionist: Trained nursing staff; Duration: 6 weeks.                        | usual care        | BPSD (Depression/Anxiety)       | IG had a lower anxiety score compared with CG.                                 |
| 10 | Kolanowski et al. (2011)      | Functional level, personality style of interest | MP    | Activities derived from the Need driven Dementia-compromised Behavior model tailored to the resident's functional level (cognitive and physical) and personality style of interest<br>3-arm intervention group design:<br>(1) Personality style of interest group (PI); (2) Functional level (FL); (3) PI + FL                                                      | Mode: Group ; Interventionist: Nursing staff; Duration: 3 weeks                                     | Active control    | BPSD (Agitation) and Engagement | IG (PI) showed greater engagement than the other groups.                       |
| 11 | Lin et al. (2011)             | Music Preference                                | MU    | Group music intervention                                                                                                                                                                                                                                                                                                                                            | Mode: Group; Interventionist: Researcher; Duration: 6 weeks. One-month follow up.                   | usual care        | BPSD (Agitation)                | IG showed reduction in BPSD compared to CG at post-intervention and follow-up. |
| 12 | Cohen-Mansfield et al. (2012) | Past identity, ability and preferences          | MP    | The TREA decision tree protocol was used to identify the possible reasons for agitated behaviour, needs, and preferences of participants. The activities included simulated animal-assisted therapy, one-on-one interaction, simulated interaction, group activities, arts and crafts, physical activities, games and music based on participants' preferences etc. | Mode: Mixed; Interventionist: Research assistants; Duration: 2 weeks.                               | placebo           | BPSD (Agitation)                | IG showed reduction in total agitation compared to CG.                         |
| 13 | van der Ploeg et al. (2012)   | preserved abilities and Interest                | MP    | Montessori-based activities                                                                                                                                                                                                                                                                                                                                         | Mode: Mixed; Interventionist: Psychologists and higher degree psychology student; Duration: 4 weeks | usual care        | BPSD, engagement                | IG showed more engagement than CG.                                             |
| 14 | Ridder et al. (2013)          | life-story/history                              | MU    | Individual music therapy                                                                                                                                                                                                                                                                                                                                            | Mode: Individual; Interventionist: Clinicians; Duration: 6 weeks. Follow-up: 7 weeks.               | usual care        | BPSD (Agitation), QoL           | IG showed reduction in total agitation compared to CG at post-intervention.    |

Supplementary Table 5. (Continued) Interventions and activities tailored for participants' characteristics

| #  | Author (Year)             | PWD characteristics  | Types | Content of tailored activities/intervention                                                                                                                                                                                                 | Delivery                                                                                              | Comparator        | Outcomes                              | Findings                                                                                                                                                  |
|----|---------------------------|----------------------|-------|---------------------------------------------------------------------------------------------------------------------------------------------------------------------------------------------------------------------------------------------|-------------------------------------------------------------------------------------------------------|-------------------|---------------------------------------|-----------------------------------------------------------------------------------------------------------------------------------------------------------|
| 15 | Sakamoto et al. (2013)    | Music preference     | MU    | Individualised music interventions                                                                                                                                                                                                          | Mode: Individual; Interventionist: Music facilitator; Duration: 10 weeks.                             | usual care        | BPSD (overall)                        | Greater long-term reduction in BPSD was observed in IG compared with CG.                                                                                  |
| 16 | Van Haitsma et al. (2013) | Interest and ability | MP    | Individualised Positive Psychosocial Intervention based on participants' leisure interests that included physical exercise, music, ADLs, reminiscence and sensory stimulation.                                                              | Mode: Individual; Interventionist: Certified nursing assistants; Duration: 3 weeks                    | Attention control | BPSD (overall)                        | IG experienced more pleasure, alertness, engagement, positive touch, and positive verbal behavior compared with CG.                                       |
| 17 | Yoon et al. (2013)        | Ability level        | MP    | Cognitive activity combined with physical exercise                                                                                                                                                                                          | Mode: Group; Interventionist: Unspecified; Duration: 12 weeks                                         | Attention control | Depression                            | IG showed improvement in cognition and reduction in depression compared to CG.                                                                            |
| 18 | Toba et al. (2014)        | Abilities and needs  | MP    | Intensive rehabilitation programme included reminiscence, reality orientation, memory rehabilitation, music therapy, physical exercise, occupational therapy, speech communication therapy and learning sessions                            | Mode: Individual; Interventionist: Physical, occupational or speech therapists; Duration: 3 months    | usual care        | BPSD, depression,                     | IG showed more reduction in BPSD and improvement in cognition compared to CG.                                                                             |
| 19 | Holthoff et al. (2015)    | Ability level        | P     | Physical activity training. Patients in the intervention group trained their lower body on a movement trainer with individually preassigned training flow. Caregivers were asked to choose a familiar chair prior to commencement of study. | Mode: Unspecified; Interventionist: Caregivers/ computer; Duration: 12 weeks. 3-month follow up test. | usual care        | BPSD                                  | IG experienced stable BPSD and CG experienced increases in BPSDs at follow-up.                                                                            |
| 20 | Telenius et al. (2015)    | Performance levels   | P     | Individually fitted High-Intensity Exercise Program                                                                                                                                                                                         | Mode: Individual; Interventionist: Physiotherapist; Duration: 12 weeks                                | Attention control | BPSD, QoL, depression,                | IG experienced more reduction in BPSD compared to CG.                                                                                                     |
| 21 | Davison et al. (2016)     | Interest             | C     | Using a personal computer to play favourite music and display photographs, movies and messages selected by participants and family members                                                                                                  | Mode: Individual; Interventionist: Research staff; Duration: 4 weeks                                  | usual care        | BPSD (Agitation), Depression, Anxiety | IG experienced reduction in depression and anxiety compared to CG.                                                                                        |
| 22 | Giuli et al. (2016)       | cognitive function   | C     | Non-pharmacological intervention consisting of comprehensive cognitive training                                                                                                                                                             | Mode: Individual; Interventionist: Experienced psychologists; Duration: 10 weeks                      | usual care        | Depression and cognition              | Compared to CG, IG with Alzheimer's disease experienced improvement in cognition. IG with mild cognitive impairment experienced improvement in cognition. |

Supplementary Table 5. (Continued) Interventions and activities tailored for participants' characteristics

| #  | Author (Year)         | PWD characteristics                                                                                                                                      | Types | Content of tailored activities/intervention                                                                                                                                                                                                                                                                                                                                    | Delivery                                                                                                                           | Comparator        | Outcomes                       | Findings                                                                                                                                                                         |
|----|-----------------------|----------------------------------------------------------------------------------------------------------------------------------------------------------|-------|--------------------------------------------------------------------------------------------------------------------------------------------------------------------------------------------------------------------------------------------------------------------------------------------------------------------------------------------------------------------------------|------------------------------------------------------------------------------------------------------------------------------------|-------------------|--------------------------------|----------------------------------------------------------------------------------------------------------------------------------------------------------------------------------|
| 23 | Lu et al. (2016)      | Congruence in level of awareness of functional ability, types and frequencies of meaningful activity, perceived barriers to engaging in these activities | MP    | Daily Engagement of Meaningful Activities using the principles of problem-solving therapy and, consistent with the overall goals of this intervention, providing autonomy support by helping patients identify and prioritise meaningful activities, identify needs and goals, generate manageable solutions, and engage in self-selected activities with family support, etc. | Mode: Group; Interventionist: Trained nurse; Duration: 2 weeks. Follow up: 3 months                                                | Attention control | BPSD (Depression)              | IG showed less improvement in depressive symptoms than CG at follow-up.                                                                                                          |
| 24 | Prick et al. (2016)   | Physical capacities, information about pleasant activities for the dyad                                                                                  | MP    | Multicomponent dyadic intervention comprising physical exercise training, psychoeducation, communication skills training, and pleasant activities training.                                                                                                                                                                                                                    | Mode: Individual; Interventionist: Personal coach; Duration: 3 months. 6 month follow up.                                          | usual care        | BPSD, depression, health       | Analyses showed no beneficial effects over time on any of the outcome measures.                                                                                                  |
| 25 | Bailey et al. (2017)  | participant's specific area of interest                                                                                                                  | MP    | Multicomponent intervention including group activity sessions using question-asking-reading (QAR), reminiscence, cognitive-behavioural therapy techniques, environmental support and individualised behavioural activity programme.                                                                                                                                            | Mode: Group; Interventionist: Two upper-level graduate students in clinical psychology and one PhD psychologist; Duration: 6 weeks | usual care        | Depression, QoL and engagement | IG showed more improvement in depression than CG.                                                                                                                                |
| 26 | Li et al. (2017)      | Interest, capacities and culture background                                                                                                              | MP    | Folk recreation programme plus personalised training on daily life activities and individual activity programme according to participants' interest.                                                                                                                                                                                                                           | Mode: Mixed; Interventionist: Researcher; Duration: 16 weeks                                                                       | usual care        | BPSD                           | The folk recreation programme has the potential to improve cognitive function, ability of daily living and behavioural and psychological symptoms of older people with dementia. |
| 27 | Gitlin et al. (2017)  | Capabilities, functioning, interest, environment, caregivers                                                                                             | MP    | Tailored activity programme                                                                                                                                                                                                                                                                                                                                                    | Mode: Individual; Interventionist: Occupational therapists; Duration: 4 months                                                     | Attention control | BPSD                           | Intervention group showed reduction in BPSDs and functional dependence.                                                                                                          |
| 28 | Tanaka et al. (2017)  | Meaningfulness, personal history                                                                                                                         | MP    | Personal rehabilitation comprising cognitive rehabilitation and involving reminiscence therapy, reality orientation, and physical activity.                                                                                                                                                                                                                                    | Mode: Mixed; Interventionist: Staff member; Duration: 12 weeks                                                                     | usual care        | Depression & QoL               | No statistically significant differences between IG and CG in interested outcomes.                                                                                               |
| 29 | Novelli et al. (2018) | Capabilities, previous interests, frequency, and intensity of BPSD in PWD, daily care routines of the caregiver and home environment.                    | MP    | Tailored activity programme                                                                                                                                                                                                                                                                                                                                                    | Mode: Individual; Interventionist: Occupational therapy, caregiver; Duration: 4 months                                             | wait-list         | BPSD and QoL                   | IG experienced reduced BPSD and improvement in QoL compared to CG                                                                                                                |

Supplementary Table 5. (Continued) Interventions and activities tailored for participants' characteristics

| #  | Author (Year)             | PWD characteristics                                                           | Types | Content of tailored activities/intervention                                                                                                                                                                                                                                                                                                                                  | Delivery                                                                                                                                 | Comparator        | Outcomes           | Findings                                                                                                                                        |
|----|---------------------------|-------------------------------------------------------------------------------|-------|------------------------------------------------------------------------------------------------------------------------------------------------------------------------------------------------------------------------------------------------------------------------------------------------------------------------------------------------------------------------------|------------------------------------------------------------------------------------------------------------------------------------------|-------------------|--------------------|-------------------------------------------------------------------------------------------------------------------------------------------------|
| 30 | Kwak et al. (2018)        | Music preference                                                              | MU    | A passive music intervention using personalised music playlists delivered on digital music players.                                                                                                                                                                                                                                                                          | Mode: Individual; Interventionist: Nursing home staff; Duration: 14 weeks                                                                | usual care        | BPSD               | No statistically significant differences between IG and CG in any of the outcomes measured.                                                     |
| 31 | Joen et al. (2019)        | Capacities/needs, environment                                                 | MP    | A multi- and interdisciplinary plan tailored to meet the client's needs to enhance self-care ability and using person-centred goal setting included cognitive rehabilitation techniques, energy conservation and task simplification strategies, balance and strength exercises, pain relief management, anxiety management, problem solving, and medication simplification. | Mode: Individual; Interventionist: Occupational therapists, registered nurse, neuropsychologist; Duration: 4 months. 12 month follow-up. | usual care        | Depression and QoL | No statistically significant differences between IG and CG in any of the outcomes measured.                                                     |
| 32 | de Oliveira et al. (2019) | Cognitive and functional capacities, previous abilities, interests, and roles | MP    | Tailored activity programme                                                                                                                                                                                                                                                                                                                                                  | Mode: Individual; Interventionist: Occupational therapists; Duration: 3 months                                                           | Attention control | BPSD               | Compared to CG, IG experienced reduction in BPSD.                                                                                               |
| 33 | O'Conn or et al. (2019)   | Capabilities, functioning, interest, environment, caregivers                  | MP    | Tailored activity programme                                                                                                                                                                                                                                                                                                                                                  | Mode: Individual; Interventionist: Occupational therapists; Duration: 4 months                                                           | usual care        | BPSD and QoL       | IG showed an overall reduction of behavioural symptoms and maintenance of functional performance in the person with dementia, compared to CG.   |
| 34 | Weise et al. (2020)       | Preference for music                                                          | MU    | Individualised recorded music                                                                                                                                                                                                                                                                                                                                                | Mode: Individual; Interventionist: Social service staff and project staff; Duration: 4 weeks                                             | wait-list         | BPSD               | No significant findings on reduction in BPSD between IG and CG.                                                                                 |
| 35 | Huber et al. (2020)       | Preference, meaningfulness                                                    | MP    | Individualised music listening                                                                                                                                                                                                                                                                                                                                               | Mode: Individual; Interventionist: Caregivers/staff member; Duration: 4 weeks                                                            | usual care        | BPSD, depression   | Depression scores decreased significantly over time while agitated behaviour showed a constant moderate level without any significant decrease. |

Note: P=physical; C=cognitive; MU=musical; MP=multiple; IG=intervention group; CG=control group. BPSD = behavioural and psychological symptoms of dementia; QoL=Quality of life.

Supplementary Table 6. Sensitivity analyses: effect sizes when including studies with people with dementia only in their samples

| Outcome                  | Fixed effect models    |         | Random effect models      |         |
|--------------------------|------------------------|---------|---------------------------|---------|
|                          | SMD (95% CI)           | p-value | SMD (95% CI)              | p-value |
| <i>Main effects</i>      |                        |         |                           |         |
| BPSD                     | -0.34 (-0.44 to -0.23) | <0.001  | -0.38 (-0.56 to -0.19)    | <0.001  |
| Quality of life          | 0.43 (0.25 - 0.62)     | <0.001  | 0.52 (0.27 - 0.77)        | <0.001  |
| Depression               | -0.38 (-0.57 to -0.20) | <0.001  | -0.38 (-0.57 to -0.20)    | <0.001  |
| Engagement               | 0.58 (0.41 - 0.75)     | <0.001  | 0.84 (0.14 - 1.54)        | 0.019   |
| <i>Subgroup Analysis</i> |                        |         |                           |         |
| BPSD                     |                        |         |                           |         |
| High                     | -0.46 (-0.62 to -0.3)  | <0.001  | -0.524 (-0.752 to -0.296) | <0.001  |
| Medium                   | -0.34 (-0.51 to -0.16) | 0.000   | -0.363 (-0.774 to 0.048)  | 0.083   |
| Low                      | -0.04 (-0.29 to 0.21)  | 0.750   | -0.04 (-0.289 to 0.208)   | 0.750   |
| Quality of life          |                        |         |                           |         |
| High                     | 0.4 (0.18 to 0.62)     | <0.001  | 0.6 (0.17 to 1.04)        | 0.010   |
| Medium                   | 0.43 (0.01 to 0.85)    | 0.027   | 0.43 (0.01 to 0.85)       | 0.040   |
| Low                      | 0.72 (0.08 to 1.36)    | 0.044   | 0.72 (0.08 to 1.36)       | 0.030   |
| Depression               |                        |         |                           |         |
| High                     | -0.34 (-0.55 to -0.12) | 0.002   | -0.34 (-0.55 to -0.12)    | 0.002   |
| Medium                   | -0.75 (-1.33 to -0.17) | 0.011   | -0.75 (-1.33 to -0.17)    | 0.011   |
| Low                      | -0.38 (-0.82 to 0.06)  | 0.089   | -0.38 (-0.82 to 0.06)     | 0.089   |
| Engagement               |                        |         |                           |         |
| High                     | 0.85 (0.32 to 1.38)    | 0.002   | 0.85 (0.32 to 1.38)       | 0.002   |
| Medium                   | 0.27 (0.05 to 0.49)    | 0.018   | 0.27 (0.05 to 0.49)       | 0.018   |
| Low                      | 0.39 (0.04 to 0.74)    | 0.029   | 0.39 (0.04 to 0.74)       | 0.029   |

Notes: Excluded studies that included patients with dementia and patients with cognitive impairment in the samples. BPSD: Holthoff et al. (2015) & Telenius et al. (2015); Quality of life: Bailey et al (2017) & Jeon et al. (2019); Depression: Bailey et al(2017) & Jeon et al. (2019) & Lu et al (2016) & Giuli et al (2016); Engagement: Bailey et al (2017)



Supplementary Figure 1. The process of tailoring and rating criteria

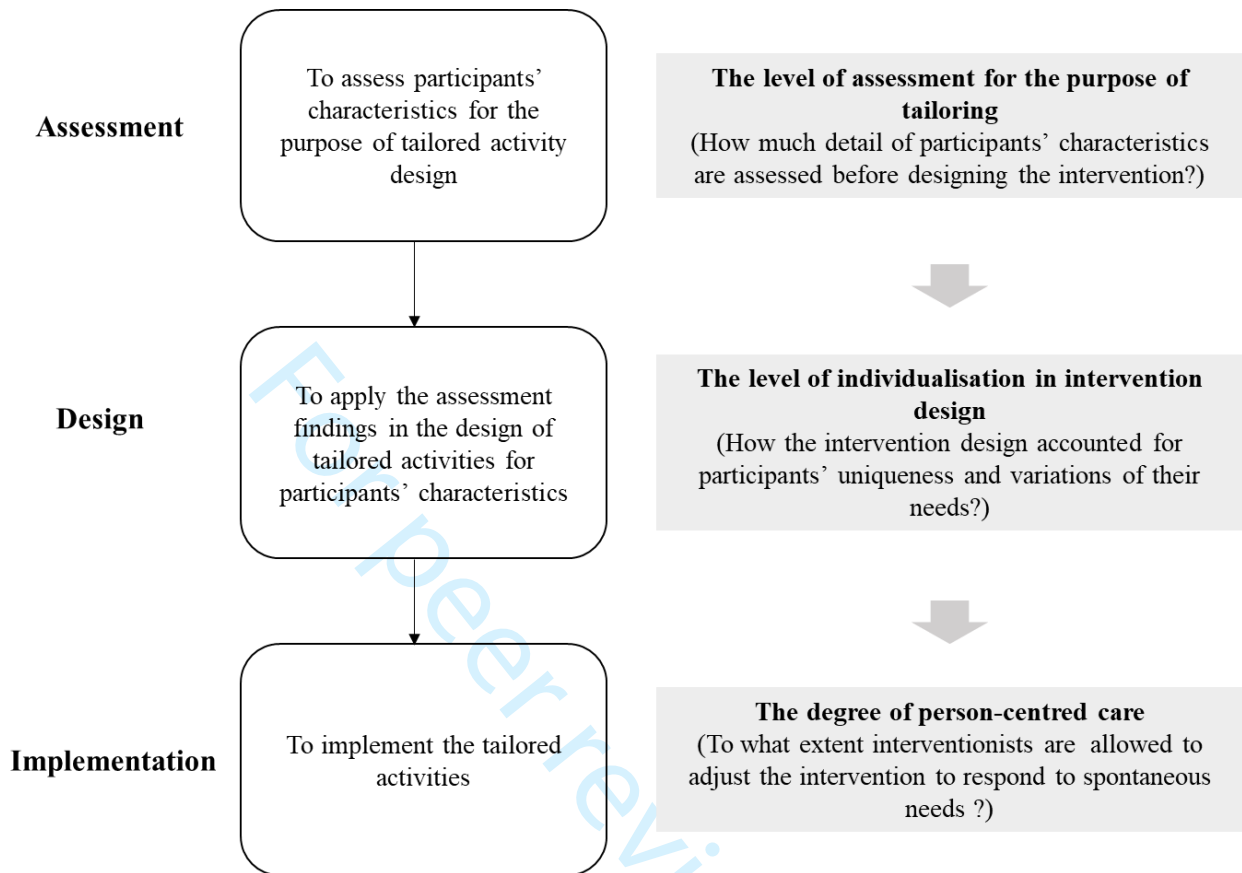

Supplementary Figure 2. Flowchart of included articles

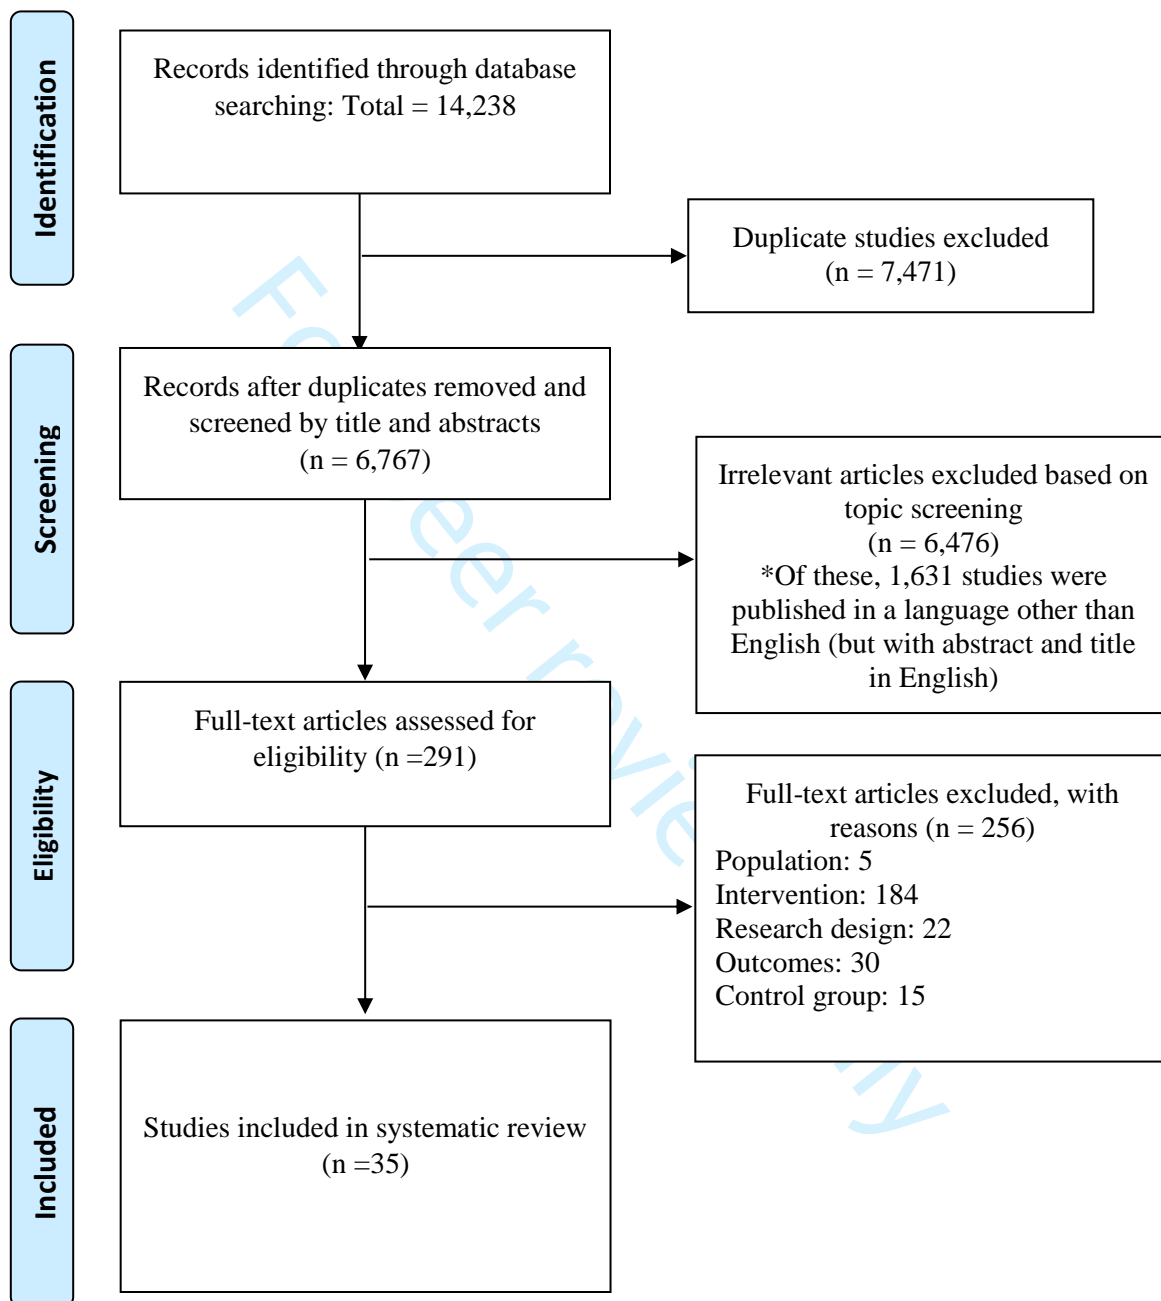

Supplementary Figure 3. Risk of Bias Graph for RCT studies (N=30)

| Study                         | Randomization process | Deviations from intended interventions | Missing outcome data | Measurement of the outcome | Selection of the reported result | Overall |
|-------------------------------|-----------------------|----------------------------------------|----------------------|----------------------------|----------------------------------|---------|
| Cohen Mansfield (2006)        | ?                     | ?                                      | +                    | ?                          | ?                                | !       |
| Garland et al. (2007)         | ?                     | ?                                      | +                    | +                          | ?                                | !       |
| Cohen-Mansfield (2007)        | ?                     | -                                      | +                    | -                          | +                                | -       |
| Gitlin et al. (2008)          | +                     | +                                      | +                    | +                          | +                                | +       |
| Dechamps et al. (2009)        | +                     | +                                      | +                    | +                          | +                                | +       |
| Gitlin et al. (2010)          | +                     | +                                      | +                    | +                          | +                                | +       |
| Lam et al. (2010)             | +                     | +                                      | +                    | +                          | +                                | +       |
| Kolanowski et al. (2011)      | +                     | +                                      | +                    | +                          | +                                | +       |
| Lin et al. (2011)             | +                     | -                                      | +                    | -                          | ?                                | -       |
| Cohen-Mansfield et al. (2012) | +                     | +                                      | +                    | +                          | +                                | +       |
| van der Ploeg et al. (2012)   | +                     | -                                      | +                    | +                          | +                                | -       |
| Ridder et al. (2013)          | +                     | ?                                      | +                    | ?                          | ?                                | !       |
| Sakamoto et al. (2013)        | ?                     | ?                                      | +                    | +                          | +                                | !       |
| Van Haitsma et al. (2013)     | +                     | ?                                      | +                    | +                          | +                                | !       |
| Yoon et al. (2013)            | +                     | -                                      | -                    | -                          | +                                | -       |
| Holthoff et al. (2015)        | +                     | -                                      | +                    | -                          | ?                                | -       |
| Telenius et al. (2015)        | +                     | -                                      | +                    | +                          | ?                                | -       |
| Davison et al. (2016)         | +                     | -                                      | +                    | +                          | ?                                | -       |
| Giuli et al. (2016)           | ?                     | -                                      | -                    | -                          | +                                | -       |
| Lu et al. (2016)              | +                     | +                                      | +                    | +                          | +                                | +       |
| Prick et al. (2016)           | +                     | +                                      | +                    | +                          | +                                | +       |
| Bailey et al. (2017)          | +                     | -                                      | +                    | -                          | +                                | -       |
| Gitlin et al. (2017)          | +                     | +                                      | +                    | +                          | +                                | +       |
| Tanaka et al. (2017)          | +                     | -                                      | -                    | +                          | +                                | -       |
| Novelli et al. (2018)         | +                     | ?                                      | +                    | +                          | +                                | !       |
| Kwak et al. (2018)            | +                     | -                                      | -                    | -                          | +                                | -       |
| Joen et al. (2019)            | +                     | +                                      | +                    | +                          | +                                | +       |
| de Oliveira et al. (2019)     | ?                     | ?                                      | -                    | +                          | +                                | -       |
| O'Connor et al. (2019)        | +                     | ?                                      | +                    | +                          | +                                | !       |
| Weise et al. (2020)           | +                     | +                                      | ?                    | ?                          | +                                | !       |

 Low risk  
 Some concerns  
 High risk

Supplementary Figure 4. Risk of Bias Graph for quasi-experimental studies (N=5)

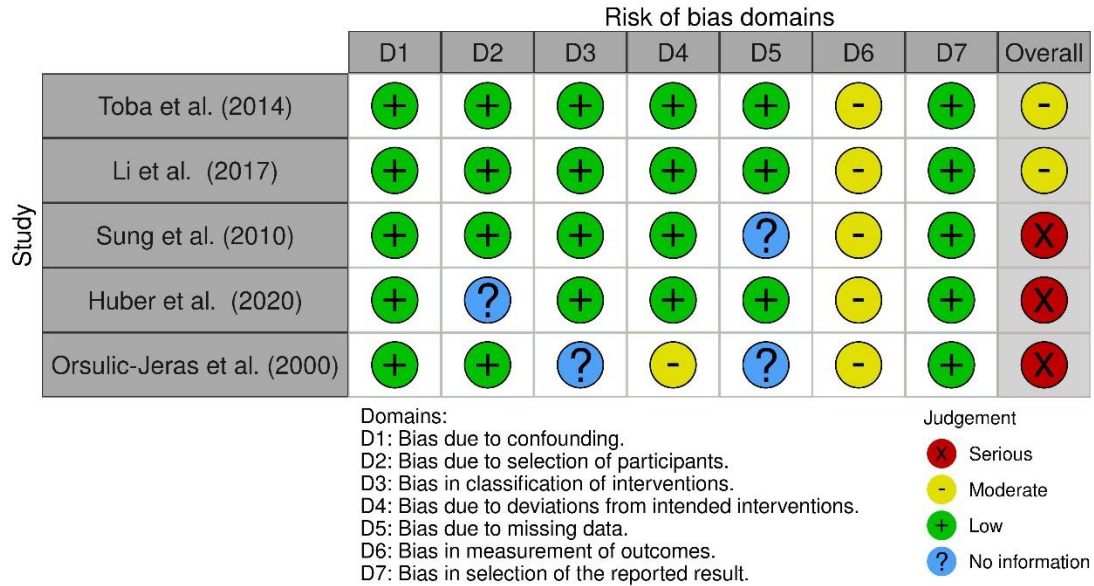

1  
2  
3  
4  
5  
6  
7  
8  
9  
10  
11  
12  
13  
14  
15  
16  
17  
18  
19  
20  
21  
22  
23  
24  
25  
26  
27  
28  
29  
30  
31  
32  
33  
34  
35  
36  
37  
38  
39  
40  
41  
42  
43  
44  
45  
46  
47

Supplementary Figure 5. Effects of tailored interventions on depression at post-intervention (N=14)

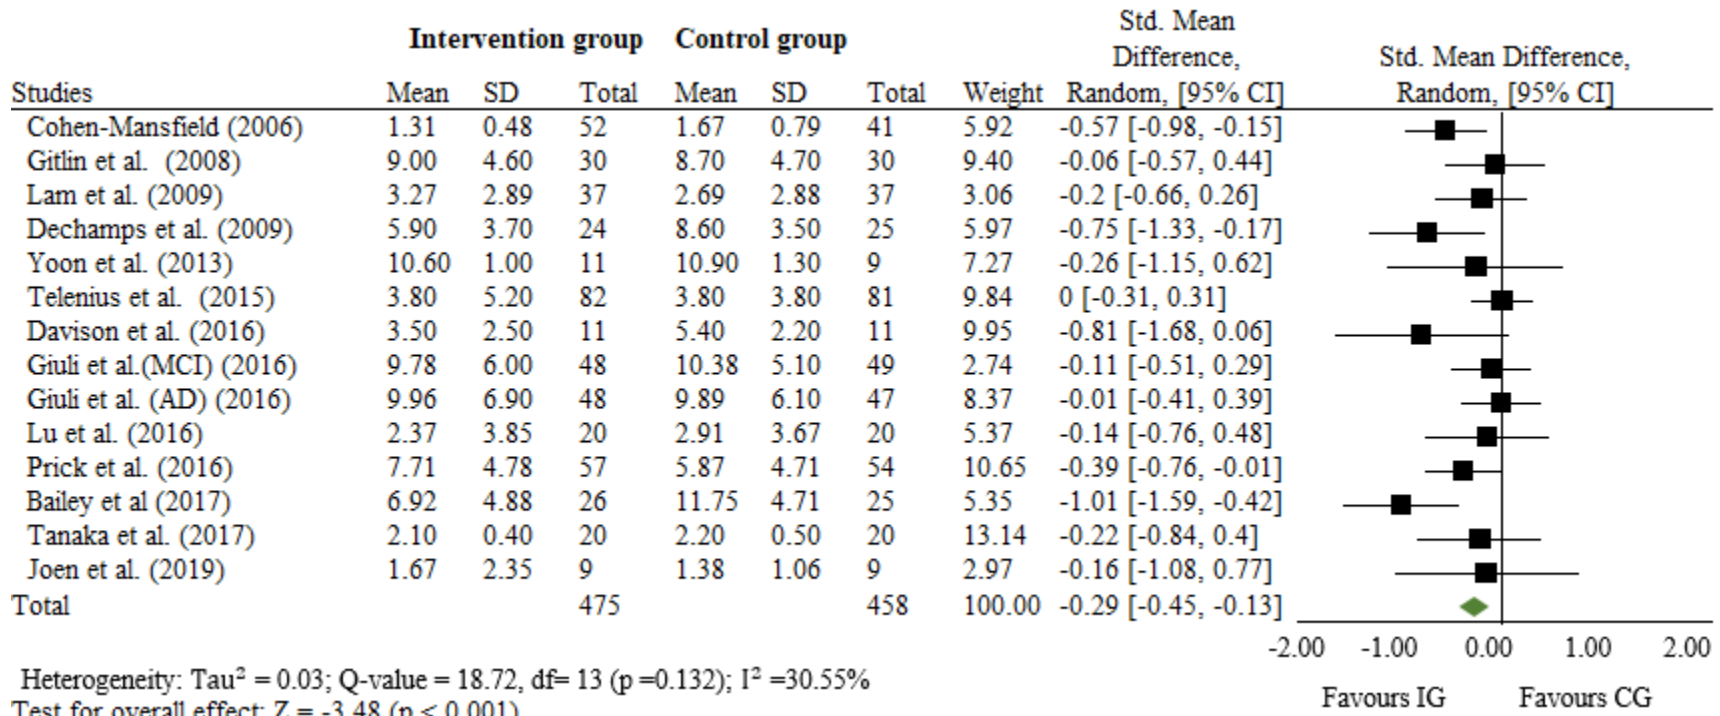

Notes: Fixed effect: SMD<sub>pooled</sub> = -0.26, 95% CI = -0.39 to -0.13, p < 0.001

Only

Supplementary Figure 6. Effects of tailored interventions on engagement at post-intervention (N =8)

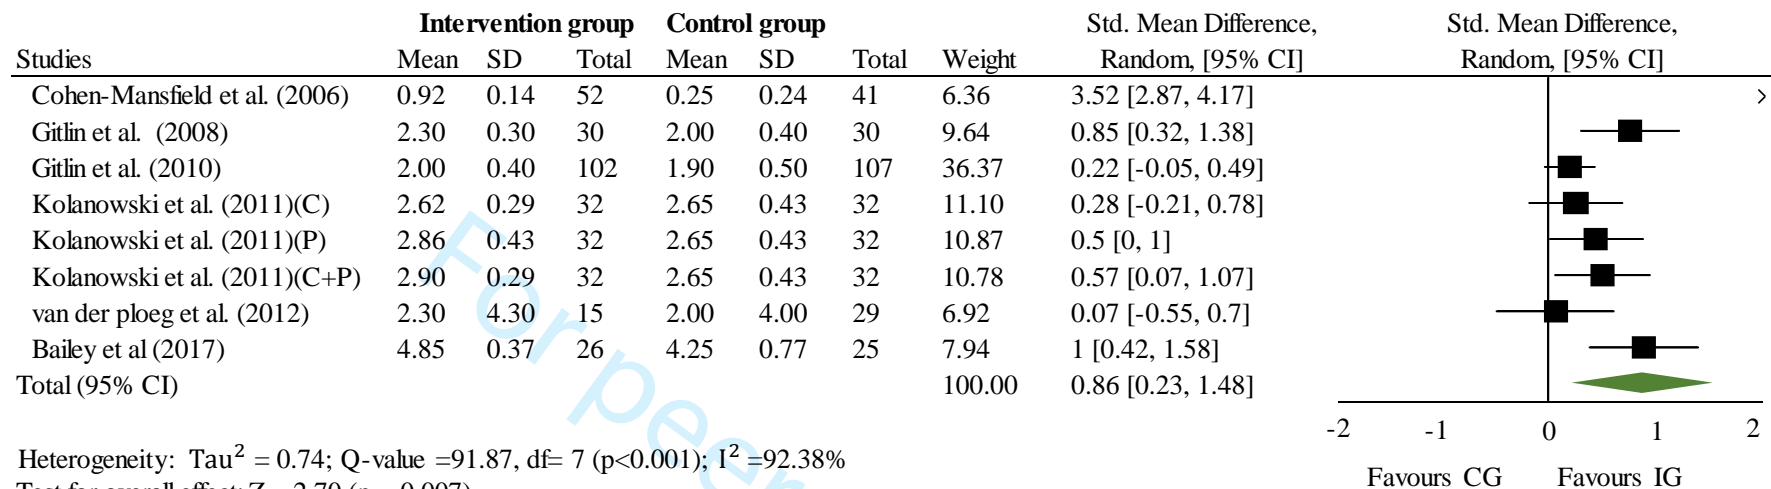

Heterogeneity:  $\tau^2 = 0.74$ ;  $Q$ -value = 91.87,  $df = 7$  ( $p < 0.001$ );  $I^2 = 92.38\%$   
 Test for overall effect:  $Z = 2.70$  ( $p = 0.007$ )

Notes: Fixed effects:  $SMD_{pooled} = 0.62$ , 95 % CI: (0.45 – 0.78),  $p < 0.001$ .

Supplementary Figure 7. Subgroup analysis: Effects of tailored interventions on depression at post-intervention by level of personalisation (N=14)

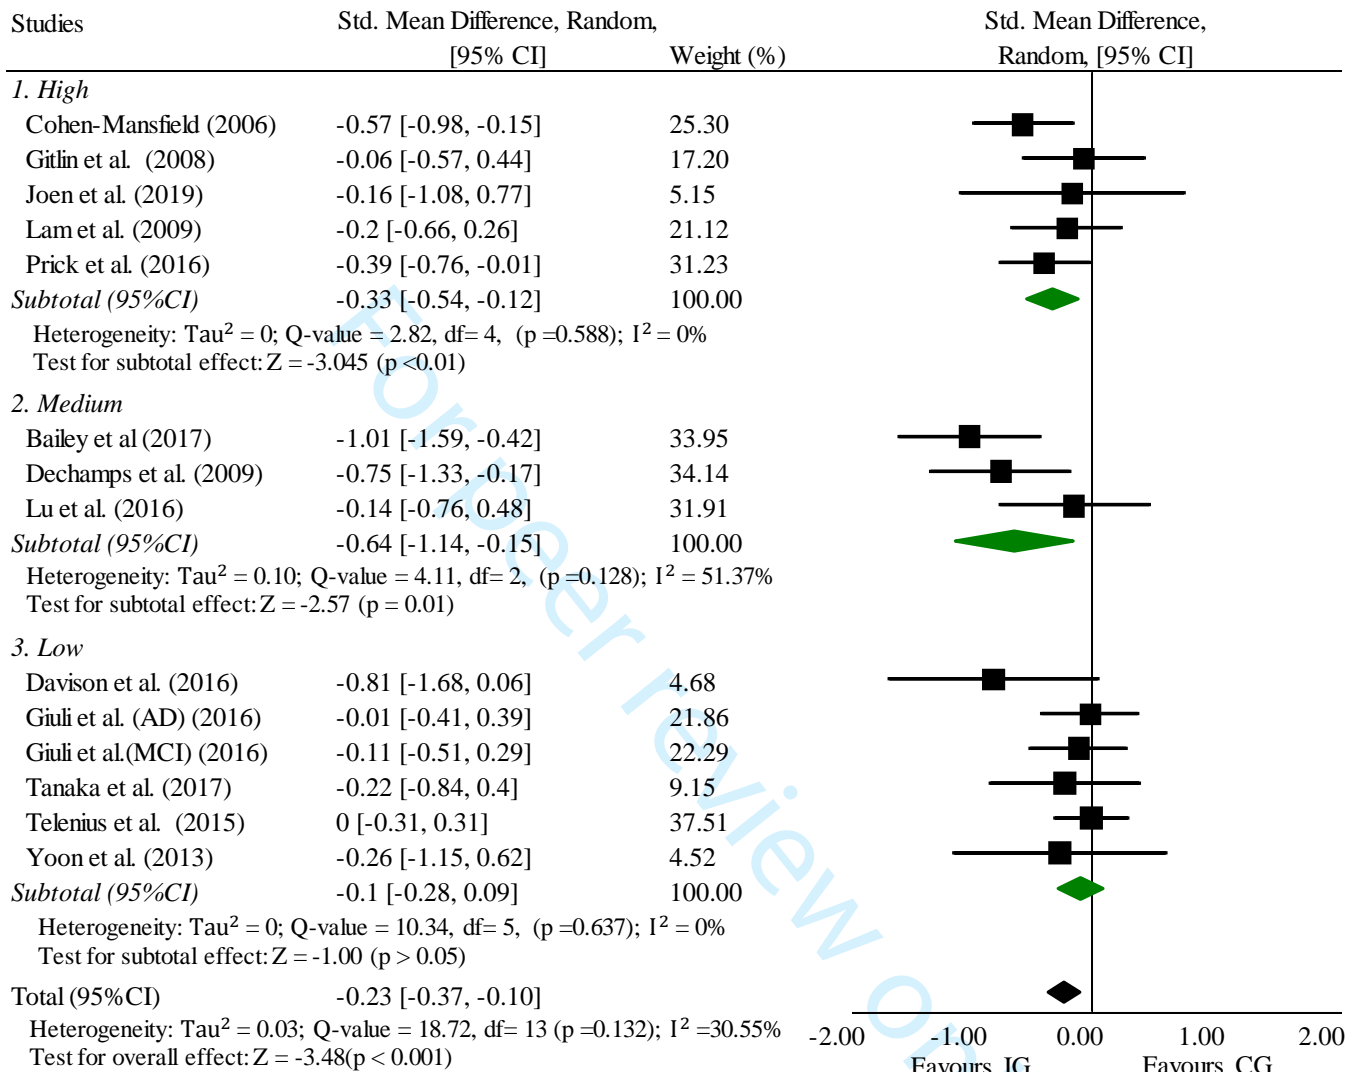

Notes: (1) High group. Fixed effect:  $\text{SMD}_{\text{pooled}} = -0.33$ , 95% CI = -0.54 to -0.12, p = 0.002; Middle group. Fixed effect:  $\text{SMD}_{\text{pooled}} = -0.65$ , 95% CI = -1.00 to -0.31, p < 0.001; Low group. Fixed effect:  $\text{SMD}_{\text{pooled}} = -0.10$ , 95% CI = -0.28 to 0.09, p = 0.316. (2) Test for the difference across three subgroups: Q-value = 8.373, df (Q) = 2, p = 0.015.

Supplementary Figure 8. Subgroup analysis: Effects of tailored interventions on engagement at post-intervention by level of personalisation (N=7)

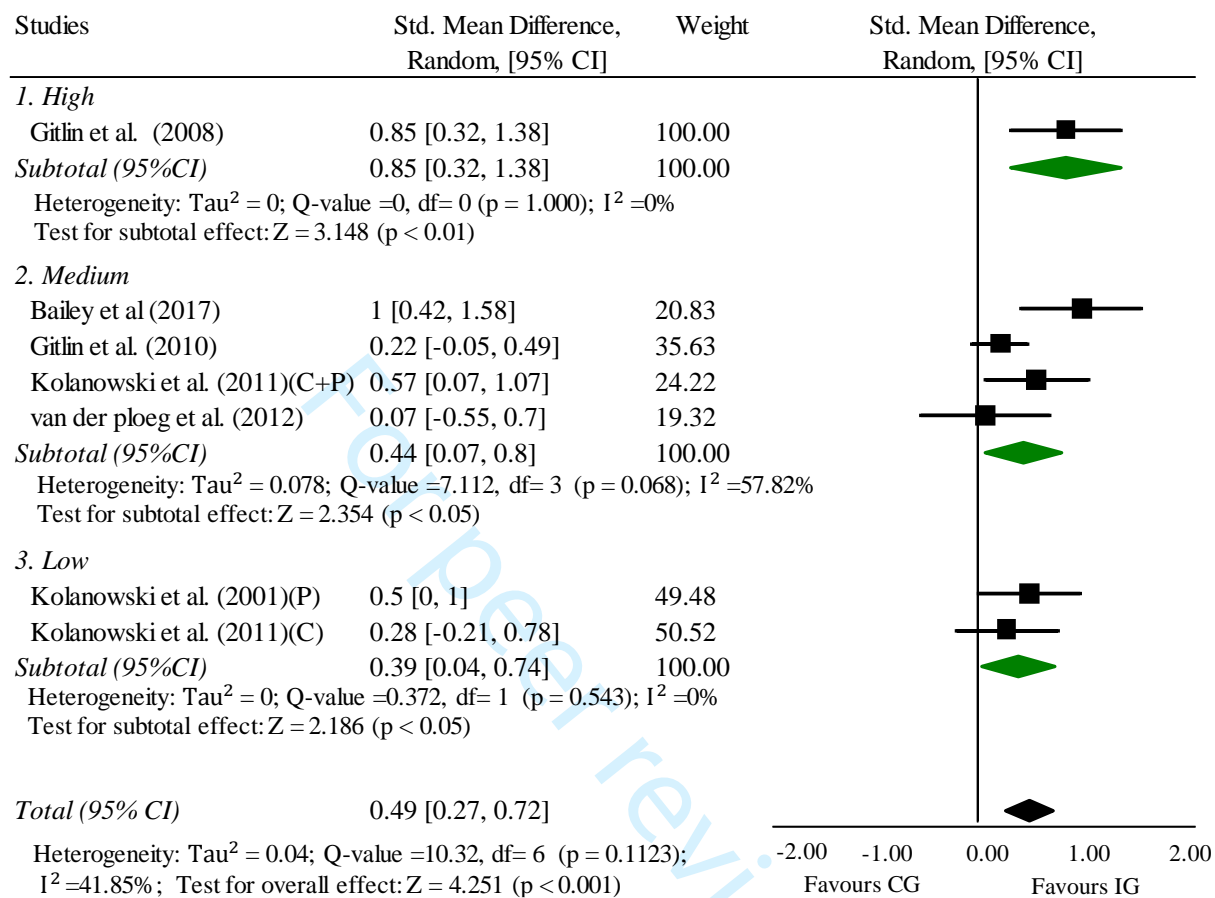

Note: (1) One study was not included in this meta-analysis based on the findings from Supplementary Figure 5 in order to reduce heterogeneity. (2) Fixed effects for three groups. High group: SMD<sub>pooled</sub> = 0.85, 95% CI = 0.32 to 1.38, p = 0.002; Middle group: SMD<sub>pooled</sub> = 0.36, 95% CI = 0.16 to 0.57, p = 0.001; Low group: SMD<sub>pooled</sub> = 0.39, 95% CI = 0.04 to 0.74, p = 0.029. (3) Test for the difference across three subgroups: Q-value = 2.836, df (Q) = 2, p = 0.242.



## Appendix 1. Data extraction form

| #  | Information                                            | Instruction                                                                                                                 |
|----|--------------------------------------------------------|-----------------------------------------------------------------------------------------------------------------------------|
| 1  | Author (Year)                                          | n/a                                                                                                                         |
| 2  | Countries                                              | n/a                                                                                                                         |
| 3  | Age, Mean(SD)                                          | n/a                                                                                                                         |
| 4  | Dementia/Cognitive impairment or mixed                 | n/a                                                                                                                         |
| 5  | Sample size [Intervention and control group)           | Separate the sample size for the intervention and control groups                                                            |
| 6  | Study design                                           | RCT/Quasi-experimental design                                                                                               |
| 7  | Study setting                                          | Home/Community/long-term care facilities, etc.                                                                              |
| 8  | Tailored for PWD characteristics                       | Capacity, interest/preferences, habits, roles, personal history, living environment, etc.                                   |
| 9  | Activity Type                                          | Physical, cognitive, musical, multiple activities                                                                           |
| 10 | Content of tailored activities/intervention            | Document the content of tailored activities in detail                                                                       |
| 11 | Delivery mode                                          | Individual, group or mixed                                                                                                  |
| 12 | Interventionist                                        | Document type of interventionist                                                                                            |
| 13 | Duration of the intervention                           | Document duration of the intervention                                                                                       |
| 14 | Comparator                                             | Control group                                                                                                               |
| 15 | Outcomes                                               | Identify reported outcome(s) of interest in the study                                                                       |
| 16 | Statistics                                             | Pre and Post Mean and SD                                                                                                    |
| 17 | Findings                                               | Summarise the findings                                                                                                      |
| 18 | Level of assessment for tailoring                      | Describe how the studies assessed participants' characteristics for the purpose of tailoring                                |
| 19 | Degree of individualization in design                  | Document the aspects of participants' characteristics targeted in the tailored activities                                   |
| 20 | Degree of person-centred care in intervention delivery | Document the extent to which interventionists had the autonomy to adjust the intervention to respond to participants' needs |

## Preferred Reporting Items for Systematic Reviews and Meta-Analyses (PRISMA) statement

| Section/topic                      | #  | Checklist item                                                                                                                                                                                                                                                                                              | Reported on page                        |
|------------------------------------|----|-------------------------------------------------------------------------------------------------------------------------------------------------------------------------------------------------------------------------------------------------------------------------------------------------------------|-----------------------------------------|
| <b>TITLE</b>                       |    |                                                                                                                                                                                                                                                                                                             |                                         |
| Title                              | 1  | Identify the report as a systematic review, meta-analysis, or both.                                                                                                                                                                                                                                         | Page 2                                  |
| <b>ABSTRACT</b>                    |    |                                                                                                                                                                                                                                                                                                             |                                         |
| Structured summary                 | 2  | Provide a structured summary including, as applicable: background; objectives; data sources; study eligibility criteria, participants, and interventions; study appraisal and synthesis methods; results; limitations; conclusions and implications of key findings; systematic review registration number. | Page 3                                  |
| <b>INTRODUCTION</b>                |    |                                                                                                                                                                                                                                                                                                             |                                         |
| Rationale                          | 3  | Describe the rationale for the review in the context of what is already known.                                                                                                                                                                                                                              | Page 4-5                                |
| Objectives                         | 4  | Provide an explicit statement of questions being addressed with reference to participants, interventions, comparisons, outcomes, and study design (PICOS).                                                                                                                                                  | Page 6                                  |
| <b>METHODS</b>                     |    |                                                                                                                                                                                                                                                                                                             |                                         |
| Protocol and registration          | 5  | Indicate if a review protocol exists, if and where it can be accessed (e.g., Web address), and, if available, provide registration information including registration number.                                                                                                                               | Page 7,<br>PROSPERO:<br>CRD42020168556. |
| Eligibility criteria               | 6  | Specify study characteristics (e.g., PICOS, length of follow-up) and report characteristics (e.g., years considered, language, publication status) used as criteria for eligibility, giving rationale.                                                                                                      | Page 6-7                                |
| Information sources                | 7  | Describe all information sources (e.g., databases with dates of coverage, contact with study authors to identify additional studies) in the search and date last searched.                                                                                                                                  | Page 7                                  |
| Search                             | 8  | Present full electronic search strategy for at least one database, including any limits used, such that it could be repeated.                                                                                                                                                                               | Page 7 &<br>Supplementary<br>Table 2.   |
| Study selection                    | 9  | State the process for selecting studies (i.e., screening, eligibility, included in systematic review, and, if applicable, included in the meta-analysis).                                                                                                                                                   | Page 7                                  |
| Data collection process            | 10 | Describe method of data extraction from reports (e.g., piloted forms, independently, in duplicate) and any processes for obtaining and confirming data from investigators.                                                                                                                                  | Page 7                                  |
| Data items                         | 11 | List and define all variables for which data were sought (e.g., PICOS, funding sources) and any assumptions and simplifications made.                                                                                                                                                                       | Page 7<br>(Appendix 1)                  |
| Risk of bias in individual studies | 12 | Describe methods used for assessing risk of bias of individual studies (including specification of whether this was done at the study or outcome level), and how this information is to be used in any data synthesis.                                                                                      | Page 10                                 |

| Section/topic                 | #  | Checklist item                                                                                                                                                                                           | Page #                               |
|-------------------------------|----|----------------------------------------------------------------------------------------------------------------------------------------------------------------------------------------------------------|--------------------------------------|
| Summary measures              | 13 | State the principal summary measures (e.g., risk ratio, difference in means).                                                                                                                            | Page 10                              |
| Synthesis of results          | 14 | Describe the methods of handling data and combining results of studies, if done, including measures of consistency (e.g., I <sup>2</sup> ) for each meta-analysis.                                       | Page 10                              |
| Risk of bias across studies   | 15 | Specify any assessment of risk of bias that may affect the cumulative evidence (e.g., publication bias, selective reporting within studies).                                                             | Page 10-11                           |
| Additional analyses           | 16 | Describe methods of additional analyses (e.g., sensitivity or subgroup analyses, meta-regression), if done, indicating which were pre-specified.                                                         | Page 10                              |
| <b>RESULTS</b>                |    |                                                                                                                                                                                                          |                                      |
| Study selection               | 17 | Give numbers of studies screened, assessed for eligibility, and included in the review, with reasons for exclusions at each stage, ideally with a flow diagram.                                          | Page 11 & Supplementary Figure 2     |
| Study characteristics         | 18 | For each study, present characteristics for which data were extracted (e.g., study size, PICOS, follow-up period) and provide the citations.                                                             | Page 11 & Supplementary table 4 & 5  |
| Risk of bias within studies   | 19 | Present data on risk of bias of each study and, if available, any outcome level assessment (see item 12).                                                                                                | Page 13 & Supplementary Figure 3 & 4 |
| Results of individual studies | 20 | For all outcomes considered (benefits or harms), present, for each study: (a) simple summary data for each intervention group (b) effect estimates and confidence intervals, ideally with a forest plot. | Page 14-16<br>Supplementary table 5  |
| Synthesis of results          | 21 | Present results of each meta-analysis done, including confidence intervals and measures of consistency.                                                                                                  | Page 14-16                           |
| Risk of bias across studies   | 22 | Present results of any assessment of risk of bias across studies (see Item 15).                                                                                                                          | Page 12                              |
| Additional analysis           | 23 | Give results of additional analyses, if done (e.g., sensitivity or subgroup analyses, meta-regression [see Item 16]).                                                                                    | Page 15-16                           |
| <b>DISCUSSION</b>             |    |                                                                                                                                                                                                          |                                      |
| Summary of evidence           | 24 | Summarize the main findings including the strength of evidence for each main outcome; consider their relevance to key groups (e.g., healthcare providers, users, and policy makers).                     | Page 17-19                           |
| Limitations                   | 25 | Discuss limitations at study and outcome level (e.g., risk of bias), and at review-level (e.g., incomplete retrieval of identified research, reporting bias).                                            | Page 19                              |
| Conclusions                   | 26 | Provide a general interpretation of the results in the context of other evidence, and implications for future research.                                                                                  | Page 19-20                           |
| <b>FUNDING</b>                |    |                                                                                                                                                                                                          |                                      |
| Funding                       | 27 | Describe sources of funding for the systematic review and other support (e.g., supply of data); role of funders for the systematic review.                                                               | Page 21                              |

From: Moher D, Liberati A, Tetzlaff J, Altman DG, The PRISMA Group (2009). Preferred Reporting Items for Systematic Reviews and Meta-Analyses: The PRISMA Statement. PLoS Med 6(7): e1000097. doi:10.1371/journal.pmed1000097
