# Supplementary material for: Degree of personalisation in tailored activities and its effect on behavioural and psychological symptoms and quality of life among people with dementia: a systematic review and meta-analysis
Source: PubMed Central journal article supplement — BMJ Open. 2021 Nov 29;11(11):e048917. doi: 10.1136/bmjopen-2021-048917 (PMC8634002; doi:10.1136/bmjopen-2021-048917), 2021-11-29
Supplement: bmjopen-2021-048917supp001.pdf [file bmjopen-2021-048917supp001.pdf]

Lu et al. (2021).

Online Supplemental Material for

*Degree of personalisation in tailored activities and its effect on behavioural and psychological symptoms and quality of life among people with dementia: A systematic review and meta-analysis*

Citation (APA 7<sup>th</sup>)

Lu, S., Zhang, A. Y., Liu, T., Choy, J. C. P., Ma, M. S., Wong, G., & Lum, T. (2021). Degree of personalisation in tailored activities and its effect on behavioural and psychological symptoms and quality of life among people with dementia: a systematic review and meta-analysis. *BMJ Open*, 0(e048917), 1-15. <https://doi.org/10.1136/bmjopen-2021-048917>

Lu et al. (2021).

Supplementary Table 1. Summary of existing reviews on tailored activities for people with dementia/cognitive impairment

| Author (Year)          | Study aim                                                                                                                        | Range of Years & # of studies included | Study Design                                                                                          | Targeted Group                | Settings                      | Targeted Outcomes                                                                                                 | Main Findings                                                                                                                                                                                                                                                                                                                       |
|------------------------|----------------------------------------------------------------------------------------------------------------------------------|----------------------------------------|-------------------------------------------------------------------------------------------------------|-------------------------------|-------------------------------|-------------------------------------------------------------------------------------------------------------------|-------------------------------------------------------------------------------------------------------------------------------------------------------------------------------------------------------------------------------------------------------------------------------------------------------------------------------------|
| 1.Trahan et al. (2014) | To identify different ways of engaging persons living with dementia effectively to enhance their quality of life and reduce BPSD | 2000-2011 (N=28)                       | RCT, crossover, single-subject, etc.                                                                  | Older adults aged 60 or above | Community or residential care | Patient engagement, behavioural disturbance, psychological symptoms, another patient-oriented behavioural outcome | Compared with the consistent effect of changes to space and social demands on engagement and BPSD, changes to objects are more common but the impact is mixed.                                                                                                                                                                      |
| 2.Testad et al. (2014) | To review the benefits of personalised psychosocial interventions for BPSD                                                       | 2000-2012 (N=40)                       | RCT, quasi-experimental design                                                                        | People with dementia          | Care home and nursing home    | Depression, anxiety, agitation, and psychotic symptoms                                                            | Pleasant activities with or without social interactions and reminiscence therapy showed strong effect on reducing agitation and improving mood respectively. The tailoring of care package according to the symptoms a person is experiencing is probably one of the explanations for the differential effects of the interventions |
| 3.Travers et al (2016) | To review the effectiveness of meaningful occupational interventions on persons living with dementia                             | 2004-2015 (N=34)                       | RCT, quasi-experimental design, pre-post-test design, cohort study, case study, cross-sectional study | People with dementia          | Nursing home                  | Depression, anxiety, agitation, wandering, apathy, quality of life, mood, function, cognition, sleep              | Individualised activities/recreational interventions work well on a range of BPSD; preferred music shows effectiveness on agitation, depression and anxiety.                                                                                                                                                                        |

Lu et al. (2021).

Supplementary Table 1 (Continued). Summary of existing reviews on tailored activities for people with dementia/cognitive impairment

| Author (Year)         | Study aim                                                                                                                                    | Range of Years & # of studies included | Study Design                   | Targeted Group                        | Settings                  | Targeted Outcomes                                                        | Main Findings                                                                                                                                                                                                                                                        |
|-----------------------|----------------------------------------------------------------------------------------------------------------------------------------------|----------------------------------------|--------------------------------|---------------------------------------|---------------------------|--------------------------------------------------------------------------|----------------------------------------------------------------------------------------------------------------------------------------------------------------------------------------------------------------------------------------------------------------------|
| 4.Möhler et al (2018) | To assess the effects of personally tailored activities on psychosocial outcomes of persons living with dementia in long-term care           | Up to 2017 (N=7)                       | RCT, quasi-experimental design | People with dementia                  | Long-term care facilities | Challenging behaviours, quality of life                                  | As the effect of personally tailored activities on challenging behaviours of persons living with dementia is slight, recommendations on how to modify the factors (e.g., delivery, duration, frequency) for enhancing the intervention effectiveness cannot be made. |
| 5.Möhler et al (2020) | To assess the effects of activities tailored to personal interests on psychosocial outcomes of persons living with dementia in the community | Up to 2019 (N=5)                       | RCT, quasi-experimental design | People with mild to moderate dementia | Community or home         | Challenging behaviours, quality of life                                  | Personally tailored activities may improve challenging behaviours and quality of life but have no effect on depression, affect, passivity, and engagement.                                                                                                           |
| 6.Möhler et al (2020) | To assess the effects of offering people with dementia living in their own homes activities tailored to their personal interests.            | Up to 2019 (N=5)                       | RCT                            | People with dementia                  | Home only                 | challenging behaviour, quality of life, depression, and engagement, etc. | Personally tailored activities may improve challenging behaviour and slightly improve quality of life of people with dementia living in their own homes, but may have little or no effect on depression and engagement                                               |

Note: The full references for six reviews summarized in this table can be found in the Reference section #7-12.

Lu et al. (2021).

Supplementary Table 2. Full search strategy

| Database                                                                                                                                          | Search strategy                                                                                                                                                                                                                                                                                                                                                                                                                                                                                                                                                                 |
|---------------------------------------------------------------------------------------------------------------------------------------------------|---------------------------------------------------------------------------------------------------------------------------------------------------------------------------------------------------------------------------------------------------------------------------------------------------------------------------------------------------------------------------------------------------------------------------------------------------------------------------------------------------------------------------------------------------------------------------------|
| <b>ProQuest</b> (APA PsycArticles, APA PsycInfo, Applied Social Sciences Index & Abstracts, Sociological Abstracts, Medical Database, PAIS Index) | ab("Cognitive impairment" OR "cognitive disorder" OR "dementia" OR "Alzheimer") AND ab("tailor*" OR "engage*" OR "individualized" OR "individual-centered" OR "personalized" OR "personalized" OR "person-centered") AND ab("activities" OR "program" OR "therapy" OR "intervention" OR "treatment*")                                                                                                                                                                                                                                                                           |
| <b>Web of Science</b>                                                                                                                             | TS=("Cognitive impairment" OR "cognitive disorder" OR "dementia" OR "Alzheimer" ) AND TS=("tailor*" OR "engage*" OR "individualized" OR "individual-centered" OR "personalized" OR "personalized" OR "person-centered") AND TS=("activities" OR "program*" OR "therapy" OR "intervention" OR "treatment")                                                                                                                                                                                                                                                                       |
| <b>PubMed</b>                                                                                                                                     | ((("Cognitive impairment"[Title/Abstract] OR "cognitive disorder"[Title/Abstract] OR "dementia"[Title/Abstract] OR "Alzheimer"[Title/Abstract])) AND ("tailor*" [Title/Abstract] OR "engage*" [Title/Abstract] OR "individualized" [Title/Abstract] OR "individual-centered" [Title/Abstract] OR "personalized" [Title/Abstract] OR "personalized" [Title/Abstract] OR "person-centered" [Title/Abstract])) AND ("activities" [Title/Abstract] OR "program*" [Title/Abstract] OR "therapy" [Title/Abstract] OR "intervention" [Title/Abstract] OR "treatment" [Title/Abstract]) |
| <b>Ovid</b> (Global health, Embase, Social Work abstract)                                                                                         | [Title and abstract search] (Cognitive impairment OR cognitive disorder OR dementia OR Alzheimer) AND ("tailor*" OR "engage*" OR "individualized" OR "individual-centered" OR "personalized" OR "person-centered") AND ("activities" OR "program" OR "therapy" OR "intervention" OR "treatment*")                                                                                                                                                                                                                                                                               |
| <b>Cochrane Library</b>                                                                                                                           | [Title and abstract search] (Cognitive impairment OR cognitive disorder OR dementia OR Alzheimer) AND ("tailor*" OR "engage*" OR "individualized" OR "individual-centered" OR "personalized" OR "person-centered") AND ("activities" OR "program" OR "therapy" OR "intervention" OR "treatment*")                                                                                                                                                                                                                                                                               |
| <b>Cumulative Index to Nursing and Allied Health Literature (CINAHL)</b>                                                                          | [Title and abstract search] (Cognitive impairment OR cognitive disorder OR dementia OR Alzheimer) AND ("tailor*" OR "engage*" OR "individualized" OR "individual-centered" OR "personalized" OR "person-centered") AND ("activities" OR "program" OR "therapy" OR "intervention" OR "treatment*")                                                                                                                                                                                                                                                                               |

Note: No limit on the publication date

Lu et al. (2021).

Supplementary Table 3. Rating scheme for assessing the degree of personalisation in tailored activities

| Level         | Criteria                                                                                                                                                                                                                                                                                                                                                                                                                                                                                                                                                                                                                                                                                        |
|---------------|-------------------------------------------------------------------------------------------------------------------------------------------------------------------------------------------------------------------------------------------------------------------------------------------------------------------------------------------------------------------------------------------------------------------------------------------------------------------------------------------------------------------------------------------------------------------------------------------------------------------------------------------------------------------------------------------------|
| <b>Low</b>    | <ul style="list-style-type: none"> <li>• <b>Unclear/incomprehensive:</b> No pre-assessment / Pre-assessments were not clearly described / Pre-assessments on one PWD characteristic only, without describing how the assessment results were utilised to inform the tailored activities design;</li> <li>• Activity design targeted <b>only one domain</b> of tailoring as listed below, including capabilities, preferences, interests, life experience, and living environment;</li> <li>• Interventionists had <b>low flexibility and only minimal/marginal modifications</b> were allowed.</li> </ul>                                                                                       |
| <b>Middle</b> | <ul style="list-style-type: none"> <li>• <b>Semi-structured:</b> Pre-assessments were conducted by unstructured or semi-structured interviews, with some description on how the assessment results were utilised to inform the tailored activities design;</li> <li>• Activity design targeted <b>two or more domains</b> of tailoring systematically as listed below, including capabilities, preferences, interests, life experience, and external environment;</li> <li>• Interventionists had <b>some flexibility and some modifications</b> could be made based on their clinical knowledge and observation to accommodate the spontaneous needs of PWD during the intervention</li> </ul> |
| <b>High</b>   | <ul style="list-style-type: none"> <li>• <b>Structured:</b> Pre-assessments were conducted by structured interviews, with clear and detailed description on how the assessment results were utilised to systematically inform the tailored activities design;</li> <li>• Activity design targeted <b>two or more domains</b> of tailoring systematically as listed below, including capabilities, preferences, interests, life experience, and external environment;</li> <li>• Interventionists had <b>high flexibility and any modifications</b> based on their clinical knowledge and observation to accommodate the spontaneous needs of PWD during the intervention.</li> </ul>            |

Lu et al. (2021).

Supplementary Table 4. Characteristics of included studies

| #  | Author (Year)<br>[Countries]              | Age<br>Mean(SD)                  | Dementia<br>types/stage                | Sample<br>size    | Study<br>design  | Study setting                       |
|----|-------------------------------------------|----------------------------------|----------------------------------------|-------------------|------------------|-------------------------------------|
| 1  | Orsulic-Jeras et al. (2000) [USA]         | I: 88 (4.3)<br>C: 88 (4.3)       | Dementia                               | I: 16;<br>C: 16   | Quasi-experiment | LTC facility                        |
| 2  | Cohen-Mansfield (2006) [USA]              | I: 87.2 (6.6)<br>C: 87.3 (7.1)   | Dementia                               | I: 52;<br>C: 41   | RCT              | LTC facility and adult day centres  |
| 3  | Garland et al. (2007) [Australia]         | I: 79.0 (66-93)<br>C: 79 (66-93) | Dementia                               | I: 10;<br>C: 10   | RCT              | LTC facility                        |
| 4  | Cohen-Mansfield (2007) [USA]              | I: 88 (6.4)<br>C: 85 (8.6)       | Dementia                               | I: 89;<br>C: 78   | RCT              | LTC facility                        |
| 5  | Gitlin et al. (2008) [USA]                | I: 78 (9.2)<br>C: 80.8 (9.5)     | Dementia                               | I: 30;<br>C: 30   | RCT              | Home                                |
| 6  | Dechamps et al. (2009) [France]           | I: 83.2 (8.3)<br>C: 83.2 (8.3)   | Dementia                               | I: 24;<br>C: 25   | RCT              | Hospital                            |
| 7  | Gitlin et al. (2010) [USA]                | I: 83.1 (7.8)<br>C: 81.8 (9.9)   | Dementia                               | I: 102;<br>C: 107 | RCT              | Community                           |
| 8  | Lam et al. (2010) [Hong Kong]             | I: 83.1 (6.9)<br>C: 83.8 (7)     | Dementia                               | I: 37;<br>C: 37   | RCT              | LTC facility                        |
| 9  | Sung et al. (2010) [Taiwan]               | I: 78.1 (7.2)<br>C: 82.7 (7.4)   | Dementia                               | I: 29;<br>C: 23   | Quasi-experiment | LTC facility                        |
| 10 | Kolanowski et al. (2011) [USA]            | I: 86 (7.1)<br>C: 85.9 (4.9)     | Dementia                               | I: 31;<br>C: 32   | RCT              | LTC facility                        |
| 11 | Lin et al. (2011) [Taiwan]                | I: 81.5 (7.3)<br>C: 82.2 (6.3)   | Dementia                               | I: 49;<br>C: 51   | RCT              | LTC facility                        |
| 12 | Cohen-Mansfield et al. (2012) [USA]       | I: 85.9 (8.6)<br>C: 85.3 (9.6)   | Dementia                               | I: 89;<br>C: 36   | RCT              | LTC facility                        |
| 13 | van der Ploeg et al. (2012) [Australia]   | I: 78.1 (9.8)<br>C: 78.1 (9.8)   | Dementia                               | I: 15;<br>C: 29   | Crossover RCT    | LTC facility                        |
| 14 | Ridder et al. (2013) [Denmark and Norway] | I: 82.2 (8.8)<br>C: 80.2 (8.7)   | Dementia                               | I: 20;<br>C: 21   | RCT              | LTC facility                        |
| 15 | Sakamoto et al. (2013) [Japan]            | I: 80.4 (7.4)<br>C: 81.5 (7.9)   | Dementia                               | I: 13;<br>C: 13   | RCT              | Hospital                            |
| 16 | Van Haitsma et al. (2013) [USA]           | I: 87.7 (8.7)<br>C: 89.2 (6.9)   | Dementia                               | I: 44;<br>C: 93   | RCT              | LTC facility                        |
| 17 | Yoon et al. (2013) [Korea]                | I: 77.9 (7.5)<br>C: 70.1 (12.2)  | Dementia                               | I: 11;<br>C: 9    | RCT              | LTC facility                        |
| 18 | Toba et al. (2014) [Japan]                | I: 84.1 (7.1)<br>C: 87.3 (7.1)   | Dementia                               | I: 158;<br>C: 54  | Quasi-experiment | Geriatric health service facilities |
| 19 | Holthoff et al. (2015) [Germany]          | I: 72.4 (4.3)<br>C: 70.7 (5.4)   | Early and moderate stage AD            | I: 15;<br>C: 15   | RCT              | Home                                |
| 20 | Telenius et al. (2015) [Norway]           | I: 86.9 (7)<br>C: 86.4 (7.8)     | Mild or moderate dementia              | I: 82;<br>C: 81   | RCT              | LTC facility                        |
| 21 | Davison et al. (2016) [Australia]         | I: 86 (5.2)<br>C: 86 (5.2)       | Dementia                               | I: 11;<br>C: 11   | RCT              | LTC facility                        |
| 22 | Giuli et al. (2016) [Italy]               | I: 76 (6.3)<br>C: 76.5 (5.7)     | Mild cognitive impairment/<br>Dementia | I: 48;<br>C: 49   | RCT              | Hospital                            |
| 23 | Lu et al. (2016) [USA]                    | I: 71.2 (0.8)<br>C: 76.5 (7.1)   | Mild cognitive impairment              | I: 20;<br>C: 20   | RCT              | Community                           |

Notes: I = Intervention group; C = control group; RCT = randomized clinical trial; LTC = long-term care

Lu et al. (2021).

Supplementary Table 4. (Continued) Characteristics of included studies

| #  | Author (Year)<br>[Countries]          | Age<br>Mean(SD)                | Dementia<br>types/stage                  | Sample<br>size  | Study<br>design      | Study setting                        |
|----|---------------------------------------|--------------------------------|------------------------------------------|-----------------|----------------------|--------------------------------------|
| 24 | Prick et al. (2016)<br>[Netherlands]  | I: 76 (7.6)<br>C: 78 (7.2)     | Dementia                                 | I: 57;<br>C: 54 | RCT                  | Home                                 |
| 25 | Bailey et al (2017)<br>[USA]          | I: 84.4 (7.7)<br>C: 83.9 (9.2) | Mild to moderate<br>cognitive impairment | I: 26;<br>C: 25 | RCT                  | LTC facility                         |
| 26 | Li et al. (2017)<br>[China]           | I: 83.1 (4.1)<br>C: 81.1 (6.7) | Dementia                                 | I: 19;<br>C: 21 | Quasi-<br>experiment | LTC facility                         |
| 27 | Gitlin et al. (2017)<br>[USA]         | I: 80.4 (8.7)<br>C: 80.4 (8.7) | Dementia                                 | I: 51;<br>C: 60 | RCT                  | Home                                 |
| 28 | Tanaka et al. (2017)<br>[Japan]       | I: 86 (7.4)<br>C: 86.5 (8.3)   | Dementia                                 | I: 20;<br>C: 20 | RCT                  | Geriatric health<br>service facility |
| 29 | Novelli et al. (2018)<br>[Brazil]     | I: 79.4 (7.7)<br>C: 83.5 (7.1) | Dementia                                 | I: 15;<br>C: 15 | RCT                  | Community                            |
| 30 | Kwak et al. (2018)<br>[USA]           | I: 88.9 (5.4)<br>C: 84.9 (8.6) | Dementia or<br>Alzheimer's disease       | I: 30;<br>C: 29 | Crossover<br>RCT     | LTC facility                         |
| 31 | Jeon et al. (2020)<br>[Australia]     | I: 79.0 (N.A)<br>C: 81.0 (N.A) | Mild cognitive<br>impairment/Dementia    | I: 9;<br>C: 9   | RCT                  | Home                                 |
| 32 | de Oliveira et al.<br>(2019) [Brazil] | I: 79 (5.7)<br>C: 78.4 (6.2)   | Dementia                                 | I: 11;<br>C: 10 | RCT                  | Community<br>medical centers         |
| 33 | O'Connor et al.<br>(2019) [Australia] | I: 62.1 (N.A)<br>C: 65.6 (N.A) | Dementia                                 | I: 9;<br>C: 11  | RCT                  | Home                                 |
| 34 | Weise et al. (2020)<br>[Germany]      | I: 85.1 (5.9)<br>C: 85.1 (5.9) | Moderate or severe<br>stages of Dementia | I: 10;<br>C: 10 | RCT                  | LTC facility                         |
| 35 | Huber et al. (2020)<br>[Switzerland]  | I: 74-92<br>C: 74-92           | Moderate to severe<br>stages of dementia | I: 10;<br>C: 13 | Quasi-<br>experiment | Community                            |

Notes: I = Intervention group; C = control group; RCT = randomized clinical trial; LTC = long-term care

Lu et al. (2021).

Supplementary Table 5. Interventions and activities tailored for participants' characteristics

| # | Author (Year)               | PWD characteristics                                                                                                                  | Types | Content of tailored activities/intervention                                                                                                                                                                                                                                                                                                                                                     | Delivery                                                                                                       | Comparator | Outcomes                                                 | Findings                                                                                |
|---|-----------------------------|--------------------------------------------------------------------------------------------------------------------------------------|-------|-------------------------------------------------------------------------------------------------------------------------------------------------------------------------------------------------------------------------------------------------------------------------------------------------------------------------------------------------------------------------------------------------|----------------------------------------------------------------------------------------------------------------|------------|----------------------------------------------------------|-----------------------------------------------------------------------------------------|
| 1 | Orsulic-Jeras et al. (2000) | Preserved abilities                                                                                                                  | MP    | Montessori-Based Activities included individual-based and group activities. In individual activities, various aesthetically pleasing materials taken from the everyday environment were used. Group activities included memory bingo and group sorting.                                                                                                                                         | Mode: Mixed; Interventionist: Research assistant/activities therapist; Duration: 3 months. Follow-up: 6 months | usual care | Level of engagement                                      | IG showed more engagement than CG at post-intervention.                                 |
| 2 | Cohen-Mansfield (2006)      | Saliency of identity roles, the severity of the dementia, ability                                                                    | MP    | Role-identity-based treatment involved a 2-step procedure, including the determination of role-identity saliency and the determination of the intervention. Chosen activities were tailored for the roles identified. For example, a participant with a great sense of professional accomplishment enjoyed looking at his awards.                                                               | Mode: Individual; Interventionist: Research assistants; Duration: 5 days.                                      | usual care | BPSD (Agitation), Engagement and Depression.             | IG showed increased engagement and fewer BPSD in the treatment than CG.                 |
| 3 | Garland et al. (2007)       | Preferred songs, performers and titles.                                                                                              | MU    | Preferred music selected based on family members' reports of participants' preference.                                                                                                                                                                                                                                                                                                          | Mode: Individual; Interventionist: Researcher; Duration: 4 weeks.                                              | usual care | BPSD (Overall)                                           | No significant difference in reducing BPSD between IG and CG.                           |
| 4 | Cohen-Mansfield (2007)      | Ability, past history and preference                                                                                                 | MP    | Non-pharmacologic individualised interventions based on TREA framework                                                                                                                                                                                                                                                                                                                          | Mode: Mixed; Interventionist: Research assistants; Duration: 10 days. No follow-up assessment.                 | placebo    | BPSD                                                     | IG showed decreases in overall BPSD compared to CG at post-intervention.                |
| 5 | Gitlin et al. (2008)        | Capabilities, previous roles, habits and interests                                                                                   | MP    | TAP is based on the environmental vulnerability/reduced stress-threshold model, including a three-stage intervention: (1) structural assessments, (2) activity prescriptions, chosen activities tailored to match PWD characteristics, providing training to and working with caregivers in the implementation, and (3) helping caregivers to generalise strategies for future care challenges. | Mode: Individual; Interventionist: Occupational therapists and caregivers; Duration: 4 months.                 | wait-list  | BPSD (overall), QoL, depression, and level of engagement | IG showed greater reduction in frequency of BPSD and greater engagement than CG.        |
| 6 | Dechamps et al. (2009)      | Abilities and discourse                                                                                                              | MP    | The Cognition-Action method does not rely on the use of a specific exercise, but rather is a guidance method intended to enhance active living and social interaction using motor actions as incentives.                                                                                                                                                                                        | Mode: Individual; Interventionist: Research assistants; Duration: 12 weeks.                                    | usual care | BPSD (Overall), QoL, and depression                      | IG showed greater reduction in BPSD, depression and improvement in QoL compared to CG.  |
| 7 | Gitlin et al. (2010)        | Home environment, Caregiver-identified concerns and patient capabilities, routines, previous and current roles, habits and interests | MP    | Care of Persons with Dementia in their Environments (COPE) targeted modifiable environmental stressors to decrease sensory, physical, and cognitive demands, align with patient capabilities, and re-engage patients in daily activities.                                                                                                                                                       | Mode: Individual; Interventionist: Occupational therapists; Duration: 4 months. Follow-up: 9 months            | usual care | BPSD, QoL and engagement                                 | IG showed increases in the level of engagement compared to the CG at post-intervention. |



Lu et al. (2021).

Supplementary Table 5. (Continued) Interventions and activities tailored for participants' characteristics

| #  | Author (Year)                 | PWD characteristics                             | Types | Content of tailored activities/intervention                                                                                                                                                                                                                                                                                                                         | Delivery                                                                                            | Comparator        | Outcomes                        | Findings                                                                       |
|----|-------------------------------|-------------------------------------------------|-------|---------------------------------------------------------------------------------------------------------------------------------------------------------------------------------------------------------------------------------------------------------------------------------------------------------------------------------------------------------------------|-----------------------------------------------------------------------------------------------------|-------------------|---------------------------------|--------------------------------------------------------------------------------|
| 8  | Lam et al. (2010)             | Abilities, preference, needs                    | P     | Individualised functional training programme                                                                                                                                                                                                                                                                                                                        | Mode: Individual; Interventionist: Occupational therapists; Duration: 8 weeks. Follow-up: 4 months  | Attention control | BPSD (Depression) and cognition | IG showed reduction in depression compared to CG only at 4-month follow up.    |
| 9  | Sung et al. (2010)            | Music preference                                | MU    | Preferred music listening intervention                                                                                                                                                                                                                                                                                                                              | Mode: Individual; Interventionist: Trained nursing staff; Duration: 6 weeks.                        | usual care        | BPSD (Depression/Anxiety)       | IG had a lower anxiety score compared with CG.                                 |
| 10 | Kolanowski et al. (2011)      | Functional level, personality style of interest | MP    | Activities derived from the Need driven Dementia-compromised Behavior model tailored to the resident's functional level (cognitive and physical) and personality style of interest<br>3-arm intervention group design:<br>(1) Personality style of interest group (PI); (2) Functional level (FL); (3) PI + FL                                                      | Mode: Group ; Interventionist: Nursing staff; Duration: 3 weeks                                     | Active control    | BPSD (Agitation) and Engagement | IG (PI) showed greater engagement than the other groups.                       |
| 11 | Lin et al. (2011)             | Music Preference                                | MU    | Group music intervention                                                                                                                                                                                                                                                                                                                                            | Mode: Group; Interventionist: Researcher; Duration: 6 weeks. One-month follow up.                   | usual care        | BPSD (Agitation)                | IG showed reduction in BPSD compared to CG at post-intervention and follow-up. |
| 12 | Cohen-Mansfield et al. (2012) | Past identity, ability and preferences          | MP    | The TREA decision tree protocol was used to identify the possible reasons for agitated behaviour, needs, and preferences of participants. The activities included simulated animal-assisted therapy, one-on-one interaction, simulated interaction, group activities, arts and crafts, physical activities, games and music based on participants' preferences etc. | Mode: Mixed; Interventionist: Research assistants; Duration: 2 weeks.                               | placebo           | BPSD (Agitation)                | IG showed reduction in total agitation compared to CG.                         |
| 13 | van der Ploeg et al. (2012)   | preserved abilities and Interest                | MP    | Montessori-based activities                                                                                                                                                                                                                                                                                                                                         | Mode: Mixed; Interventionist: Psychologists and higher degree psychology student; Duration: 4 weeks | usual care        | BPSD, engagement                | IG showed more engagement than CG.                                             |
| 14 | Ridder et al. (2013)          | life-story/history                              | MU    | Individual music therapy                                                                                                                                                                                                                                                                                                                                            | Mode: Individual; Interventionist: Clinicians; Duration: 6 weeks. Follow-up: 7 weeks.               | usual care        | BPSD (Agitation), QoL           | IG showed reduction in total agitation compared to CG at post-intervention.    |

Lu et al. (2021).

Supplementary Table 5. (Continued) Interventions and activities tailored for participants' characteristics

| #  | Author (Year)             | PWD characteristics  | Types | Content of tailored activities/intervention                                                                                                                                                                                                 | Delivery                                                                                              | Comparator        | Outcomes                              | Findings                                                                                                                                                  |
|----|---------------------------|----------------------|-------|---------------------------------------------------------------------------------------------------------------------------------------------------------------------------------------------------------------------------------------------|-------------------------------------------------------------------------------------------------------|-------------------|---------------------------------------|-----------------------------------------------------------------------------------------------------------------------------------------------------------|
| 15 | Sakamoto et al. (2013)    | Music preference     | MU    | Individualised music interventions                                                                                                                                                                                                          | Mode: Individual; Interventionist: Music facilitator; Duration: 10 weeks.                             | usual care        | BPSD (overall)                        | Greater long-term reduction in BPSD was observed in IG compared with CG.                                                                                  |
| 16 | Van Haitsma et al. (2013) | Interest and ability | MP    | Individualised Positive Psychosocial Intervention based on participants' leisure interests that included physical exercise, music, ADLs, reminiscence and sensory stimulation.                                                              | Mode: Individual; Interventionist: Certified nursing assistants; Duration: 3 weeks                    | Attention control | BPSD (overall)                        | IG experienced more pleasure, alertness, engagement, positive touch, and positive verbal behavior compared with CG.                                       |
| 17 | Yoon et al. (2013)        | Ability level        | MP    | Cognitive activity combined with physical exercise                                                                                                                                                                                          | Mode: Group; Interventionist: Unspecified; Duration: 12 weeks                                         | Attention control | Depression                            | IG showed improvement in cognition and reduction in depression compared to CG.                                                                            |
| 18 | Toba et al. (2014)        | Abilities and needs  | MP    | Intensive rehabilitation programme included reminiscence, reality orientation, memory rehabilitation, music therapy, physical exercise, occupational therapy, speech communication therapy and learning sessions                            | Mode: Individual; Interventionist: Physical, occupational or speech therapists; Duration: 3 months    | usual care        | BPSD, depression,                     | IG showed more reduction in BPSD and improvement in cognition compared to CG.                                                                             |
| 19 | Holthoff et al. (2015)    | Ability level        | P     | Physical activity training. Patients in the intervention group trained their lower body on a movement trainer with individually preassigned training flow. Caregivers were asked to choose a familiar chair prior to commencement of study. | Mode: Unspecified; Interventionist: Caregivers/ computer; Duration: 12 weeks. 3-month follow up test. | usual care        | BPSD                                  | IG experienced stable BPSD and CG experienced increases in BPSDs at follow-up.                                                                            |
| 20 | Telenius et al. (2015)    | Performance levels   | P     | Individually fitted High-Intensity Exercise Program                                                                                                                                                                                         | Mode: Individual; Interventionist: Physiotherapist; Duration: 12 weeks                                | Attention control | BPSD, QoL, depression,                | IG experienced more reduction in BPSD compared to CG.                                                                                                     |
| 21 | Davison et al. (2016)     | Interest             | C     | Using a personal computer to play favourite music and display photographs, movies and messages selected by participants and family members                                                                                                  | Mode: Individual; Interventionist: Research staff; Duration: 4 weeks                                  | usual care        | BPSD (Agitation), Depression, Anxiety | IG experienced reduction in depression and anxiety compared to CG.                                                                                        |
| 22 | Giuli et al. (2016)       | cognitive function   | C     | Non-pharmacological intervention consisting of comprehensive cognitive training                                                                                                                                                             | Mode: Individual; Interventionist: Experienced psychologists; Duration: 10 weeks                      | usual care        | Depression and cognition              | Compared to CG, IG with Alzheimer's disease experienced improvement in cognition. IG with mild cognitive impairment experienced improvement in cognition. |

Lu et al. (2021).

Supplementary Table 5. (Continued) Interventions and activities tailored for participants' characteristics

| #  | Author (Year)         | PWD characteristics                                                                                                                                      | Types | Content of tailored activities/intervention                                                                                                                                                                                                                                                                                                                                    | Delivery                                                                                                                           | Comparator        | Outcomes                       | Findings                                                                                                                                                                         |
|----|-----------------------|----------------------------------------------------------------------------------------------------------------------------------------------------------|-------|--------------------------------------------------------------------------------------------------------------------------------------------------------------------------------------------------------------------------------------------------------------------------------------------------------------------------------------------------------------------------------|------------------------------------------------------------------------------------------------------------------------------------|-------------------|--------------------------------|----------------------------------------------------------------------------------------------------------------------------------------------------------------------------------|
| 23 | Lu et al. (2016)      | Congruence in level of awareness of functional ability, types and frequencies of meaningful activity, perceived barriers to engaging in these activities | MP    | Daily Engagement of Meaningful Activities using the principles of problem-solving therapy and, consistent with the overall goals of this intervention, providing autonomy support by helping patients identify and prioritise meaningful activities, identify needs and goals, generate manageable solutions, and engage in self-selected activities with family support, etc. | Mode: Group; Interventionist: Trained nurse; Duration: 2 weeks. Follow up: 3 months                                                | Attention control | BPSD (Depression)              | IG showed less improvement in depressive symptoms than CG at follow-up.                                                                                                          |
| 24 | Prick et al. (2016)   | Physical capacities, information about pleasant activities for the dyad                                                                                  | MP    | Multicomponent dyadic intervention comprising physical exercise training, psychoeducation, communication skills training, and pleasant activities training.                                                                                                                                                                                                                    | Mode: Individual; Interventionist: Personal coach; Duration: 3 months. 6 month follow up.                                          | usual care        | BPSD, depression, health       | Analyses showed no beneficial effects over time on any of the outcome measures.                                                                                                  |
| 25 | Bailey et al. (2017)  | participant's specific area of interest                                                                                                                  | MP    | Multicomponent intervention including group activity sessions using question-asking-reading (QAR), reminiscence, cognitive-behavioural therapy techniques, environmental support and individualised behavioural activity programme.                                                                                                                                            | Mode: Group; Interventionist: Two upper-level graduate students in clinical psychology and one PhD psychologist; Duration: 6 weeks | usual care        | Depression, QoL and engagement | IG showed more improvement in depression than CG.                                                                                                                                |
| 26 | Li et al. (2017)      | Interest, capacities and culture background                                                                                                              | MP    | Folk recreation programme plus personalised training on daily life activities and individual activity programme according to participants' interest.                                                                                                                                                                                                                           | Mode: Mixed; Interventionist: Researcher; Duration: 16 weeks                                                                       | usual care        | BPSD                           | The folk recreation programme has the potential to improve cognitive function, ability of daily living and behavioural and psychological symptoms of older people with dementia. |
| 27 | Gitlin et al. (2017)  | Capabilities, functioning, interest, environment, caregivers                                                                                             | MP    | Tailored activity programme                                                                                                                                                                                                                                                                                                                                                    | Mode: Individual; Interventionist: Occupational therapists; Duration: 4 months                                                     | Attention control | BPSD                           | Intervention group showed reduction in BPSDs and functional dependence.                                                                                                          |
| 28 | Tanaka et al. (2017)  | Meaningfulness, personal history                                                                                                                         | MP    | Personal rehabilitation comprising cognitive rehabilitation and involving reminiscence therapy, reality orientation, and physical activity.                                                                                                                                                                                                                                    | Mode: Mixed; Interventionist: Staff member; Duration: 12 weeks                                                                     | usual care        | Depression & QoL               | No statistically significant differences between IG and CG in interested outcomes.                                                                                               |
| 29 | Novelli et al. (2018) | Capabilities, previous interests, frequency, and intensity of BPSD in PWD, daily care routines of the caregiver and home environment.                    | MP    | Tailored activity programme                                                                                                                                                                                                                                                                                                                                                    | Mode: Individual; Interventionist: Occupational therapy, caregiver; Duration: 4 months                                             | wait-list         | BPSD and QoL                   | IG experienced reduced BPSD and improvement in QoL compared to CG                                                                                                                |

Lu et al. (2021).

Supplementary Table 5. (Continued) Interventions and activities tailored for participants' characteristics

| #  | Author (Year)             | PWD characteristics                                                           | Types | Content of tailored activities/intervention                                                                                                                                                                                                                                                                                                                                  | Delivery                                                                                                                                 | Comparator        | Outcomes           | Findings                                                                                                                                        |
|----|---------------------------|-------------------------------------------------------------------------------|-------|------------------------------------------------------------------------------------------------------------------------------------------------------------------------------------------------------------------------------------------------------------------------------------------------------------------------------------------------------------------------------|------------------------------------------------------------------------------------------------------------------------------------------|-------------------|--------------------|-------------------------------------------------------------------------------------------------------------------------------------------------|
| 30 | Kwak et al. (2018)        | Music preference                                                              | MU    | A passive music intervention using personalised music playlists delivered on digital music players.                                                                                                                                                                                                                                                                          | Mode: Individual; Interventionist: Nursing home staff; Duration: 14 weeks                                                                | usual care        | BPSD               | No statistically significant differences between IG and CG in any of the outcomes measured.                                                     |
| 31 | Jeon et al. (2020)        | Capacities/needs, environment                                                 | MP    | A multi- and interdisciplinary plan tailored to meet the client's needs to enhance self-care ability and using person-centred goal setting included cognitive rehabilitation techniques, energy conservation and task simplification strategies, balance and strength exercises, pain relief management, anxiety management, problem solving, and medication simplification. | Mode: Individual; Interventionist: Occupational therapists, registered nurse, neuropsychologist; Duration: 4 months. 12 month follow-up. | usual care        | Depression and QoL | No statistically significant differences between IG and CG in any of the outcomes measured.                                                     |
| 32 | de Oliveira et al. (2019) | Cognitive and functional capacities, previous abilities, interests, and roles | MP    | Tailored activity programme                                                                                                                                                                                                                                                                                                                                                  | Mode: Individual; Interventionist: Occupational therapists; Duration: 3 months                                                           | Attention control | BPSD               | Compared to CG, IG experienced reduction in BPSD.                                                                                               |
| 33 | O'Connor et al. (2019)    | Capabilities, functioning, interest, environment, caregivers                  | MP    | Tailored activity programme                                                                                                                                                                                                                                                                                                                                                  | Mode: Individual; Interventionist: Occupational therapists; Duration: 4 months                                                           | usual care        | BPSD and QoL       | IG showed an overall reduction of behavioural symptoms and maintenance of functional performance in the person with dementia, compared to CG.   |
| 34 | Weise et al. (2020)       | Preference for music                                                          | MU    | Individualised recorded music                                                                                                                                                                                                                                                                                                                                                | Mode: Individual; Interventionist: Social service staff and project staff; Duration: 4 weeks                                             | wait-list         | BPSD               | No significant findings on reduction in BPSD between IG and CG.                                                                                 |
| 35 | Huber et al. (2020)       | Preference, meaningfulness                                                    | MP    | Individualised music listening                                                                                                                                                                                                                                                                                                                                               | Mode: Individual; Interventionist: Caregivers/staff member; Duration: 4 weeks                                                            | usual care        | BPSD, depression   | Depression scores decreased significantly over time while agitated behaviour showed a constant moderate level without any significant decrease. |

Note: P=physical; C=cognitive; MU=musical; MP=multiple; IG=intervention group; CG=control group. BPSD = behavioural and psychological symptoms of dementia; QoL=Quality of life.

Lu et al. (2021).

Supplementary Table 6. Sensitivity analyses: effect sizes when including studies with people with dementia only in their samples

| Outcome                  | Fixed effect models    |         | Random effect models      |         |
|--------------------------|------------------------|---------|---------------------------|---------|
|                          | SMD (95% CI)           | p-value | SMD (95% CI)              | p-value |
| <i>Main effects</i>      |                        |         |                           |         |
| BPSD                     | -0.34 (-0.44 to -0.23) | <0.001  | -0.38 (-0.56 to -0.19)    | <0.001  |
| Quality of life          | 0.43 (0.25 - 0.62)     | <0.001  | 0.52 (0.27 - 0.77)        | <0.001  |
| Depression               | -0.38 (-0.57 to -0.20) | <0.001  | -0.38 (-0.57 to -0.20)    | <0.001  |
| Engagement               | 0.58 (0.41 - 0.75)     | <0.001  | 0.84 (0.14 - 1.54)        | 0.019   |
| <i>Subgroup Analysis</i> |                        |         |                           |         |
| BPSD                     |                        |         |                           |         |
| High                     | -0.46 (-0.62 to -0.3)  | <0.001  | -0.524 (-0.752 to -0.296) | <0.001  |
| Medium                   | -0.34 (-0.51 to -0.16) | 0.000   | -0.363 (-0.774 to 0.048)  | 0.083   |
| Low                      | -0.04 (-0.29 to 0.21)  | 0.750   | -0.04 (-0.289 to 0.208)   | 0.750   |
| Quality of life          |                        |         |                           |         |
| High                     | 0.4 (0.18 to 0.62)     | <0.001  | 0.6 (0.17 to 1.04)        | 0.010   |
| Medium                   | 0.43 (0.01 to 0.85)    | 0.027   | 0.43 (0.01 to 0.85)       | 0.040   |
| Low                      | 0.72 (0.08 to 1.36)    | 0.044   | 0.72 (0.08 to 1.36)       | 0.030   |
| Depression               |                        |         |                           |         |
| High                     | -0.34 (-0.55 to -0.12) | 0.002   | -0.34 (-0.55 to -0.12)    | 0.002   |
| Medium                   | -0.75 (-1.33 to -0.17) | 0.011   | -0.75 (-1.33 to -0.17)    | 0.011   |
| Low                      | -0.38 (-0.82 to 0.06)  | 0.089   | -0.38 (-0.82 to 0.06)     | 0.089   |
| Engagement               |                        |         |                           |         |
| High                     | 0.85 (0.32 to 1.38)    | 0.002   | 0.85 (0.32 to 1.38)       | 0.002   |
| Medium                   | 0.27 (0.05 to 0.49)    | 0.018   | 0.27 (0.05 to 0.49)       | 0.018   |
| Low                      | 0.39 (0.04 to 0.74)    | 0.029   | 0.39 (0.04 to 0.74)       | 0.029   |

Notes: Excluded studies that included patients with dementia and patients with cognitive impairment in the samples. BPSD: Holthoff et al. (2015) & Telenius et al. (2015); Quality of life: Bailey et al (2017) & Jeon et al. (2019); Depression: Bailey et al(2017) & Jeon et al. (2019) & Lu et al (2016) & Giuli et al (2016); Engagement: Bailey et al (2017)

Lu et al. (2021).

Supplementary Figure 1. The process of tailoring and rating criteria

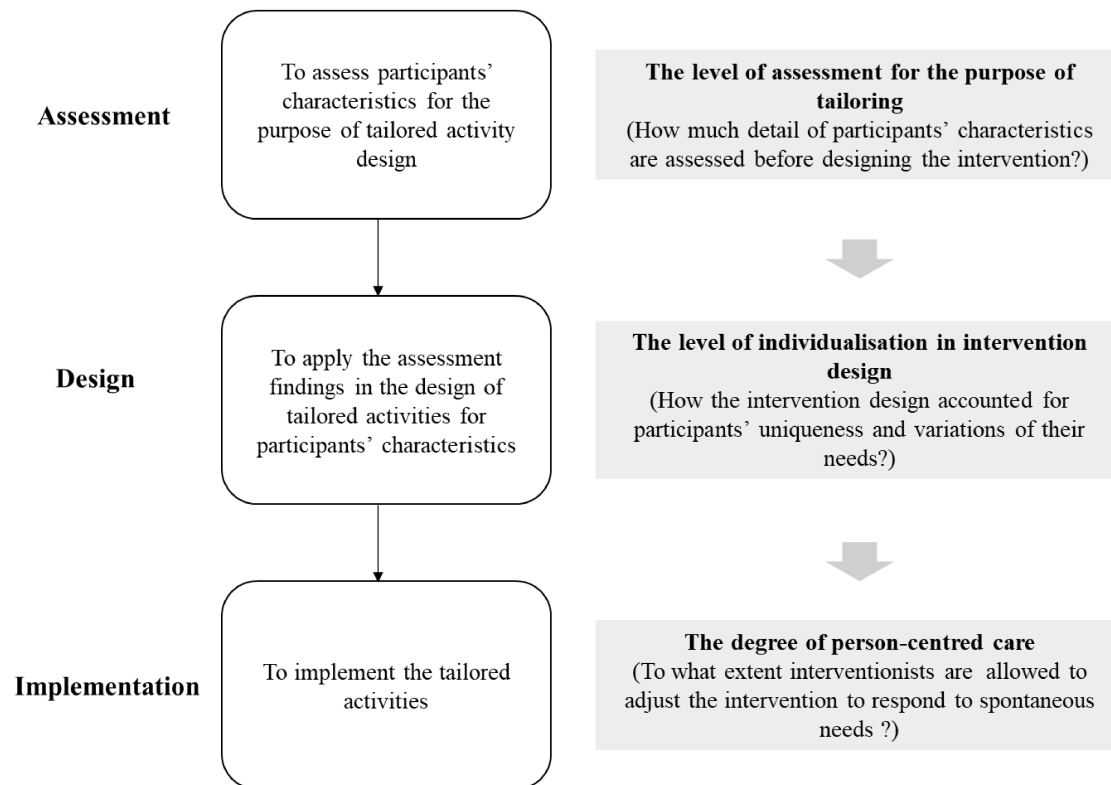

Lu et al. (2021).

Supplementary Figure 2. Flowchart of included articles

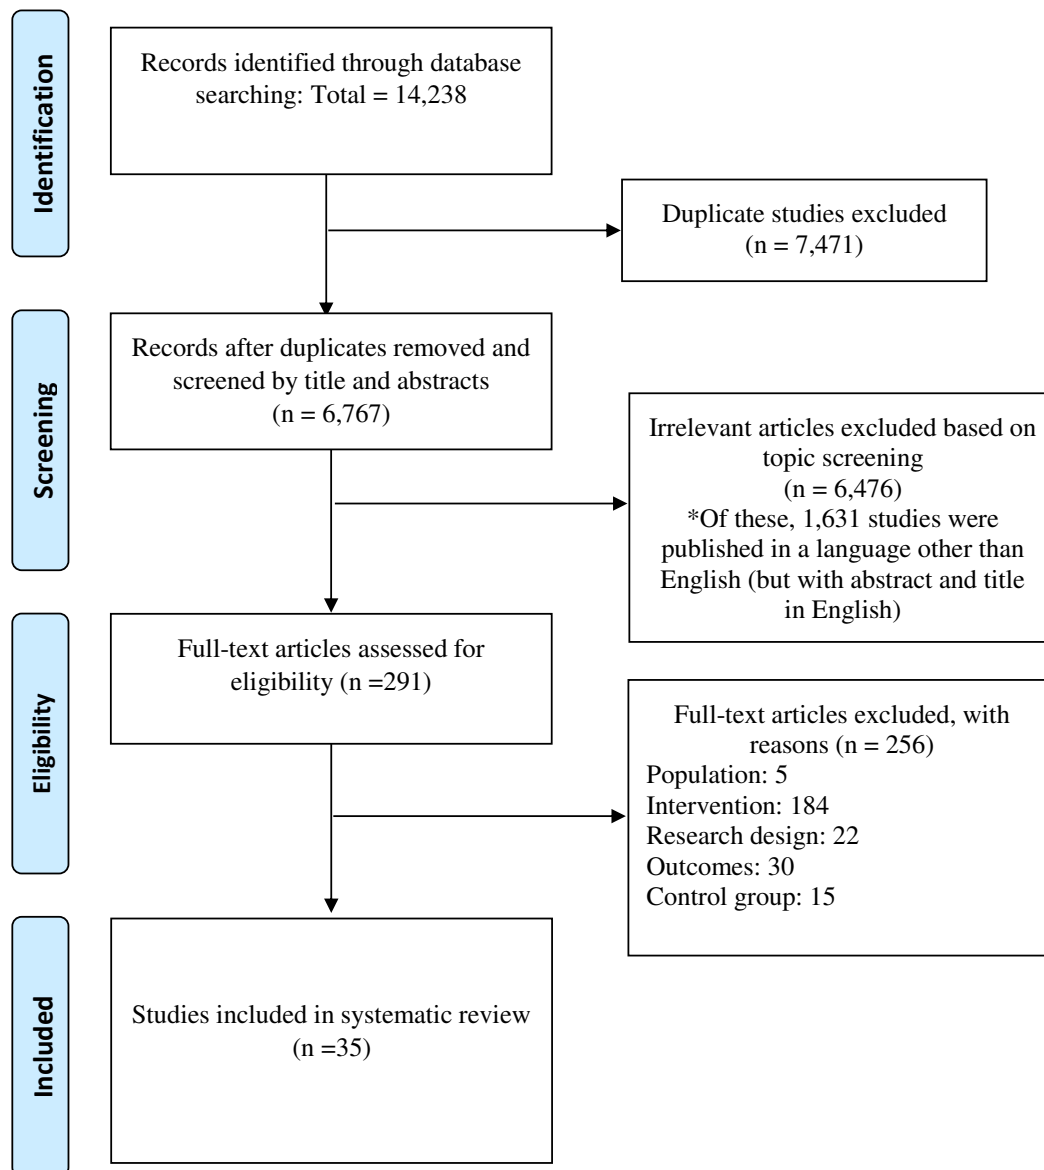

Lu et al. (2021).

Supplementary Figure 3. Risk of Bias Graph for RCT studies (N=30)

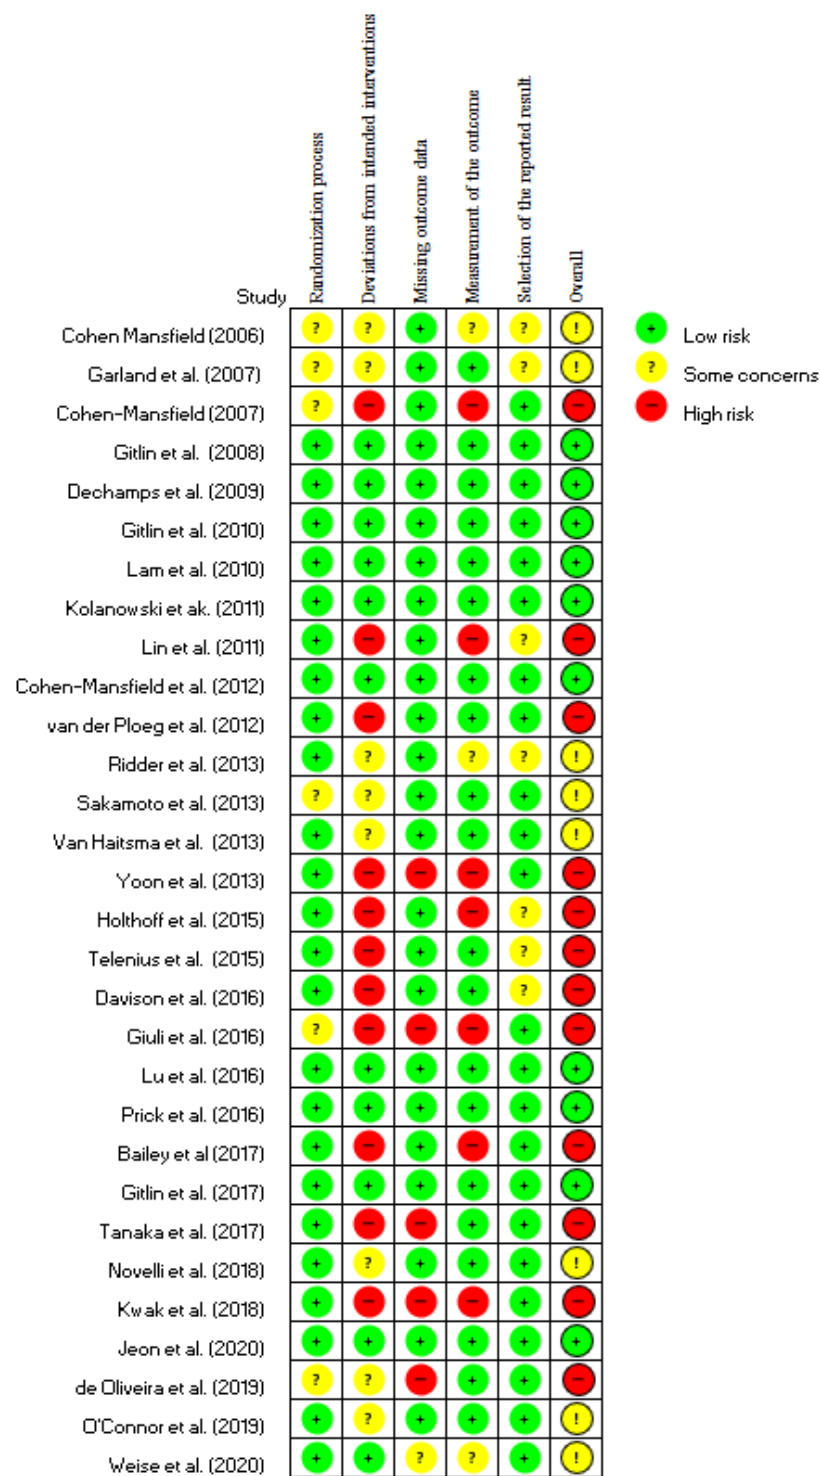



Lu et al. (2021).

Supplementary Figure 4. Risk of Bias Graph for quasi-experimental studies (N=5)

|       |                             | Risk of bias domains |    |    |    |    |    |    |         |
|-------|-----------------------------|----------------------|----|----|----|----|----|----|---------|
|       |                             | D1                   | D2 | D3 | D4 | D5 | D6 | D7 | Overall |
| Study | Toba et al. (2014)          | +                    | +  | +  | +  | +  | -  | +  | -       |
|       | Li et al. (2017)            | +                    | +  | +  | +  | +  | -  | +  | -       |
|       | Sung et al. (2010)          | +                    | +  | +  | +  | ?  | -  | +  | ×       |
|       | Huber et al. (2020)         | +                    | ?  | +  | +  | +  | -  | +  | ×       |
|       | Orsulic-Jeras et al. (2000) | +                    | +  | ?  | -  | ?  | -  | +  | ×       |

Domains:  
D1: Bias due to confounding.  
D2: Bias due to selection of participants.  
D3: Bias in classification of interventions.  
D4: Bias due to deviations from intended interventions.  
D5: Bias due to missing data.  
D6: Bias in measurement of outcomes.  
D7: Bias in selection of the reported result.

Judgement  
× Serious  
- Moderate  
+ Low  
? No information

Lu et al. (2021).

Supplementary Figure 5. Effects of tailored interventions on depression at post-intervention (N=14)

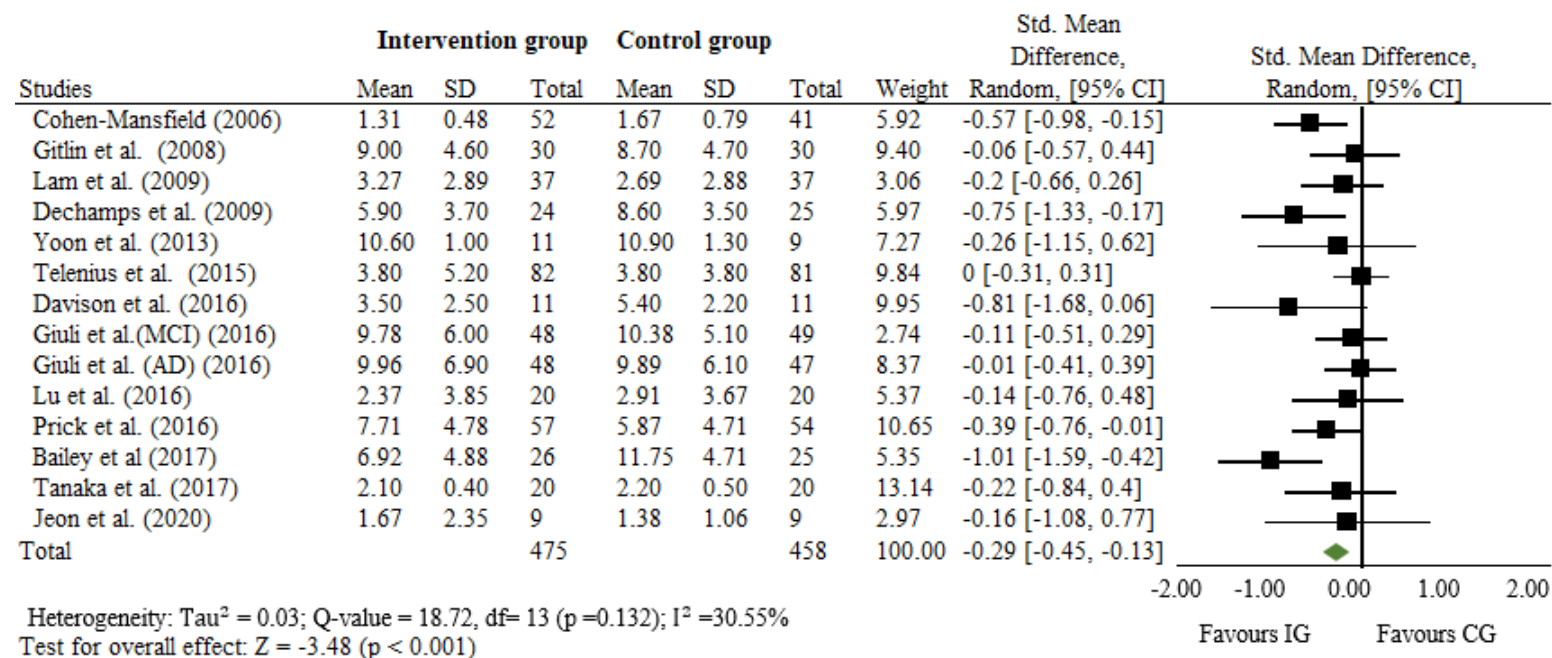

Notes: Fixed effect: SMD<sub>pooled</sub> = -0.26, 95% CI = -0.39 to -0.13, p < 0.001

Lu et al. (2021).

Supplementary Figure 6. Effects of tailored interventions on engagement at post-intervention (N =8)

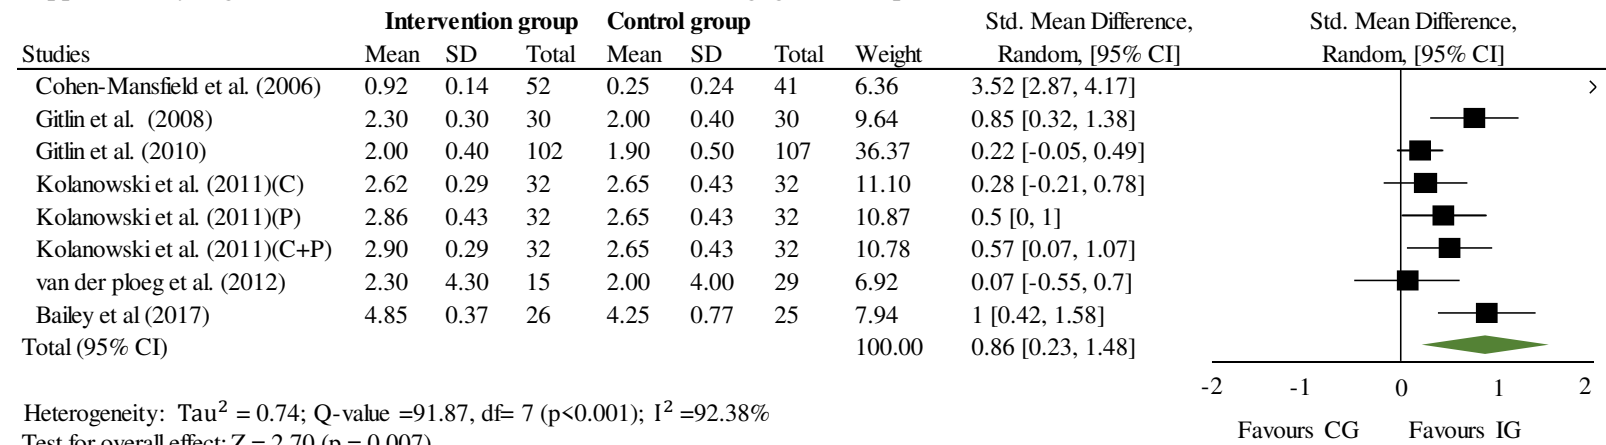

Notes: Fixed effects:  $SMD_{pooled} = 0.62$ , 95 % CI: (0.45 – 0.78),  $p < 0.001$ .

Lu et al. (2021).

Supplementary Figure 7. Subgroup analysis: Effects of tailored interventions on depression at post-intervention by level of personalisation (N=14)

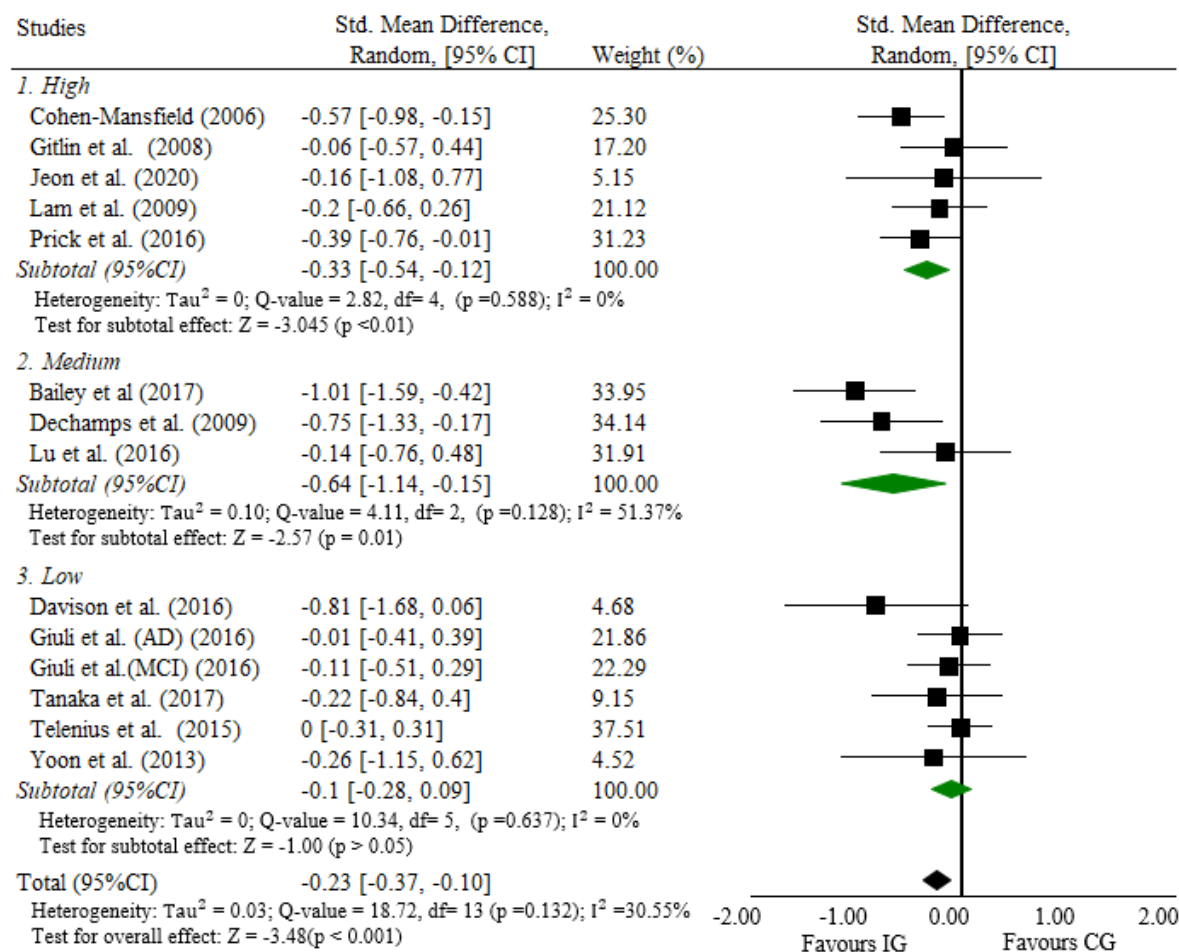

Notes: (1) High group. Fixed effect:  $\text{SMD}_{\text{pooled}} = -0.33$ , 95% CI = -0.54 to -0.12, p = 0.002; Middle group. Fixed effect:  $\text{SMD}_{\text{pooled}} = -0.65$ , 95% CI = -1.00 to -0.31, p < 0.001; Low group. Fixed effect:  $\text{SMD}_{\text{pooled}} = -0.10$ , 95% CI = -0.28 to 0.09, p = 0.316. (2) Test for the difference across three subgroups: Q-value = 8.373, df (Q) = 2, p = 0.015.

Lu et al. (2021).

Supplementary Figure 8. Subgroup analysis: Effects of tailored interventions on engagement at post-intervention by level of personalisation (N=7)

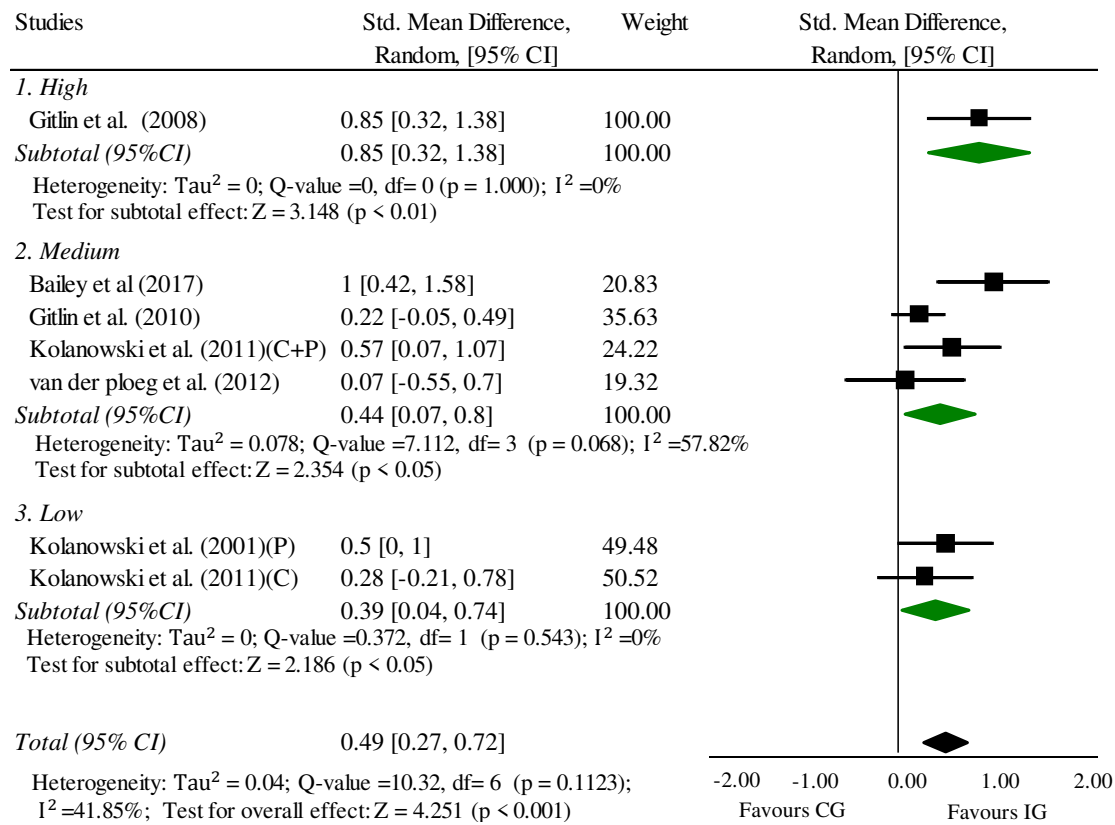

Note: (1) One study was not included in this meta-analysis based on the findings from Supplementary Figure 5 in order to reduce heterogeneity. (2) Fixed effects for three groups. High group: SMD<sub>pooled</sub> = 0.85, 95% CI = 0.32 to 1.38, p = 0.002; Middle group: SMD<sub>pooled</sub> = 0.36, 95% CI = 0.16 to 0.57, p = 0.001; Low group: SMD<sub>pooled</sub> = 0.39, 95% CI = 0.04 to 0.74, p = 0.029. (3) Test for the difference across three subgroups: Q-value = 2.836, df (Q) = 2, p = 0.242.

Lu et al. (2021).

Appendix 1. Data extraction form

| #  | Information                                            | Instruction                                                                                                                 |
|----|--------------------------------------------------------|-----------------------------------------------------------------------------------------------------------------------------|
| 1  | Author (Year)                                          | n/a                                                                                                                         |
| 2  | Countries                                              | n/a                                                                                                                         |
| 3  | Age, Mean(SD)                                          | n/a                                                                                                                         |
| 4  | Dementia/Cognitive impairment or mixed                 | n/a                                                                                                                         |
| 5  | Sample size [Intervention and control group)           | Separate the sample size for the intervention and control groups                                                            |
| 6  | Study design                                           | RCT/Quasi-experimental design                                                                                               |
| 7  | Study setting                                          | Home/Community/long-term care facilities, etc.                                                                              |
| 8  | Tailored for PWD characteristics                       | Capacity, interest/preferences, habits, roles, personal history, living environment, etc.                                   |
| 9  | Activity Type                                          | Physical, cognitive, musical, multiple activities                                                                           |
| 10 | Content of tailored activities/intervention            | Document the content of tailored activities in detail                                                                       |
| 11 | Delivery mode                                          | Individual, group or mixed                                                                                                  |
| 12 | Interventionist                                        | Document type of interventionist                                                                                            |
| 13 | Duration of the intervention                           | Document duration of the intervention                                                                                       |
| 14 | Comparator                                             | Control group                                                                                                               |
| 15 | Outcomes                                               | Identify reported outcome(s) of interest in the study                                                                       |
| 16 | Statistics                                             | Pre and Post Mean and SD                                                                                                    |
| 17 | Findings                                               | Summarise the findings                                                                                                      |
| 18 | Level of assessment for tailoring                      | Describe how the studies assessed participants' characteristics for the purpose of tailoring                                |
| 19 | Degree of individualization in design                  | Document the aspects of participants' characteristics targeted in the tailored activities                                   |
| 20 | Degree of person-centred care in intervention delivery | Document the extent to which interventionists had the autonomy to adjust the intervention to respond to participants' needs |
